# Supplementary material for: A simplistic approach of algal biofuels production from wastewater using a Hybrid Anaerobic Baffled Reactor and Photobioreactor (HABR-PBR) System
Source: PLoS One. 2019 Dec 5;14(12):e0225458. doi: 10.1371/journal.pone.0225458 (PMC6894839; doi:10.1371/journal.pone.0225458)
Supplement: S1 File — (XLSX) [file pone.0225458.s004.xlsx]

## Sheet: NH4(U)
Single Factor ANOVA analysis for Ammonia-N Loading Rate(LR) and Removal Rate (RR) in HABR (U)
Anova: Single Factor
SUMMARY
Groups	Count	Sum	Average	Variance
Column 1	10	524.136	52.4136	340.408
Column 2	10	175.488	17.5488	383.708
ANOVA
Source of Variation	SS	df	MS	F	P-value	F crit
Between Groups	6077.77	1	6077.77	16.7867	0.000676481	4.41387
Within Groups	6517.05	18	362.058
Total	12594.8	19

## Sheet: NH4(I)
Single Factor ANOVA analysis for Ammonia-N LR and Ammonia-N RR in HABR (I)
Anova: Single Factor
SUMMARY
Groups	Count	Sum	Average	Variance
Column 1	10	525.112	52.5112	438.241
Column 2	10	141.312	14.1312	500.825
ANOVA
Source of Variation	SS	df	MS	F	P-value	F crit
Between Groups	7365.12	1	7365.12	15.6861	0.000916944	4.41387
Within Groups	8451.59	18	469.533
Total	15816.7	19

## Sheet: NO3(U)
Single Factor ANOVA analysis for Nitrate-N LR and Nitrate-N RR in HABR (U)
Anova: Single Factor
SUMMARY
Groups	Count	Sum	Average	Variance
Column 1	12	350.48	29.2067	1511.07
Column 2	12	214.28	17.8567	1197.85
ANOVA
Source of Variation	SS	df	MS	F	P-value	F crit
Between Groups	772.935	1	772.935	0.57066	0.458009	4.30095
Within Groups	29798.1	22	1354.46
Total	30571	23

## Sheet: NO3(I)
Single Factor ANOVA analysis for Nitrate-N LR and Nitrate-N RR in HABR (I)
Anova: Single Factor
SUMMARY
Groups	Count	Sum	Average	Variance
Column 1	12	351.92	29.3267	1186.95
Column 2	12	265	22.0833	998.255
ANOVA
Source of Variation	SS	df	MS	F	P-value	F crit
Between Groups	314.795	1	314.795	0.288116	0.596818	4.30095
Within Groups	24037.2	22	1092.6
Total	24352	23

## Sheet: NH3-NO3(U)
Single Factor ANOVA analysis for Ammonia-N LR and Nitrate-N RR in HABR (U)
Anova: Single Factor
SUMMARY
Groups	Count	Sum	Average	Variance
Column 1	9	444.576	49.3973	280.608
Column 2	9	160.64	17.8489	1579.32
ANOVA
Source of Variation	SS	df	MS	F	P-value	F crit
Between Groups	4478.87	1	4478.87	4.81618	0.0432989	4.494
Within Groups	14879.4	16	929.963
Total	19358.3	17

## Sheet: NH3-NO3(I)
Single Factor ANOVA analysis for Ammonia-N LR and Nitrate-N RR in HABR (I)
Anova: Single Factor
SUMMARY
Groups	Count	Sum	Average	Variance
Column 1	10	525.112	52.5112	438.241
Column 2	10	239.68	23.968	1194.33
ANOVA
Source of Variation	SS	df	MS	F	P-value	F crit
Between Groups	4073.57	1	4073.57	4.99038	0.0384149	4.41387
Within Groups	14693.1	18	816.285
Total	18766.7	19
