# Supplementary material for: A simplistic approach of algal biofuels production from wastewater using a Hybrid Anaerobic Baffled Reactor and Photobioreactor (HABR-PBR) System
Source: PLoS One. 2019 Dec 5;14(12):e0225458. doi: 10.1371/journal.pone.0225458 (PMC6894839; doi:10.1371/journal.pone.0225458)
Supplement: S2 File — (XLSX) [file pone.0225458.s005.xlsx]

## Sheet: HABR (U)
Temperature data of HABR (U).
Date and Time	Raw (Up)	U-1	U-2	U-3	U-4	U-5	U-6	U-7	Air Temp
2018-06-04 00:55:00	22.8	28.9	28.6	28.9	28.8	28.2	28.1	26.9	23.3
2018-06-04 01:55:00	22.9	28.3	28	28.3	28.3	27.6	27.5	26.4	23.3
2018-06-04 02:55:00	21.9	27.6	27.4	27.8	27.8	27	26.9	25.9	22.3
2018-06-04 03:55:00	21.3	26.9	26.8	27.2	27.1	26.5	26.4	25.3	21.7
2018-06-04 04:56:00	21.1	26.3	26.2	26.6	26.6	25.9	25.8	24.8	21.5
2018-06-04 05:56:00	21.6	25.8	25.7	26.1	26.1	25.4	25.3	24.3	21.9
2018-06-04 06:56:00	22.3	25.4	25.3	25.8	25.8	25	24.9	24	22.6
2018-06-04 07:56:00	23.1	25.1	25	25.4	25.5	24.7	24.6	23.9	23.4
2018-06-04 08:56:00	24.1	25.1	24.9	25.4	25.4	24.7	24.6	24	24.4
2018-06-04 09:57:00	25.9	25.4	25.1	25.6	25.6	24.8	24.7	24.3	26.3
2018-06-04 10:57:00	28.4	26.3	25.7	26.1	26.1	25.4	25.3	25.3	28.6
2018-06-04 11:57:00	30.1	27.3	26.4	26.8	26.7	26.2	26.1	26.5	30.3
2018-06-04 12:57:00	31.9	28.3	27.3	27.6	27.4	27.1	27	27.8	31.9
2018-06-04 13:57:00	34.2	29.3	28.1	28.4	28.2	28	27.9	29.1	34.1
2018-06-04 14:58:00	34.8	30.3	29.1	29.3	29.1	29.2	29.1	30.4	34.6
2018-06-04 15:58:00	34.4	31.2	29.9	30.1	29.9	30.1	30	31.4	34.3
2018-06-04 16:58:00	34.4	31.9	30.6	30.8	30.6	30.9	30.8	32.1	34.3
2018-06-04 17:58:00	33.4	32.4	31.1	31.3	31.1	31.5	31.4	32.5	33.7
2018-06-04 18:58:00	30.3	32.6	31.4	31.6	31.4	31.7	31.6	32.4	30.6
2018-06-04 19:59:00	29.1	32.4	31.4	31.5	31.4	31.7	31.6	31.9	29.3
2018-06-04 20:59:00	28.6	32.1	31.2	31.4	31.3	31.4	31.3	31.3	28.8
2018-06-04 21:59:00	26.3	31.7	30.9	31.1	30.9	31	30.9	30.8	26.7
2018-06-04 22:59:00	24.3	30.9	30.3	30.5	30.4	30.5	30.4	29.9	24.8
2018-06-04 23:59:00	24.7	30.3	29.8	30	29.9	29.9	29.8	29.2	25.1
2018-08-04 00:04:00	21.3	29.2	28.8	29.1	29.1	28.9	28.8	27.6	21.6
2018-08-04 01:04:00	21.6	28.4	28.1	28.4	28.3	28	27.9	26.7	21.9
2018-08-04 02:05:00	22.1	27.7	27.4	27.8	27.8	27.3	27.2	26	22.3
2018-08-04 03:05:00	21.6	27	26.8	27.2	27.1	26.6	26.5	25.4	21.9
2018-08-04 04:05:00	21.6	26.4	26.3	26.7	26.7	26	25.9	24.9	21.9
2018-08-04 05:05:00	21.6	25.9	25.8	26.2	26.2	25.5	25.4	24.4	21.8
2018-08-04 06:05:00	21.8	25.5	25.3	25.8	25.8	25.1	25	24.1	22.1
2018-08-04 07:06:00	21.8	25.1	25	25.4	25.4	24.7	24.6	23.8	22.1
2018-08-04 08:06:00	22.3	24.9	24.6	25.1	25.1	24.4	24.3	23.6	23.4
2018-08-04 09:06:00	23.8	25.4	24.9	25.3	25.3	24.5	24.4	23.8	25.8
2018-08-04 10:06:00	25.7	27.1	25.6	25.9	25.8	25	24.9	24.5	26
2018-08-04 11:06:00	27.9	28.6	26.3	26.4	26.1	25.5	25.4	25.3	28.1
2018-08-04 12:07:00	30.8	28.6	27.8	27.4	27	26.1	26	26.1	30.4
2018-08-04 13:07:00	30.4	28.9	28.5	28.4	28	27	26.9	26.8	30.3
2018-08-04 14:07:00	30.4	29.4	28.9	29.1	28.6	27.7	27.6	27.9	30.9
2018-08-04 15:07:00	31.2	30.3	29.5	29.7	29.3	28.5	28.4	28.8	32.1
2018-08-04 16:07:00	32.1	30.9	30.2	30.3	30	29.2	29.1	29.6	32.9
2018-08-04 17:08:00	32.6	31.4	30.8	30.9	30.6	29.8	29.7	30.1	32.3
2018-08-04 18:08:00	31.1	31.6	31.1	31.3	30.9	30.2	30.1	30.4	30.9
2018-08-04 19:08:00	29	31.6	31.1	31.4	31.1	30.5	30.4	30.4	29.7
2018-08-04 20:08:00	28.9	31.1	30.9	31.3	31	30.5	30.4	30.2	28.3
2018-08-04 21:08:00	28.8	30.6	30.5	30.9	30.8	30.2	30.1	29.8	27.1
2018-08-04 22:09:00	28.7	29.9	30.1	30.6	30.4	29.9	29.8	29.4	26.5
2018-08-04 23:09:00	28.6	29.3	29.6	30.1	30.1	29.5	29.4	28.9	26.1
2018-11-04 00:19:00	29.6	29.7	29.8	30.5	30.6	30.1	30	29.4	26.1
2018-11-04 01:19:00	29.4	29.1	29.3	30	30.1	29.7	29.6	29.1	25.8
2018-11-04 02:19:00	29.2	28.7	28.8	29.6	29.8	29.4	29.3	28.8	25.7
2018-11-04 03:19:00	29	28.3	28.3	29.1	29.3	29	28.9	28.4	25.3
2018-11-04 04:19:00	28.8	27.9	27.9	28.7	28.9	28.7	28.6	28.2	25
2018-11-04 05:20:00	28.6	27.5	27.5	28.3	28.6	28.4	28.3	27.9	24.8
2018-11-04 06:20:00	28.4	27.2	27.1	27.9	28.2	28.1	28	27.6	24.5
2018-11-04 07:20:00	28.2	26.9	26.8	27.5	27.8	27.8	27.7	27.3	24.7
2018-11-04 08:20:00	28.1	26.9	26.7	27.4	27.7	27.7	27.6	27.2	26.7
2018-11-04 09:20:00	28.4	27.9	27.1	27.7	27.9	27.9	27.8	27.6	28.4
2018-11-04 10:21:00	28.7	29.2	28	28.3	28.4	28.2	28.1	28.1	31.5
2018-11-04 11:21:00	29.2	30.4	29	29	29	28.7	28.6	28.9	32.6
2018-11-04 12:21:00	29.5	31.3	30.1	29.9	29.8	29.5	29.4	29.6	33.8
2018-11-04 13:21:00	29.9	32	31	30.8	30.5	30.1	30	30.5	32.9
2018-11-04 14:21:00	30.2	32.7	31.8	31.6	31.3	30.8	30.7	31.2	34.1
2018-11-04 15:22:00	30.5	33.3	32.5	32.4	32	31.4	31.3	31.9	34.4
2018-11-04 16:22:00	31	33.8	33.1	33.1	32.6	32	31.9	32.4	34
2018-11-04 17:22:00	31.4	34.1	33.5	33.5	33.1	32.5	32.4	32.8	33.8
2018-11-04 18:22:00	31.6	34.1	33.6	33.7	33.4	32.8	32.7	32.9	32.3
2018-11-04 19:22:00	31.5	33.8	33.5	33.7	33.4	32.9	32.8	32.8	30.4
2018-11-04 20:23:00	31.4	33.3	33.1	33.4	33.2	32.7	32.6	32.4	29.6
2018-11-04 21:23:00	31.3	32.7	32.6	33.1	32.9	32.4	32.3	31.9	28.5
2018-11-04 22:23:00	31	32	32.1	32.6	32.5	32	31.9	31.4	27.7
2018-11-04 23:23:00	30.8	31.3	31.4	32.1	32.1	31.6	31.5	30.9	27.1
13/4/18 0:28:41	28.3	27.5	28.2	29.1	29.1	28.5	28.4	27.4	22.1
13/4/18 1:28:53	27.9	26.7	27.3	28.3	28.5	27.9	27.8	26.9	22
13/4/18 2:29:04	27.6	26	26.5	27.6	27.9	27.4	27.3	26.5	22
13/4/18 3:29:16	27.3	25.4	25.8	26.9	27.3	27	26.9	26.1	21.6
13/4/18 4:29:28	27	24.9	25.2	26.3	26.7	26.5	26.4	25.6	21.5
13/4/18 5:29:40	26.7	24.5	24.7	25.7	26.1	26	25.9	25.3	21.5
13/4/18 6:29:52	26.4	24.2	24.2	25.2	25.7	25.7	25.6	24.9	21.6
13/4/18 7:30:04	26.2	23.9	23.9	24.8	25.3	25.4	25.3	24.8	22.5
13/4/18 8:30:16	26.2	24.3	23.9	24.8	25.2	25.2	25.1	24.8	25
13/4/18 9:30:27	26.6	25.6	24.7	25.3	25.6	25.5	25.4	25.3	28.4
13/4/18 10:30:39	27.2	27.7	25.9	26.1	26.3	26.1	26	26.2	30.2
13/4/18 11:30:51	27.6	29	27.2	27	27	26.8	26.7	27.1	31.3
13/4/18 12:31:03	28.1	30.1	28.4	28.1	27.8	27.5	27.4	28.1	33.3
13/4/18 13:31:15	28.5	30.8	29.9	29.4	28.8	28.4	28.3	29	33.8
13/4/18 14:31:28	28.8	31.6	30.7	30.4	29.8	29.2	29.1	29.9	33.4
13/4/18 15:31:40	29.3	32.3	31.4	31.2	30.6	29.9	29.8	30.6	33.4
13/4/18 16:31:52	29.8	32.8	32.1	31.9	31.3	30.6	30.5	31.1	34
13/4/18 17:32:04	30.3	33.1	32.4	32.4	31.9	31.1	31	31.5	33.1
13/4/18 18:32:16	30.4	33.2	32.7	32.7	32.2	31.5	31.4	31.7	31.9
13/4/18 19:32:28	30.4	32.9	32.6	32.7	32.3	31.7	31.6	31.6	29.6
13/4/18 20:32:40	30.3	32.4	32.3	32.4	32.1	31.5	31.4	31.2	28.2
13/4/18 21:32:52	30.2	31.8	31.8	32.1	31.9	31.3	31.2	30.8	28.2
13/4/18 22:33:05	29.9	31.1	31.3	31.8	31.6	31	30.9	30.4	27.4
13/4/18 23:33:17	29.8	30.5	30.7	31.3	31.3	30.7	30.6	30.1	26.8
20/4/18 0:02:14	31.1	31.8	32.1	32.7	32.7	32.2	32.1	31.5	27.9
20/4/18 1:02:26	30.9	31.2	31.4	32.2	32.3	31.9	31.8	31.1	27.6
20/4/18 2:02:38	30.6	30.7	30.9	31.6	31.8	31.4	31.3	30.6	27.4
20/4/18 3:02:50	30.4	30.2	30.4	31.2	31.4	31	30.9	30.3	27.4
20/4/18 4:03:02	30.1	29.8	29.9	30.7	30.9	30.7	30.6	29.9	27.1
20/4/18 5:03:14	29.9	29.4	29.5	30.3	30.5	30.4	30.3	29.6	26.8
20/4/18 6:03:26	29.7	28.9	29.1	29.8	30.1	30	29.9	29.3	26.9
20/4/18 7:03:39	29.5	28.8	28.8	29.5	29.8	29.7	29.6	29.1	27.2
20/4/18 8:03:51	29.4	28.8	28.6	29.4	29.6	29.5	29.4	29	28.9
20/4/18 9:04:03	29.6	29.4	28.9	29.6	29.8	29.7	29.6	29.4	30
20/4/18 10:04:15	30	30.6	29.6	30.1	30.3	30.1	30	30.1	31.3
20/4/18 11:04:27	30.5	31.6	30.5	30.8	30.8	30.7	30.6	30.9	33.6
20/4/18 12:04:39	30.9	32.6	31.4	31.5	31.4	31.4	31.3	31.8	34.9
20/4/18 13:04:51	31.4	33.7	32.4	32.4	32.2	32	31.9	32.6	35.5
20/4/18 14:05:03	31.8	34.6	33.3	33.3	32.9	32.7	32.6	33.3	36.7
20/4/18 15:05:16	32.2	35.3	34.1	34.1	33.7	33.4	33.3	33.9	36.1
20/4/18 16:05:28	32.7	35.7	34.8	34.8	34.4	34	33.9	34.5	36.3
20/4/18 17:05:40	33.2	36	35.3	35.3	34.9	34.5	34.4	34.8	35.5
20/4/18 18:05:52	33.4	35.9	35.5	35.6	35.2	34.8	34.7	34.9	33.8
20/4/18 19:06:05	33.3	35.8	35.4	35.6	35.3	34.9	34.8	34.8	32.1
20/4/18 20:06:17	33.1	35.2	35	35.3	35	34.5	34.4	34.2	30.7
20/4/18 21:06:29	32.8	34.4	34.4	34.8	34.6	34.2	34.1	33.6	30.1
20/4/18 22:06:41	32.4	33.6	33.9	34.3	34.2	33.7	33.6	33	29.2
20/4/18 23:06:53	32.1	32.8	33.2	33.8	33.8	33.2	33.1	32.4	28.6
24/4/18 0:21:35	29.8	31.6	32.2	32.9	32.8	32.3	32.2	31.6	28.3
24/4/18 1:21:47	29.7	31	31.5	32.3	32.4	31.9	31.8	31.2	27
24/4/18 2:21:59	29.6	30.6	30.9	31.8	31.9	31.5	31.4	30.8	26.6
24/4/18 3:22:11	29.4	29.9	30.3	31.2	31.4	31.1	31	30.4	26.3
24/4/18 4:22:23	29.3	29.3	29.8	30.7	30.9	30.7	30.6	30	26.2
24/4/18 5:22:35	29.2	28.9	29.3	30.2	30.5	30.4	30.3	29.6	25.6
24/4/18 6:22:47	29.1	28.4	28.7	29.7	30	29.9	29.8	29.3	25.3
24/4/18 7:22:59	28.9	28	28.3	29.3	29.6	29.5	29.4	28.9	26.3
24/4/18 8:23:11	28.9	28.1	28.1	29.1	29.5	29.4	29.3	28.8	28.8
24/4/18 9:23:23	29.2	29.2	28.6	29.4	29.8	29.6	29.5	29.2	30.6
24/4/18 10:23:35	29.6	30.5	29.6	30.1	30.3	30.1	30	29.9	33.3
24/4/18 11:23:47	30	31.7	30.6	30.8	30.9	30.7	30.6	30.8	34.1
24/4/18 12:24:00	30.4	32.6	31.6	31.6	31.6	31.4	31.3	31.6	35.6
24/4/18 13:24:12	30.8	33.6	32.6	32.5	32.4	32.1	32	32.5	36.4
24/4/18 14:24:24	31.1	34.4	33.4	33.4	33.1	32.8	32.7	33.3	37.3
24/4/18 15:24:36	31.5	35.3	34.3	34.3	33.9	33.6	33.5	34	36.3
24/4/18 16:24:48	32	35.9	35.1	35	34.7	34.2	34.1	34.6	37.1
24/4/18 17:25:01	32.5	36.2	35.6	35.6	35.3	34.7	34.6	35.1	35.9
24/4/18 18:25:13	32.8	36.2	35.8	35.9	35.5	35	34.9	35.3	34.1
24/4/18 19:25:25	32.8	35.8	35.7	35.8	35.5	35.2	35.1	35.1	32
24/4/18 20:25:37	32.6	35.1	35.2	35.5	35.3	34.9	34.8	34.5	30.9
24/4/18 21:25:50	32.5	34.3	34.6	35.1	34.9	34.5	34.4	34	30.3
24/4/18 22:26:02	32.4	33.6	34.1	34.7	34.6	34.1	34	33.5	29.6
24/4/18 23:26:14	32.2	32.9	33.4	34.1	34.1	33.7	33.6	33	28.8
2018-03-05 00:42:00	26.8	25.2	25.4	26.5	26.9	26.7	26.6	25.8	22.3
2018-03-05 01:42:00	26.6	24.9	25	25.9	26.4	26.4	26.3	25.6	22
2018-03-05 02:42:00	26.4	24.6	24.6	25.4	25.9	26	25.9	25.2	21.9
2018-03-05 03:43:00	26.2	24.3	24.2	25	25.4	25.5	25.4	24.9	21.7
2018-03-05 04:43:00	25.9	23.9	23.8	24.6	25	25.2	25.1	24.5	21.6
2018-03-05 05:43:00	25.8	23.7	23.5	24.3	24.6	24.8	24.7	24.2	21.5
2018-03-05 06:43:00	25.6	23.5	23.3	23.9	24.3	24.5	24.4	23.9	21.9
2018-03-05 07:44:00	25.4	23.5	23.1	23.8	24.1	24.2	24.1	23.8	23.3
2018-03-05 08:44:00	25.4	23.8	23.3	23.8	24.1	24.2	24.1	23.9	24.6
2018-03-05 09:44:00	25.8	24.8	24	24.4	24.6	24.5	24.4	24.6	28.2
2018-03-05 10:44:00	26.2	26.3	25.1	25.3	25.3	25.1	25	25.4	29.3
2018-03-05 11:44:00	26.7	27.5	26.2	26.1	26.1	25.9	25.8	26.4	31.9
2018-03-05 12:45:00	27.1	28.6	27.4	27.2	27	26.7	26.6	27.4	34.1
2018-03-05 13:45:00	27.4	29.8	28.5	28.3	27.9	27.7	27.6	28.4	34.4
2018-03-05 14:45:00	27.8	30.6	29.5	29.3	28.9	28.5	28.4	29.3	33.3
2018-03-05 15:45:00	28.3	31.3	30.4	30.1	29.7	29.2	29.1	29.9	33.8
2018-03-05 16:45:00	28.8	31.8	31	30.9	30.4	29.9	29.8	30.5	33
2018-03-05 17:46:00	29.2	32.2	31.6	31.5	31.1	30.5	30.4	30.8	32.5
2018-03-05 18:46:00	29.3	32.2	31.8	31.8	31.3	30.9	30.8	31.2	31.3
2018-03-05 19:46:00	29.3	31.9	31.6	31.8	31.4	30.9	30.8	30.9	29.1
2018-03-05 20:46:00	29.3	31.4	31.3	31.6	31.3	30.9	30.8	30.6	28.3
2018-03-05 21:47:00	29.2	30.8	30.9	31.3	31.1	30.7	30.6	30.3	27.6
2018-03-05 22:47:00	29.1	30.3	30.4	31	30.9	30.4	30.3	29.9	27.6
2018-03-05 23:47:00	29	29.8	29.9	30.6	30.6	30.2	30.1	29.6	26.8
2018-05-05 00:52:00	28.9	28.3	28.4	29.3	29.6	29.4	29.3	28.8	26.1
2018-05-05 01:52:00	28.8	28	28.1	28.9	29.2	29.2	29.1	28.5	26.3
2018-05-05 02:53:00	28.6	27.8	27.8	28.6	28.9	28.9	28.8	28.3	26.2
2018-05-05 03:53:00	28.5	27.6	27.5	28.3	28.6	28.6	28.5	28.1	26.2
2018-05-05 04:53:00	28.4	27.5	27.3	28	28.3	28.4	28.3	27.8	26
2018-05-05 05:53:00	28.3	27.4	27.1	27.8	28	28.1	28	27.7	26.2
2018-05-05 06:53:00	28.1	27.3	26.9	27.6	27.8	27.9	27.8	27.5	26.4
2018-05-05 07:54:00	28	27.1	26.8	27.4	27.6	27.7	27.6	27.4	24
2018-05-05 08:54:00	27.7	26.9	26.7	27.3	27.4	27.4	27.3	26.9	28.9
2018-05-05 09:54:00	28.1	27.9	27.4	27.9	28	27.8	27.7	27.7	30.6
2018-05-05 10:54:00	28.4	29.1	28.3	28.5	28.6	28.4	28.3	28.5	31.9
2018-05-05 11:55:00	28.8	30.1	29.2	29.3	29.3	29	28.9	29.4	33.6
2018-05-05 12:55:00	29.1	31.1	30.2	30.2	30	29.8	29.7	30.3	34.1
2018-05-05 13:55:00	29.5	32	31.1	31.1	30.8	30.5	30.4	31.1	34.1
2018-05-05 14:55:00	29.9	32.8	31.9	31.9	31.6	31.3	31.2	31.9	34.9
2018-05-05 15:55:00	30.2	33.3	32.6	32.5	32.2	31.9	31.8	32.4	34.8
2018-05-05 16:56:00	30.6	33.7	33.1	33.1	32.8	32.4	32.3	32.8	34.2
2018-05-05 17:56:00	30.8	33.8	33.3	33.4	33.1	32.7	32.6	32.9	33.1
2018-05-05 18:56:00	30.8	33.5	33.3	33.6	33.3	32.9	32.8	32.9	31.5
2018-05-05 19:56:00	30.8	33.5	33.1	33.4	33.1	32.9	32.8	32.6	30.5
2018-05-05 20:56:00	30.8	32.6	32.6	33.1	32.9	32.6	32.5	32.1	29.6
2018-05-05 21:57:00	30.6	32	32.1	32.7	32.6	32.3	32.2	31.7	27
2018-05-05 22:57:00	30.1	30.8	31.1	31.8	31.8	31.5	31.4	30.4	23.5
2018-05-05 23:57:00	29.7	29.4	30.1	30.8	30.9	30.5	30.4	29.4	23.8
2018-11-05 00:23:00	28.1	26.8	26.8	27.5	27.8	27.7	27.6	27.1	24.9
2018-11-05 01:23:00	27.9	26.6	26.5	27.2	27.4	27.4	27.3	26.9	24.5
2018-11-05 02:23:00	27.8	26.3	26.2	26.9	27.1	27.1	27	26.6	24.2
2018-11-05 03:23:00	27.6	26.3	25.9	26.6	26.8	26.9	26.8	26.4	24.4
2018-11-05 04:24:00	27.4	25.9	25.7	26.3	26.6	26.6	26.5	26.2	24.4
2018-11-05 05:24:00	27.3	25.8	25.5	26.1	26.4	26.4	26.3	26	24.6
2018-11-05 06:24:00	27.1	25.7	25.4	25.9	26.1	26.2	26.1	25.8	24.4
2018-11-05 07:24:00	26.9	25.6	25.3	25.8	26	26	25.9	25.6	24.6
2018-11-05 08:24:00	26.9	25.8	25.3	25.8	26	26	25.9	25.7	26.4
2018-11-05 09:25:00	27.3	26.6	26	26.4	26.5	26.3	26.2	26.2	30.4
2018-11-05 10:25:00	27.8	26.6	27.2	27.3	27.3	27	26.9	27.1	32.6
2018-11-05 11:25:00	28.2	29.3	28.4	28.3	28.2	27.7	27.6	28.1	34.1
2018-11-05 12:25:00	28.7	30.4	29.4	29.3	29.2	28.6	28.5	29.1	34.3
2018-11-05 13:25:00	29.1	31.4	30.6	30.4	30.3	29.5	29.4	30.1	36.2
2018-11-05 14:26:00	29.5	32.4	31.6	31.4	31.1	30.5	30.4	31.1	37.1
2018-11-05 15:26:00	30.1	33.4	32.6	32.5	32.1	31.4	31.3	32.1	36.6
2018-11-05 16:26:00	30.6	34.2	33.4	33.3	32.9	32.3	32.2	32.8	36.4
2018-11-05 17:26:00	30.8	34.3	33.8	33.7	33.3	32.9	32.8	33	32.4
2018-11-05 18:26:00	30.4	32.7	33.3	33.4	33	32.7	32.6	32.2	22.4
2018-11-05 19:27:00	29.3	30.2	31.5	31.9	31.6	31	30.9	29.8	21.8
2018-11-05 20:27:00	28.8	28.8	30.1	30.9	30.8	30.1	30	28.8	23.4
2018-11-05 21:27:00	28.4	27.9	29.1	30.1	30.1	29.4	29.3	28.3	23.4
2018-11-05 22:27:00	27.9	27.2	28.1	29.1	29.3	28.7	28.6	27.6	23.2
2018-11-05 23:28:00	27.6	26.6	27.2	28.3	28.6	28.1	28	27.1	23.4
21/5/18 0:55:02	27.6	27.8	27.1	27.6	27.5	27.9	27.8	27.6	27.4
21/5/18 1:55:15	27.5	27.7	27.1	27.6	27.5	27.7	27.6	27.5	27.6
21/5/18 2:55:27	27.5	27.6	27.1	27.5	27.4	27.7	27.6	27.5	27.5
21/5/18 3:55:40	27.5	27.6	27.1	27.5	27.4	27.6	27.5	27.4	27.3
21/5/18 4:55:53	27.5	27.6	27.1	27.5	27.4	27.5	27.4	27.3	27.1
21/5/18 5:56:06	27.4	27.6	27	27.4	27.3	27.4	27.3	27.2	26.9
21/5/18 6:56:19	27.4	27.6	26.9	27.4	27.3	27.4	27.3	27.1	27.3
21/5/18 7:56:31	27.4	27.5	26.9	27.4	27.3	27.3	27.2	27.1	28.1
21/5/18 8:56:44	27.4	27.5	27.1	27.5	27.4	27.4	27.3	27.2	28.7
21/5/18 9:56:57	27.5	27.6	27.3	27.6	27.5	27.4	27.3	27.4	28.7
21/5/18 10:57:10	27.5	27.8	27.6	27.9	27.8	27.5	27.4	27.5	29.3
21/5/18 11:57:23	27.6	27.9	27.9	28.3	28.2	27.9	27.8	27.9	30.3
21/5/18 12:57:36	27.9	28.1	28.8	29	28.8	28.4	28.3	28.4	32.6
21/5/18 13:57:49	28.2	28.6	29.3	29.6	29.4	29	28.9	29.3	33.7
21/5/18 14:58:02	28.5		30.1	30.4	30.1	29.8	29.7	30.1	34.3
21/5/18 15:58:15	28.8	29.7	30.9	31.1	30.9	30.5	30.4	30.8	33.1
21/5/18 16:58:27	29	30.3	31.3	31.6	31.4	31	30.9	31.2	30.3
21/5/18 17:58:40	29.1	30.7	31.3	31.8	31.6	31.2	31.1	31.2	30.6
21/5/18 18:58:53	29.1	30.9	31	31.7	31.6	31.4	31.3	31.1	30.1
21/5/18 19:59:06	29.1	30.9	30.6	31.4	31.5	31.3	31.2	31	29
21/5/18 20:59:19	29.1	30.9	30.2	31.1	31.3	31.2	31.1	30.8	28.4
21/5/18 21:59:32	29.1	30.7	29.8	30.6	30.9	30.9	30.8	30.4	28
21/5/18 22:59:45	29	30.1	29.6	30.3	30.6	30.7	30.6	30.2	27.8
21/5/18 23:59:58	29	29.8	29.3	29.9	30.3	30.4	30.3	29.9	28
26/5/18 0:20:28	30.8	32.4	29.9	30.9	31.4	31.7	31.6	31.3	26.8
26/5/18 1:20:41	30.5	31.8	29.6	30.4	30.8	31.2	31.1	30.8	27.8
26/5/18 2:20:54	30.3	31.3	29.4	30	30.4	30.8	30.7	30.4	28.2
26/5/18 3:21:06	30.2	30.9	29.3	29.8	30	30.4	30.3	30.1	28.2
26/5/18 4:21:19	30.1	30.6	29.1	29.6	29.8	30.1	30	29.8	28.4
26/5/18 5:21:32	29.9	30.4	29.1	29.5	29.6	29.8	29.7	29.6	28.3
26/5/18 6:21:45	29.8	30.1	28.9	29.3	29.4	29.5	29.4	29.3	27.9
26/5/18 7:21:58	29.7	29.9	28.8	29.2	29.3	29.3	29.2	29.1	28.6
26/5/18 8:22:10	29.8	29.8	29.2	29.4	29.4	29.4	29.3	29.3	30.3
26/5/18 9:22:23	29.9	29.8	29.9	30	29.9	29.7	29.6	29.6	31.6
26/5/18 10:22:36	30.3	29.8	30.9	30.9	30.6	30.3	30.2	30.3	33.6
26/5/18 11:22:49	30.6	30.7	31.9	31.8	31.4	31	30.9	31.1	34.2
26/5/18 12:23:02	31	31.6	32.8	32.7	32.3	31.8	31.7	31.9	35
26/5/18 13:23:15	31.4	32.5	33.3	33.6	33.2	32.4	32.3	32.6	35.9
26/5/18 14:23:28	31.8	33	34	34.3	33.9	33.3	33.2	33.4	36.3
26/5/18 15:23:41	32.2	33.9	34.4	34.9	34.7	34.2	34.1	33.9	35.6
26/5/18 16:23:54	32.5	34.5	34.7	35.2	35.1	34.7	34.6	34.5	36.4
26/5/18 17:24:07	32.7	34.8	34.9	35.4	35.4	35.1	35	34.9	34.9
26/5/18 18:24:20	32.8	34.8	34.9	35.5	35.6	35.3	35.2	35.1	34.1
26/5/18 19:24:33	32.8	34.6	34.7	35.4	35.4	35.3	35.2	35	32.4
26/5/18 20:24:45	32.6	34.3	34	34.9	35.1	35	34.9	34.6	31.2
26/5/18 21:24:58	32.5	34.3	33.3	34.4	34.6	34.6	34.5	34.1	30.4
26/5/18 22:25:11	32.3	33.7	32.7	33.8	34.1	34.1	34	33.6	29.7
26/5/18 23:25:24	32.1	33.3	32.1	33.1	33.4	33.6	33.5	33.1	29
2018-02-06 00:50:00	28.1	26.8	26.8	27.5	27.8	27.7	27.6	27.1	24.9
2018-02-06 01:50:00	27.9	26.6	26.5	27.2	27.4	27.4	27.3	26.9	24.5
2018-02-06 02:50:00	27.8	26.3	26.2	26.9	27.1	27.1	27	26.6	24.2
2018-02-06 03:50:00	27.6	26.3	25.9	26.6	26.8	26.9	26.8	26.4	24.4
2018-02-06 04:50:00	27.4	25.9	25.7	26.3	26.6	26.6	26.5	26.2	24.4
2018-02-06 05:51:00	27.3	25.8	25.5	26.1	26.4	26.4	26.3	26	24.6
2018-02-06 06:51:00	27.1	25.7	25.4	25.9	26.1	26.2	26.1	25.8	24.4
2018-02-06 07:51:00	26.9	25.6	25.3	25.8	26	26	25.9	25.6	24.6
2018-02-06 08:51:00	26.9	25.8	25.3	25.8	26	26	25.9	25.7	26.4
2018-02-06 09:51:00	27.3	26.6	26	26.4	26.5	26.3	26.2	26.2	30.4
2018-02-06 10:51:00	27.8	26.6	27.2	27.3	27.3	27	26.9	27.1	32.6
2018-02-06 11:51:00	28.2	29.3	28.4	28.3	28.2	27.7	27.6	28.1	34.1
2018-02-06 12:51:00	28.7	30.4	29.4	29.3	29.2	28.6	28.5	29.1	34.3
2018-02-06 13:52:00	29.1	31.4	30.6	30.4	30.3	29.5	29.4	30.1	36.2
2018-02-06 14:52:00	29.5	32.4	31.6	31.4	31.1	30.5	30.4	31.1	37.1
2018-02-06 15:52:00	30.1	33.4	32.6	32.5	32.1	31.4	31.3	32.1	36.6
2018-02-06 16:52:00	30.6	34.2	33.4	33.3	32.9	32.3	32.2	32.8	36.4
2018-02-06 17:52:00	30.8	34.3	33.8	33.7	33.3	32.9	32.8	33	32.4
2018-02-06 18:52:00	30.4	32.7	33.3	33.4	33	32.7	32.6	32.2	22.4
2018-02-06 19:52:00	29.3	30.2	31.5	31.9	31.6	31	30.9	29.8	21.8
2018-02-06 20:53:00	28.8	28.8	30.1	30.9	30.8	30.1	30	28.8	23.4
2018-02-06 21:53:00	28.4	27.9	29.1	30.1	30.1	29.4	29.3	28.3	23.4
2018-02-06 22:53:00	27.9	27.2	28.1	29.1	29.3	28.7	28.6	27.6	23.2
2018-02-06 23:53:00	27.6	26.6	27.2	28.3	28.6	28.1	28	27.1	23.4
23/7/18 0:08:38	27.6	27.8	27.1	27.6	27.5	27.9	27.8	27.6	27.4
23/7/18 1:08:47	27.5	27.7	27.1	27.6	27.5	27.7	27.6	27.5	27.6
23/7/18 2:08:55	27.5	27.6	27.1	27.5	27.4	27.7	27.6	27.5	27.5
23/7/18 3:09:03	27.5	27.6	27.1	27.5	27.4	27.6	27.5	27.4	27.3
23/7/18 4:09:11	27.5	27.6	27.1	27.5	27.4	27.5	27.4	27.3	27.1
23/7/18 5:09:19	27.4	27.6	27	27.4	27.3	27.4	27.3	27.2	26.9
23/7/18 6:09:28	27.4	27.6	26.9	27.4	27.3	27.4	27.3	27.1	27.3
23/7/18 7:09:36	27.4	27.5	26.9	27.4	27.3	27.3	27.2	27.1	28.1
23/7/18 8:09:44	27.4	27.5	27.1	27.5	27.4	27.4	27.3	27.2	28.7
23/7/18 9:09:52	27.5	27.6	27.3	27.6	27.5	27.4	27.3	27.4	28.7
23/7/18 10:10:01	27.5	27.8	27.6	27.9	27.8	27.5	27.4	27.5	29.3
23/7/18 11:10:09	27.6	27.9	27.9	28.3	28.2	27.9	27.8	27.9	30.3
23/7/18 12:10:17	27.9	28.1	28.8	29	28.8	28.4	28.3	28.4	32.6
23/7/18 13:10:25	28.2	28.6	29.3	29.6	29.4	29	28.9	29.3	33.7
23/7/18 14:10:34	28.5		30.1	30.4	30.1	29.8	29.7	30.1	34.3
23/7/18 15:10:42	28.8	29.7	30.9	31.1	30.9	30.5	30.4	30.8	33.1
23/7/18 16:10:50	29	30.3	31.3	31.6	31.4	31	30.9	31.2	30.3
23/7/18 17:10:58	29.1	30.7	31.3	31.8	31.6	31.2	31.1	31.2	30.6
23/7/18 18:11:06	29.1	30.9	31	31.7	31.6	31.4	31.3	31.1	30.1
23/7/18 19:11:15	29.1	30.9	30.6	31.4	31.5	31.3	31.2	31	29
23/7/18 20:11:23	29.1	30.9	30.2	31.1	31.3	31.2	31.1	30.8	28.4
23/7/18 21:11:31	29.1	30.7	29.8	30.6	30.9	30.9	30.8	30.4	28
23/7/18 22:11:39	29	30.1	29.6	30.3	30.6	30.7	30.6	30.2	27.8
23/7/18 23:11:47	29	29.8	29.3	29.9	30.3	30.4	30.3	29.9	28
28/7/18 0:25:06	30.8	32.4	29.9	30.9	31.4	31.7	31.6	31.3	26.8
28/7/18 1:25:14	30.5	31.8	29.6	30.4	30.8	31.2	31.1	30.8	27.8
28/7/18 2:25:23	30.3	31.3	29.4	30	30.4	30.8	30.7	30.4	28.2
28/7/18 3:25:31	30.2	30.9	29.3	29.8	30	30.4	30.3	30.1	28.2
28/7/18 4:25:39	30.1	30.6	29.1	29.6	29.8	30.1	30	29.8	28.4
28/7/18 5:25:47	29.9	30.4	29.1	29.5	29.6	29.8	29.7	29.6	28.3
28/7/18 6:25:55	29.8	30.1	28.9	29.3	29.4	29.5	29.4	29.3	27.9
28/7/18 7:26:04	29.7	29.9	28.8	29.2	29.3	29.3	29.2	29.1	28.6
28/7/18 8:26:12	29.8	29.8	29.2	29.4	29.4	29.4	29.3	29.3	30.3
28/7/18 9:26:20	29.9	29.8	29.9	30	29.9	29.7	29.6	29.6	31.6
28/7/18 10:26:28	30.3	29.8	30.9	30.9	30.6	30.3	30.2	30.3	33.6
28/7/18 12:05:19	30.6	30.7	31.9	31.8	31.4	31	30.9	31.1	34.2
28/7/18 13:05:27	31	31.6	32.8	32.7	32.3	31.8	31.7	31.9	35
28/7/18 14:05:36	31.4	32.5	33.3	33.6	33.2	32.4	32.3	32.6	35.9
28/7/18 15:05:44	31.8	33	34	34.3	33.9	33.3	33.2	33.4	36.3
28/7/18 16:05:52	32.2	33.9	34.4	34.9	34.7	34.2	34.1	33.9	35.6
28/7/18 17:06:01	32.5	34.5	34.7	35.2	35.1	34.7	34.6	34.5	36.4
28/7/18 18:06:09	32.7	34.8	34.9	35.4	35.4	35.1	35	34.9	34.9
28/7/18 19:06:17	32.8	34.8	34.9	35.5	35.6	35.3	35.2	35.1	34.1
28/7/18 20:06:25	32.8	34.6	34.7	35.4	35.4	35.3	35.2	35	32.4
28/7/18 21:06:34	32.6	34.3	34	34.9	35.1	35	34.9	34.6	31.2
28/7/18 22:06:42	32.5	34.3	33.3	34.4	34.6	34.6	34.5	34.1	30.4
28/7/18 23:06:50	32.3	33.7	32.7	33.8	34.1	34.1	34	33.6	29.7
2018-04-08 00:26:00	28.1	26.8	26.8	27.5	27.8	27.7	27.6	27.1	24.9
2018-04-08 01:26:00	27.9	26.6	26.5	27.2	27.4	27.4	27.3	26.9	24.5
2018-04-08 02:27:00	27.8	26.3	26.2	26.9	27.1	27.1	27	26.6	24.2
2018-04-08 03:27:00	27.6	26.3	25.9	26.6	26.8	26.9	26.8	26.4	24.4
2018-04-08 04:27:00	27.4	25.9	25.7	26.3	26.6	26.6	26.5	26.2	24.4
2018-04-08 05:27:00	27.3	25.8	25.5	26.1	26.4	26.4	26.3	26	24.6
2018-04-08 06:27:00	27.1	25.7	25.4	25.9	26.1	26.2	26.1	25.8	24.4
2018-04-08 07:27:00	26.9	25.6	25.3	25.8	26	26	25.9	25.6	24.6
2018-04-08 08:27:00	26.9	25.8	25.3	25.8	26	26	25.9	25.7	26.4
2018-04-08 09:28:00	27.3	26.6	26	26.4	26.5	26.3	26.2	26.2	30.4
2018-04-08 10:28:00	27.8	26.6	27.2	27.3	27.3	27	26.9	27.1	32.6
2018-04-08 11:28:00	28.2	29.3	28.4	28.3	28.2	27.7	27.6	28.1	34.1
2018-04-08 12:28:00	28.7	30.4	29.4	29.3	29.2	28.6	28.5	29.1	34.3
2018-04-08 13:28:00	29.1	31.4	30.6	30.4	30.3	29.5	29.4	30.1	36.2
2018-04-08 14:28:00	29.5	32.4	31.6	31.4	31.1	30.5	30.4	31.1	37.1
2018-04-08 15:28:00	30.1	33.4	32.6	32.5	32.1	31.4	31.3	32.1	36.6
2018-04-08 16:29:00	30.6	34.2	33.4	33.3	32.9	32.3	32.2	32.8	36.4
2018-04-08 17:29:00	30.8	34.3	33.8	33.7	33.3	32.9	32.8	33	32.4
2018-04-08 18:29:00	30.4	32.7	33.3	33.4	33	32.7	32.6	32.2	22.4
2018-04-08 19:29:00	29.3	30.2	31.5	31.9	31.6	31	30.9	29.8	21.8
2018-04-08 20:29:00	28.8	28.8	30.1	30.9	30.8	30.1	30	28.8	23.4
2018-04-08 21:29:00	28.4	27.9	29.1	30.1	30.1	29.4	29.3	28.3	23.4
2018-04-08 22:29:00	27.9	27.2	28.1	29.1	29.3	28.7	28.6	27.6	23.2
2018-04-08 23:29:00	27.6	26.6	27.2	28.3	28.6	28.1	28	27.1	23.4
2018-11-08 00:50:00	27.6	27.8	27.1	27.6	27.5	27.9	27.8	27.6	27.4
2018-11-08 01:50:00	27.5	27.7	27.1	27.6	27.5	27.7	27.6	27.5	27.6
2018-11-08 02:50:00	27.5	27.6	27.1	27.5	27.4	27.7	27.6	27.5	27.5
2018-11-08 03:50:00	27.5	27.6	27.1	27.5	27.4	27.6	27.5	27.4	27.3
2018-11-08 04:50:00	27.5	27.6	27.1	27.5	27.4	27.5	27.4	27.3	27.1
2018-11-08 05:50:00	27.4	27.6	27	27.4	27.3	27.4	27.3	27.2	26.9
2018-11-08 06:50:00	27.4	27.6	26.9	27.4	27.3	27.4	27.3	27.1	27.3
2018-11-08 07:51:00	27.4	27.5	26.9	27.4	27.3	27.3	27.2	27.1	28.1
2018-11-08 08:51:00	27.4	27.5	27.1	27.5	27.4	27.4	27.3	27.2	28.7
2018-11-08 09:51:00	27.5	27.6	27.3	27.6	27.5	27.4	27.3	27.4	28.7
2018-11-08 10:51:00	27.5	27.8	27.6	27.9	27.8	27.5	27.4	27.5	29.3
2018-11-08 11:51:00	27.6	27.9	27.9	28.3	28.2	27.9	27.8	27.9	30.3
2018-11-08 12:51:00	27.9	28.1	28.8	29	28.8	28.4	28.3	28.4	32.6
2018-11-08 13:51:00	28.2	28.6	29.3	29.6	29.4	29	28.9	29.3	33.7
2018-11-08 14:51:00	28.5		30.1	30.4	30.1	29.8	29.7	30.1	34.3
2018-11-08 15:52:00	28.8	29.7	30.9	31.1	30.9	30.5	30.4	30.8	33.1
2018-11-08 16:52:00	29	30.3	31.3	31.6	31.4	31	30.9	31.2	30.3
2018-11-08 17:52:00	29.1	30.7	31.3	31.8	31.6	31.2	31.1	31.2	30.6
2018-11-08 18:52:00	29.1	30.9	31	31.7	31.6	31.4	31.3	31.1	30.1
2018-11-08 19:52:00	29.1	30.9	30.6	31.4	31.5	31.3	31.2	31	29
2018-11-08 20:52:00	29.1	30.9	30.2	31.1	31.3	31.2	31.1	30.8	28.4
2018-11-08 21:52:00	29.1	30.7	29.8	30.6	30.9	30.9	30.8	30.4	28
2018-11-08 22:53:00	29	30.1	29.6	30.3	30.6	30.7	30.6	30.2	27.8
2018-11-08 23:53:00	29	29.8	29.3	29.9	30.3	30.4	30.3	29.9	28
23/8/18 0:29:43	30.8	32.4	29.9	30.9	31.4	31.7	31.6	31.3	26.8
23/8/18 1:29:52	30.5	31.8	29.6	30.4	30.8	31.2	31.1	30.8	27.8
23/8/18 2:30:00	30.3	31.3	29.4	30	30.4	30.8	30.7	30.4	28.2
23/8/18 3:30:08	30.2	30.9	29.3	29.8	30	30.4	30.3	30.1	28.2
23/8/18 4:30:16	30.1	30.6	29.1	29.6	29.8	30.1	30	29.8	28.4
23/8/18 5:30:24	29.9	30.4	29.1	29.5	29.6	29.8	29.7	29.6	28.3
23/8/18 6:30:33	29.8	30.1	28.9	29.3	29.4	29.5	29.4	29.3	27.9
23/8/18 7:30:41	29.7	29.9	28.8	29.2	29.3	29.3	29.2	29.1	28.6
23/8/18 8:30:49	29.8	29.8	29.2	29.4	29.4	29.4	29.3	29.3	30.3
23/8/18 9:30:57	29.9	29.8	29.9	30	29.9	29.7	29.6	29.6	31.6
23/8/18 10:31:06	30.3	29.8	30.9	30.9	30.6	30.3	30.2	30.3	33.6
23/8/18 11:31:14	30.6	30.7	31.9	31.8	31.4	31	30.9	31.1	34.2
23/8/18 12:31:22	31	31.6	32.8	32.7	32.3	31.8	31.7	31.9	35
23/8/18 13:31:31	31.4	32.5	33.3	33.6	33.2	32.4	32.3	32.6	35.9
23/8/18 14:31:39	31.8	33	34	34.3	33.9	33.3	33.2	33.4	36.3
23/8/18 15:31:47	32.2	33.9	34.4	34.9	34.7	34.2	34.1	33.9	35.6
23/8/18 16:31:56	32.5	34.5	34.7	35.2	35.1	34.7	34.6	34.5	36.4
23/8/18 17:32:04	32.7	34.8	34.9	35.4	35.4	35.1	35	34.9	34.9
23/8/18 18:32:13	32.8	34.8	34.9	35.5	35.6	35.3	35.2	35.1	34.1
23/8/18 19:32:21	32.8	34.6	34.7	35.4	35.4	35.3	35.2	35	32.4
23/8/18 20:32:29	32.6	34.3	34	34.9	35.1	35	34.9	34.6	31.2
23/8/18 21:32:38	32.5	34.3	33.3	34.4	34.6	34.6	34.5	34.1	30.4
23/8/18 22:32:46	32.3	33.7	32.7	33.8	34.1	34.1	34	33.6	29.7
23/8/18 23:32:54	32.1	33.3	32.1	33.1	33.4	33.6	33.5	33.1	29

## Sheet: HABR (I)
Temperature data of HABR (I).
Date and Time	Raw (Down)	I-1	I-2	I-3	I-4	I-5	I-6	I-7	Air Temp	Air Temp
2018-06-04 00:34:00	22.7	28.6	28.5	28.3	28.2	28.4	28.7	28.6	22.6	22.8
2018-06-04 01:34:00	22.9	28.4	28.4	28.3	28.1	28.3	28.6	28.4	22.7	22.9
2018-06-04 02:35:00	22.4	28.4	28.4	28.1	28.1	28.3	28.5	28.3	21.8	22.1
2018-06-04 03:35:00	21.6	28.3	28.3	28.1	28	28.2	28.4	28.2	21.1	21.4
2018-06-04 04:35:00	21.4	28.1	28.2	28	27.9	28.1	28.3	28.1	20.9	21.3
2018-06-04 05:35:00	21.5	28.1	28.1	27.9	27.8	28	28.2	27.9	21.3	21.6
2018-06-04 06:35:00	22.1	27.9	28	27.9	27.8	27.9	28.1	27.8	22.1	22.3
2018-06-04 07:35:00	22.9	27.9	27.9	27.8	27.7	27.8	28	27.7	22.8	23.1
2018-06-04 08:35:00	24.3	27.8	27.9	27.8	27.6	27.8	27.9	27.6	23.9	23.9
2018-06-04 09:36:00	25.9	27.8	27.8	27.7	27.6	27.8	27.9	27.6	25.5	25.4
2018-06-04 10:36:00	28.6	27.7	27.8	27.7	27.6	27.7	27.8	27.6	28.1	27.8
2018-06-04 11:36:00	31.1	27.7	27.8	27.7	27.6	27.7	27.8	27.6	30.3	29.6
2018-06-04 12:36:00	32.5	27.8	27.8	27.7	27.6	27.7	27.8	27.6	31.7	30.9
2018-06-04 13:36:00	33.8	27.8	27.8	27.7	27.6	27.8	27.9	27.8	33.8	32.1
2018-06-04 14:36:00	34.6	27.9	27.9	27.8	27.7	27.8	27.9	27.9	34.8	33.3
2018-06-04 15:36:00	34	28	28	27.8	27.8	27.9	28	28.1	34.1	32.7
2018-06-04 16:36:00	33.4	28.1	28.1	27.9	27.8	27.9	28.1	28.2	33.9	32.8
2018-06-04 17:37:00	32.9	28.3	28.2	28	27.9	28.1	28.3	28.4	33.3	32.6
2018-06-04 18:37:00	30.8	28.3	28.3	28.1	27.9	28.1	28.3	28.4	30.3	30.3
2018-06-04 19:37:00	29.3	28.4	28.3	28.1	28	28.2	28.4	28.6	28.9	29.1
2018-06-04 20:37:00	28.6	28.4	28.4	28.1	28.1	28.3	28.5	28.6	28.3	28.4
2018-06-04 21:37:00	27.1	28.5	28.4	28.2	28.1	28.3	28.5	28.6	26	26.3
2018-06-04 22:37:00	25.2	28.5	28.4	28.2	28.1	28.3	28.5	28.6	24.1	24.5
2018-06-04 23:37:00	24.9	28.5	28.4	28.2	28.1	28.3	28.5	28.6	24.4	24.6
2018-08-04 00:41:00	21.1	28.5	28.4	28.3	28.1	28.3	28.6	28.5	21.3	20.8
2018-08-04 01:41:00	21.3	28.4	28.4	28.2	28.1	28.3	28.5	28.4	21.5	21.6
2018-08-04 02:41:00	21.4	28.3	28.3	28.1	28	28.1	28.4	28.2	21.4	21.6
2018-08-04 03:41:00	21.3	28.2	28.2	28	27.9	28.1	28.3	28.1	21.3	21.4
2018-08-04 04:41:00	21.3	28.1	28.1	27.9	27.8	28	28.2	27.9	21.2	21.3
2018-08-04 05:41:00	21.6	27.9	28.1	27.9	27.8	27.9	28.1	27.9	21.5	21.7
2018-08-04 06:42:00	21.8	27.9	27.9	27.8	27.7	27.8	28	27.8	21.5	21.7
2018-08-04 07:42:00	21.9	27.8	27.9	27.8	27.6	27.8	27.9	27.6	21.8	21.9
2018-08-04 08:42:00	24	27.7	27.8	27.7	27.6	27.7	27.8	27.6	23.3	23.4
2018-08-04 09:42:00	26.1	27.7	27.8	27.6	27.5	27.6	27.8	27.5	25.1	25
2018-08-04 10:42:00	28.3	27.6	27.8	27.6	27.5	27.6	27.8	27.4	27.2	26.9
2018-08-04 11:42:00	30.6	27.1	27.4	27.6	27.5	27.6	27.7	27.5	28.8	28.2
2018-08-04 12:42:00	32.1	27	27.3	27.3	27.4	27.6	27.8	27.6	30.1	29.8
2018-08-04 13:43:00	30.5	27.3	27.3	27.3	27.4	27.6	27.8	27.7	31.6	30.2
2018-08-04 14:43:00	30.9	27.5	27.3	27.3	27.4	27.6	27.9	27.9	32.1	31.3
2018-08-04 15:43:00	31.2	27.8	27.4	27.3	27.4	27.7	27.9	27.9	33.8	33.1
2018-08-04 16:43:00	32.3	28.2	27.7	27.4	27.4	27.7	27.9	28	33.1	32.1
2018-08-04 17:43:00	31	28.6	27.9	27.5	27.4	27.8	28	28.1	31.3	30.7
2018-08-04 18:43:00	28.6	28.8	28.2	27.7	27.5	27.8	28.1	28.1	29.6	29.4
2018-08-04 19:43:00	28.6	28.9	28.4	27.8	27.6	27.8	28.1	28.2	27.4	27.5
2018-08-04 20:44:00	28.5	28.9	28.5	27.9	27.7	27.8	28.1	28.2	26.2	26.4
2018-08-04 21:44:00	28.4	28.9	28.6	28.1	27.8	27.9	28.1	28.1	25.5	25.6
2018-08-04 22:44:00	28.2	28.7	28.6	28.1	27.8	27.9	28.1	28.1	25.5	25.4
2018-08-04 23:44:00	28	28.5	28.6	28.2	27.9	27.9	28.1	28.1	25.3	25.1
2018-11-04 00:51:00	29.1	29.2	29.3	28.8	28.4	28.4	28.5	28.5	26.1	26.1
2018-11-04 01:51:00	28.8	29	29.3	28.9	28.5	28.4	28.6	28.5	25.8	25.7
2018-11-04 02:51:00	28.7	28.8	29.1	28.9	28.6	28.4	28.6	28.4	25.4	25.4
2018-11-04 03:51:00	28.5	28.6	29	28.9	28.6	28.5	28.6	28.4	25.3	25.2
2018-11-04 04:51:00	28.3	28.4	28.9	28.8	28.6	28.6	28.6	28.4	24.9	24.9
2018-11-04 05:51:00	28.1	28.2	28.8	28.8	28.6	28.6	28.6	28.4	24.7	24.6
2018-11-04 06:51:00	27.9	27.9	28.6	28.7	28.6	28.6	28.6	28.4	24.6	24.6
2018-11-04 07:52:00	27.8	27.8	28.4	28.6	28.5	28.6	28.6	28.4	25.6	25.6
2018-11-04 08:52:00	27.9	27.7	28.3	28.4	28.5	28.6	28.6	28.4	27.9	27.8
2018-11-04 09:52:00	28.3	27.8	28.1	28.3	28.4	28.6	28.6	28.4	29.9	29.9
2018-11-04 10:52:00	28.7	27.9	28.1	28.3	28.4	28.6	28.7	28.6	31.2	31.1
2018-11-04 11:52:00	29.1	28.2	28.1	28.2	28.4	28.6	28.8	28.6	33.2	33.1
2018-11-04 12:52:00	29.4	28.6	28.3	28.2	28.3	28.6	28.8	28.8	34.1	34
2018-11-04 13:52:00	29.8	29	28.4	28.3	28.3	28.7	28.9	28.9	33.7	33.6
2018-11-04 14:52:00	30.1	29.4	28.8	28.4	28.4	28.7	28.9	28.9	34.8	34.7
2018-11-04 15:53:00	30.5	29.8	29	28.5	28.4	28.7	29	29.1	34.6	34.5
2018-11-04 16:53:00	31	30.3	29.3	28.7	28.5	28.8	29	29.1	33.7	33.6
2018-11-04 17:53:00	31.2	30.6	29.6	28.9	28.6	28.8	29.1	29.2	32.6	32.5
2018-11-04 18:53:00	31.2	30.8	29.9	29.1	28.8	28.9	29.1	29.3	31.3	31.2
2018-11-04 19:53:00	31.1	30.9	30.1	29.3	28.9	28.9	29.1	29.3	30.3	30.2
2018-11-04 20:53:00	30.9	30.9	30.3	29.5	29	29	29.2	29.3	29.1	29.1
2018-11-04 21:53:00	30.7	30.8	30.4	29.6	29.1	29.1	29.3	29.3	28.3	28.2
2018-11-04 22:54:00	30.4	30.6	30.4	29.8	29.3	29.1	29.3	29.3	27.6	27.4
2018-11-04 23:54:00	30.2	30.4	30.4	29.9	29.4	29.3	29.3	29.2	27.6	27.5
13/4/18 0:57:34	27.5	28	29	28.9	28.6	28.6	28.8	28.8	22.1	22
13/4/18 1:57:42	27.2	27.6	28.7	28.8	28.6	28.6	28.7	28.6	21.9	21.8
13/4/18 2:57:50	26.9	27.3	28.4	28.7	28.6	28.6	28.6	28.5	21.5	21.5
13/4/18 3:57:58	26.6	26.9	28	28.5	28.5	28.5	28.6	28.4	21.3	21.3
13/4/18 4:58:06	26.3	26.5	27.7	28.3	28.4	28.5	28.6	28.4	21.3	21.3
13/4/18 5:58:14	26	26.1	27.4	28	28.3	28.4	28.6	28.3	21.4	21.4
13/4/18 6:58:22	25.8	25.9	27	27.7	28.1	28.4	28.5	28.3	21.8	21.7
13/4/18 7:58:30	25.8	25.6	26.8	27.4	27.9	28.3	28.4	28.3	23.6	23.6
13/4/18 8:58:38	26.1	25.6	26.4	27.2	27.7	28.2	28.4	28.2	26.7	26.8
13/4/18 9:58:46	26.9	25.8	26.3	26.9	27.5	28.1	28.4	28.3	29.3	29.3
13/4/18 10:58:54	27.4	26.1	26.3	26.8	27.4	28	28.3	28.3	31.4	31.3
13/4/18 11:59:02	28	26.5	26.4	26.7	27.3	27.9	28.3	28.3	32	32
13/4/18 12:59:10	28.2	27.4	26.8	26.6	27	27.8	28.3	28.4	32.9	32.8
13/4/18 13:59:18	28.6	27.8	27	26.7	26.9	27.7	28.2	28.4	34.1	33.9
13/4/18 14:59:26	28.9	28.3	27.4	26.9	27	27.6	28.2	28.5	34.3	34.2
13/4/18 15:59:35	29.4	28.7	27.8	27.1	27.1	27.6	28.2	28.5	33.2	33.2
13/4/18 16:59:43	29.9	29.1	28.1	27.3	27.2	27.6	28.1	28.6	33.3	33.3
13/4/18 17:59:51	30.1	29.4	28.4	27.6	27.3	27.6	28.1	28.5	31.9	31.9
13/4/18 18:59:59	30.1	29.7	28.8	27.8	27.4	27.7	28.1	28.5	30	30
13/4/18 20:00:08	29.9	29.8	28.9	28.1	27.6	27.8	28.1	28.4	28.4	28.4
13/4/18 21:00:16	29.8	29.8	29.1	28.3	27.8	27.8	28.1	28.3	28.2	28.2
13/4/18 22:00:24	29.6	29.6	29.3	28.4	27.9	27.9	28.1	28.3	27.4	27.4
13/4/18 23:00:32	29.4	29.5	29.3	28.6	28	27.9	28.1	28.2	26.7	26.7
20/4/18 0:20:20	30.8	31.1	31.3	30.8	30.3	30.1	30.1	29.9	27.3	27.3
20/4/18 1:20:28	30.4	30.9	31.3	30.8	30.3	30.1	30.1	30	27.2	27.2
20/4/18 2:20:36	30.2	30.7	31.1	30.8	30.4	30.2	30.2	30	27	27
20/4/18 3:20:44	29.9	30.4	31	30.8	30.4	30.3	30.2	30	26.8	26.7
20/4/18 4:20:52	29.7	30.3	30.8	30.8	30.4	30.3	30.3	30	26.4	26.4
20/4/18 5:21:00	29.4	30	30.6	30.7	30.5	30.4	30.3	30.1	26.4	26.4
20/4/18 6:21:09	29.3	29.8	30.4	30.6	30.4	30.4	30.3	30.1	26.6	26.6
20/4/18 7:21:17	29.1	29.6	30.3	30.5	30.4	30.4	30.4	30.1	27.4	27.4
20/4/18 8:21:25	29.1	29.5	30.1	30.4	30.4	30.4	30.4	30.1	29.6	29.6
20/4/18 9:21:33	29.3	29.6	30	30.3	30.3	30.4	30.4	30.2	30.8	30.8
20/4/18 10:21:41	29.9	29.7	29.9	30.2	30.3	30.4	30.5	30.3	31.7	31.7
20/4/18 11:21:50	30.4	29.9	29.9	30.1	30.3	30.4	30.5	30.3	33.5	33.4
20/4/18 12:21:58	30.8	30.2	30	30.1	30.3	30.4	30.6	30.4	35.3	35.3
20/4/18 13:22:06	31.3	30.6	30.2	30.1	30.3	30.5	30.6	30.6	35.8	35.8
20/4/18 14:22:14	31.6	31	30.4	30.2	30.3	30.5	30.7	30.6	36.7	36.6
20/4/18 15:22:23	32.1	31.4	30.7	30.3	30.3	30.6	30.8	30.8	35.9	35.8
20/4/18 16:22:31	32.6	31.8	30.9	30.4	30.4	30.6	30.8	30.9	36.3	36.3
20/4/18 17:22:39	33	32.2	31.3	30.6	30.4	30.6	30.9	31	34.3	34.3
20/4/18 18:22:48	33.1	32.5	31.6	30.8	30.6	30.7	30.9	31	32.5	32.5
20/4/18 19:22:56	32.9	32.6	31.8	31.1	30.7	30.8	31	31.1	30.8	30.8
20/4/18 20:23:04	32.6	32.6	32	31.2	30.8	30.8	31	31.1	29.8	29.9
20/4/18 21:23:13	32.4	32.4	32.1	31.4	30.9	30.9	31	31.1	29.1	29.1
20/4/18 22:23:21	32	32.3	32.1	31.5	31	30.9	31.1	31	28.6	28.6
20/4/18 23:23:29	31.7	32	32.1	31.6	31.1	31	31.1	31	28.1	28.1
24/4/18 0:33:27	29.4	30.7	30.9	30.3	29.6	29.3	29.3	29.2	27.4	27.4
24/4/18 1:33:35	29.3	30.4	30.9	30.3	29.7	29.4	29.3	29.2	26.5	26.5
24/4/18 2:33:43	29.1	30.2	30.8	30.4	29.8	29.5	29.4	29.2	25.9	25.9
24/4/18 3:33:52	29	29.9	30.6	30.4	29.9	29.6	29.4	29.2	25.9	25.9
24/4/18 4:34:00	28.9	29.7	30.4	30.4	29.9	29.7	29.5	29.3	25.5	25.5
24/4/18 5:34:08	28.8	29.4	30.2	30.3	29.9	29.7	29.6	29.3	25.1	25.1
24/4/18 6:34:16	28.6	29.1	29.9	30.1	29.9	29.8	29.6	29.3	24.9	24.9
24/4/18 7:34:24	28.5	28.9	29.8	30	29.9	29.8	29.7	29.3	26.9	26.8
24/4/18 8:34:32	28.5	28.8	29.6	29.9	29.9	29.8	29.7	29.3	29.9	29.9
24/4/18 9:34:40	28.9	28.9	29.4	29.8	29.8	29.8	29.7	29.4	32.3	32.1
24/4/18 10:34:48	29.3	29.1	29.3	29.6	29.8	29.9	29.8	29.5	33.5	33.4
24/4/18 11:34:57	29.7	29.3	29.4	29.6	29.8	29.9	29.9	29.7	35.1	34.8
24/4/18 12:35:05	30.1	29.7	29.5	29.5	29.8	30	30	29.8	36.1	35.9
24/4/18 13:35:13	30.5	30.1	29.7	29.6	29.7	30	30.1	30	35.3	35.1
24/4/18 14:35:22	30.8	30.6	30	29.7	29.8	30	30.2	30.1	37.4	37.3
24/4/18 15:35:30	31.3	31.1	30.3	29.8	29.8	30.1	30.3	30.3	37.6	37.4
24/4/18 16:35:38	31.7	31.6	30.7	30.1	29.9	30.1	30.3	30.4	36.3	36.3
24/4/18 17:35:47	32.1	31.9	31	30.3	30.1	30.2	30.4	30.5	34.9	35
24/4/18 18:35:55	32.4	32.1	31.4	30.6	30.2	30.3	30.5	30.6	32.7	32.7
24/4/18 19:36:03	32.3	32.3	31.6	30.8	30.3	30.4	30.6	30.7	31	31
24/4/18 20:36:12	32.3	32.3	31.8	31	30.4	30.4	30.6	30.7	30.3	30.3
24/4/18 21:36:20	32.1	32.3	31.9	31.2	30.6	30.5	30.6	30.7	29.8	29.8
24/4/18 22:36:28	31.9	32.2	32	31.3	30.8	30.6	30.7	30.7	28.8	28.8
24/4/18 23:36:36	31.7	32	32	31.4	30.9	30.7	30.8	30.7	28.2	28.3
2018-03-05 00:19:00	26.4	26.2	27.3	27.7	27.6	27.6	27.6	27.3	21.9	21.9
2018-03-05 01:19:00	26.2	26	26.9	27.4	27.6	27.6	27.6	27.3	21.8	21.8
2018-03-05 02:19:00	25.9	25.8	26.7	27.3	27.4	27.6	27.6	27.3	21.3	21.4
2018-03-05 03:19:00	25.8	25.5	26.4	27	27.3	27.5	27.6	27.3	21.3	21.4
2018-03-05 04:19:00	25.6	25.3	26.2	26.8	27.1	27.4	27.6	27.3	21.2	21.3
2018-03-05 05:20:00	25.3		25.9	26.5	26.9	27.4	27.5	27.3	21.1	21.1
2018-03-05 06:20:00	25.2	24.9	25.8	26.3	26.8	27.2	27.4	27.2	21.4	21.4
2018-03-05 07:20:00	25.1	24.7	25.5	26.1	26.6	27.1	27.4	27.2	22.7	22.8
2018-03-05 08:20:00	25	24.7	25.3	25.9	26.4	26.9	27.3	27.1	23.8	23.8
2018-03-05 09:20:00	25.3	24.8	25.2	25.7	26.2	26.8	27.2	27.1	26.8	26.7
2018-03-05 10:20:00	25.8	24.9	25.1	25.5	26.1	26.7	27.1	27.1	28.7	28.6
2018-03-05 11:20:00	26.1	25.1	25.3	25.4	25.9	26.6	27.1	27.2	31.2	31.2
2018-03-05 12:21:00	26.6	25.4	25.4	25.4	25.9	26.5	27	27.2	33.9	33.6
2018-03-05 13:21:00	27	25.8	25.8	25.5	25.8	26.5	27	27.3	34.1	33.9
2018-03-05 14:21:00	27.4	26.3	26.1	25.7	25.8	26.4	27	27.3	32.8	32.6
2018-03-05 15:21:00	27.8	26.8	26.5	25.9	25.9	26.4	27	27.3	33.3	33.1
2018-03-05 16:21:00	28.3	27.1	26.9	26.2	26	26.4	27	27.4	33.4	33.3
2018-03-05 17:21:00	28.8	27.6	27.6	26.6	26.2	26.4	26.9	27.3	32.3	32.3
2018-03-05 18:21:00	28.9		27.9	26.8	26.3	26.6	27	27.4	30.9	31
2018-03-05 19:22:00	28.9	28.3	28.1	27.1	26.6	26.6	27	27.4	29.1	29.1
2018-03-05 20:22:00	28.9	28.4	28.4	27.4	26.8	26.7	27	27.3	27.9	27.9
2018-03-05 21:22:00	28.8	28.6	28.5	27.6	26.9	26.8	27	27.3	27.4	27.4
2018-03-05 22:22:00	28.7	28.6	28.6	27.8	27.1	26.9	27.1	27.2	27.2	27.2
2018-03-05 23:22:00	28.6	28.6	28.6	27.9	27.3	27.1	27.1	27.2	26.4	26.4
2018-05-05 00:25:00	28.5	28.4	28.9	28.9	28.8	28.7	28.8	28.5	25.6	25.6
2018-05-05 01:26:00	28.4	28.3	28.8	28.9	28.8	28.7	28.8	28.6	25.8	25.8
2018-05-05 02:26:00	28.3	28.2	28.7	28.8	28.8	28.8	28.8	28.6	25.9	25.9
2018-05-05 03:26:00	28.1		28.5	28.7	28.7	28.8	28.8	28.6	25.9	25.9
2018-05-05 04:26:00	27.9	27.9	28.4	28.6	28.6	28.8	28.8	28.6	25.6	25.6
2018-05-05 05:26:00	27.8	27.9	28.3	28.4	28.6	28.7	28.8	28.6	25.8	25.8
2018-05-05 06:26:00	27.8	27.8	28.1	28.3	28.5	28.7	28.8	28.6	25.8	25.8
2018-05-05 07:26:00	27.6	27.7	28.1	28.3	28.4	28.6	28.8	28.6	22.6	22.4
2018-05-05 08:27:00	27.3	27.4	27.9	28.1	28.3	28.6	28.8	28.6	27.4	27.3
2018-05-05 09:27:00	27.6	27.5	27.8	28	28.2	28.6	28.8	28.6	30.7	30.6
2018-05-05 10:27:00	27.9	27.6	27.8	27.9	28.1	28.5	28.8	28.7	31.9	31.8
2018-05-05 11:27:00	28.3	27.8	27.9	27.9	28.1	28.5	28.8	28.7	32.9	32.8
2018-05-05 12:27:00	28.6	28	28	27.9	28.1	28.5	28.8	28.8	34.4	34.3
2018-05-05 13:27:00	29	28.3	28.3	28	28.1	28.5	28.8	28.9	34.9	34.8
2018-05-05 14:27:00	29.3	28.7	28.5	28.1	28.1	28.5	28.8	28.9	36	35.9
2018-05-05 15:28:00	29.7		28.9	28.3	28.2	28.6	28.9	29	34.1	34.1
2018-05-05 16:28:00	30	29.4	29.2	28.5	28.3	28.6	28.9	29.1	33.3	33.4
2018-05-05 17:28:00	30.3	29.7	29.5	28.8	28.4	28.6	28.9	29.1	32.8	32.8
2018-05-05 18:28:00	30.4	29.9	29.9	29.1	28.6	28.7	28.9	29.2	31.6	31.6
2018-05-05 19:28:00	30.4	30.2	30.1	29.3	28.8	28.8	29	29.2	30.4	30.4
2018-05-05 20:28:00	30.4	30.3	30.3	29.4	28.9	28.9	29.1	29.2	29.5	29.5
2018-05-05 21:28:00	30.3	30.4	30.3	29.6	29.1	28.9	29.1	29.2	29.1	29.1
2018-05-05 22:28:00	29.7	30.3	30.3	29.8	29.2	29.1	29.1	29.1	23.6	23.2
2018-05-05 23:29:00	29.3	29.6	30.3	29.8	29.3	29.1	29.2	29.1	23.8	22.9
2018-11-05 00:45:00	27.6	27.9	28.6	29	29.4	29.9	30.3	30.3	24.1	24.1
2018-11-05 01:45:00	27.4	27.7	28.4	28.8	29.2		30.2	30.2	23.8	23.8
2018-11-05 02:45:00	27.3	27.5	28.2	28.6	29.1		30.1	30.1	23.8	23.8
2018-11-05 03:46:00	27.1	27.3	28	28.4	28.9	29.4	29.9	30	24	24
2018-11-05 04:46:00	26.9	27.1	27.8	28.3	28.7	29.3	29.8	29.9	24.1	24.1
2018-11-05 05:46:00	26.8	26.9	27.6	28.1	28.5	29.1	29.6	29.8	24	24
2018-11-05 06:46:00	26.6	26.8	27.4	27.9	28.3	29	29.5	29.6	24.1	24.1
2018-11-05 07:46:00	26.6	26.7	27.3	27.7	28.1	28.8	29.3	29.5	25.8	25.8
2018-11-05 08:46:00	26.7	26.6	27.1	27.5	28	28.7	29.2	29.4	28.7	28.7
2018-11-05 09:46:00	27.2	26.8	27	27.4	27.9	28.6	29.1	29.3	31.6	31.6
2018-11-05 10:47:00	27.6	26.9	27.1	27.3	27.8	28.4	29	29.3	32.5	32.4
2018-11-05 11:47:00	28.1	27.1	27.2	27.3	27.7	28.4	28.9	29.3	33.4	33.2
2018-11-05 12:47:00	28.4	27.4	27.4	27.3	27.6	28.3	28.9	29.3	35.4	35.1
2018-11-05 13:47:00	28.9	27.8	27.8	27.4	27.6	28.3	28.9	29.3	36.5	36.1
2018-11-05 14:47:00	29.4	28.3	28.1	27.6	27.7	28.3	28.8	29.3	37	36.9
2018-11-05 15:47:00	30	28.8	28.5	27.9	27.8	28.3	28.8	29.3	37.3	37.1
2018-11-05 16:47:00	30.4	29.2	28.9	28.1	27.9	28.3	28.8	29.3	33.4	33.4
2018-11-05 17:47:00	30.4	29.6	29.7	28.6	28.1	28.3	28.8	29.2	28.5	28.4
2018-11-05 18:48:00	29.1	29.8	29.9	28.8	28.3	28.4	28.8	29.1	22.6	21.4
2018-11-05 19:48:00	28.6	29	29.8	29	28.4	28.4	28.7	28.9	22.4	22.5
2018-11-05 20:48:00	28.1	28.5	29.7	29.1	28.5	28.4	28.6	28.8	23.4	23.3
2018-11-05 21:48:00	27.8	28.1	29.4	29.1		28.4	28.6	28.6	23.1	23.1
2018-11-05 22:48:00	27.3	27.7	29	29.1	28.6	28.4	28.5	28.4	23.6	23.6
2018-11-05 23:48:00	26.9	27.3	28.6	28.9	28.6	28.4	28.5	28.4	22.8	22.8
21/5/18 0:28:03	27.1	27.6	27.4	27.4	27.4	27.6	27.8	27.8	26.9	26.9
21/5/18 1:28:11	27.1	27.6	27.4	27.3	27.3	27.6	27.8	27.8	27.4	27.4
21/5/18 2:28:19	27.1	27.6	27.4	27.3	27.3	27.5	27.8	27.8	27.2	27.2
21/5/18 3:28:28	27.1	27.6	27.4	27.3	27.3	27.5	27.8	27.8	26.9	26.9
21/5/18 4:28:36	27.1	27.6	27.4	27.3	27.3	27.4	27.7	27.8	26.7	26.7
21/5/18 5:28:44	27.1	27.5	27.4	27.3	27.2	27.4	27.7	27.7	26.6	26.6
21/5/18 6:28:52	27	27.5	27.3	27.2	27.2	27.4	27.6	27.7	26.8	26.8
21/5/18 7:29:00	27	27.4	27.3	27.2	27.1	27.4	27.6	27.6	27.4	27.5
21/5/18 8:29:08	27.1	27.4	27.3	27.1	27.1	27.4	27.6	27.6	28.4	28.4
21/5/18 9:29:17	27.1	27.4	27.3	27.2	27.1	27.3	27.6	27.6	28.3	28.3
21/5/18 10:29:25	27.2	27.4	27.4	27.2	27.1	27.3	27.6	27.6	28.8	28.7
21/5/18 11:29:33	27.3	27.6	27.5	27.3	27.1	27.3	27.6	27.6	29.9	29.9
21/5/18 12:29:41	27.5	28	27.8	27.4	27.2	27.4	27.6	27.6	31.8	31.6
21/5/18 13:29:49	28.1	28	28.1	27.7	27.4	27.4	27.6	27.6	32.8	32.6
21/5/18 14:29:58	28.5	28.1	28.4	27.8	27.6	27.6	27.7	27.7	34.3	34.1
21/5/18 15:30:06	29.2	28.1	28.7	28.1	27.7	27.7	27.8	27.8	33.5	33.4
21/5/18 16:30:14	28.8	28.3	29	28.3	27.9	27.9	27.9	27.9	30.9	30.7
21/5/18 17:30:23	28.8	28.4	29.1	28.6	28.1	28	28.1	28	30.1	30.2
21/5/18 18:30:31	28.8	28.6	29.3	28.8	28.3	28.2	28.3	28.1	29.8	29.8
21/5/18 19:30:39	28.8	28.8	29.3	28.9	28.5	28.4	28.4	28.2	28.8	28.8
21/5/18 20:30:47	28.8	28.9	29.3	29	28.6	28.5	28.5	28.3	28.1	28.1
21/5/18 21:30:56	28.7	28.9	29.2	29	28.8	28.6	28.7	28.4	27.6	27.7
21/5/18 22:31:04	28.6	28.9	29.1	29	28.8	28.8	28.8	28.6	27.4	27.4
21/5/18 23:31:12	28.6	28.9	29	28.9	28.8	28.8	28.9	28.6	27.6	27.7
26/5/18 0:44:29	30.3	30.8		30.9	31	31.1	31.1	30.8	26.9	27
26/5/18 1:44:37	30.1	30.7		30.7	30.9	31.1	31.2	30.9	27.8	27.8
26/5/18 2:44:45	29.9	30.6		30.4	30.8	31	31.2	30.9	27.7	27.7
26/5/18 3:44:54	29.8	30.5	30.1	30.3	30.6	30.9	31.2	31	27.9	27.9
26/5/18 4:45:02	29.6	30.4	30	30.1	30.4	30.8	31.1	31	27.9	28
26/5/18 5:45:10	29.5	30.3	29.9	29.9	30.2	30.7	31	31	27.6	27.6
26/5/18 6:45:18	29.3	30.3	29.8	29.8	30.1	30.5	30.9	30.9	27.9	27.9
26/5/18 7:45:26	29.3	30.1	29.7	29.7	29.9	30.4	30.8	30.9	29.6	29.6
26/5/18 8:45:35	29.4		29.6	29.6	29.8	30.3	30.7	30.8	30.4	30.4
26/5/18 9:45:43	29.8	30	29.7	29.6	29.7	30.1	30.6	30.8	32.3	32.1
26/5/18 10:45:51	30.1	30	29.9	29.6	29.7	30.1	30.5	30.7	34.2	34
26/5/18 11:45:59	30.5	30	30.2	29.8	29.7	30	30.4	30.7	35.8	35.5
26/5/18 12:46:08	30.9	30.1	30.8	30.1	29.8	30	30.4	30.6	36.4	36.1
26/5/18 13:46:16	31.3	30.3	31.1	30.4	29.9	30.1	30.4	30.6	36.8	36.5
26/5/18 14:46:25	31.6	30.5	31.8		30.3	30.3	30.4	30.6	37.4	37.1
26/5/18 15:46:33	32	30.7	32.1	31.3	30.7	30.5	30.6	30.6	36	35.8
26/5/18 16:46:41	32.3	30.9	32.3	31.6	31	30.8	30.7	30.7	35.9	35.9
26/5/18 17:46:50	32.4	31.2	32.5	31.9	31.3	31	30.9	30.8	34.3	34.3
26/5/18 18:46:58	32.4	31.4	32.7	32.1	31.5	31.3	31.1	30.9	33.1	33.1
26/5/18 19:47:06	32.3	31.6	32.8	32.3	31.8	31.4	31.4	31.1	31.4	31.4
26/5/18 20:47:15	32.2	31.8	32.7	32.3	31.9	31.6	31.6	31.3	30.5	30.6
26/5/18 21:47:23	32	31.9	32.6	32.4	32	31.8	31.7	31.4	29.9	29.9
26/5/18 22:47:31	31.8	32	32.4	32.3	32.1	31.9	31.9	31.6	29.1	29.1
26/5/18 23:47:40	31.6	32	32.2	32.2	32.1	32.1	32	31.7	28.8	28.8
2018-02-06 00:50:00	27.13	28.19	27.81	28.06	28.31	28.75	29	28.88	25.69	25.75
2018-02-06 01:50:00	27.06	28.13	27.69	27.94	28.19	28.63	28.88	28.81	25.81	25.81
2018-02-06 02:50:00	27	28	27.63	27.75	28.06	28.5	28.88	28.81	25.63	25.56
2018-02-06 03:50:00	26.94	27.88	27.5	27.69	27.94	28.44	28.75	28.75	25.5	25.5
2018-02-06 04:50:00	26.88	27.81	27.38	27.56	27.81	28.31	28.69	28.75	25.63	25.63
2018-02-06 05:51:00	26.75	27.69	27.31	27.44	27.69	28.19	28.63	28.69	25.44	25.44
2018-02-06 06:51:00	26.75	27.63	27.21	27.31	27.63	28.13	28.5	28.63	25.69	25.69
2018-02-06 07:51:00	26.69	27.56	27.13	27.25	27.5	28	28.44	28.5	26.69	26.63
2018-02-06 08:51:00	26.81	27.44	27.06	27.19	27.38	27.88	28.31	28.44	28	27.88
2018-02-06 09:51:00	27	27.44	27.13	27.13	27.31	27.81	28.25	28.44	29.94	29.88
2018-02-06 10:51:00	27.5	27.38	27.25	27.13	27.31	27.81	28.19	28.38	32.75	32.44
2018-02-06 11:51:00	27.88	27.44	27.56	27.19	27.25	27.75	28.19	28.44	34.63	34
2018-02-06 12:51:00	28.31	27.56	27.88	27.38	27.31	27.75	28.19	28.44	36	35.25
2018-02-06 13:52:00	28.81	27.75	27.98	27.56	27.44	27.81	28.19	28.44	37	36.25
2018-02-06 14:52:00	29.38	28	29.25	27.88	27.56	27.81	28.19	28.5	37.25	36.63
2018-02-06 15:52:00	29.94	28.25	30	28.56	27.88	27.94	28.25	28.56	36.06	35.63
2018-02-06 16:52:00	30.38	28.63	30.13	28.94	28.13	28.06	28.31	28.63	34.19	33.88
2018-02-06 17:52:00	30.44	29	30.25	29.25	28.44	28.25	28.44	28.63	32.19	32.13
2018-02-06 18:52:00	30.44	29.31	30.56	29.56	28.75	28.44	28.5	28.69	31.63	31.56
2018-02-06 19:52:00	30.38	29.56	30.63	29.75	29	28.69	28.63	28.69	30.31	30.25
2018-02-06 20:53:00	30.25	29.75	30.69	29.94	29.19	28.88	28.75	28.69	29.44	29.44
2018-02-06 21:53:00	30.13	29.94	30.63	30.06	29.38	29	28.88	28.75	29	29.06
2018-02-06 22:53:00	29.94	30	30.5	30.13	29.5	29.19	29	28.81	28.69	28.69
2018-02-06 23:53:00	29.75	30.06	30.38	30.13	29.63	29.31	29.13	28.88	28.25	28.31
23/7/18 0:08:38	27.75	28.44	28.31	28.25	28.38	28.63	28.81	28.69	28.06	28.06
23/7/18 1:08:47	27.75	28.38	28.28	28.19	28.25	28.56	28.75	28.75	28	28
23/7/18 2:08:55	27.75	28.31	28.25	28.13	28.19	28.5	28.75	28.75	27.94	28
23/7/18 3:09:03	27.69	28.31	28.19	28.13	28.13	28.44	28.69	28.75	27.69	27.75
23/7/18 4:09:11	27.63	28.25	28.13	28.06	28.13	28.38	28.69	28.69	27.19	27.19
23/7/18 5:09:19	27.63	28.19	28.06	28	28.06	28.31	28.63	28.69	27.25	27.25
23/7/18 6:09:28	27.56	28.13	28	27.94	28	28.31	28.56	28.63	27.31	27.31
23/7/18 7:09:36	27.56	28.13	28	27.94	27.94	28.25	28.5	28.56	27.69	27.69
23/7/18 8:09:44	27.56	28.06	27.94	27.88	27.88	28.19	28.44	28.56	28.56	28.5
23/7/18 9:09:52	27.81	28.06	28	27.88	27.88	28.13	28.44	28.5	29.06	29
23/7/18 10:10:01	28	28.06	28.06	27.88	27.81	28.13	28.38	28.5	29.94	29.94
23/7/18 11:10:09	28.25	28.13	28.19	27.94	27.88	28.13	28.38	28.5	25.5	25.13
23/7/18 12:10:17	27.94	28.25	28.31	28	27.94	28.13	28.38	28.5	27	26.94
23/7/18 13:10:25	27.81	28.25	28.25	28.06	27.94	28.13	28.38	28.44	26.75	26.81
23/7/18 14:10:34	27.63	28.25	28.19	28.06	28	28.13	28.31	28.38	26	26
23/7/18 15:10:42	27.38	28.19	28	28	28	28.13	28.31	28.31	24.56	24.5
23/7/18 16:10:50	27.13	28.06	27.81	27.94	27.94	28.13	28.31	28.31	25.19	25.19
23/7/18 17:10:58	27.06	27.94	27.69	27.75	27.88	28.06	28.25	28.25	26.19	26.19
23/7/18 18:11:06	27	27.81	27.56	27.63	27.75	28.06	28.25	28.25	26.5	26.44
23/7/18 19:11:15	26.94	27.69	27.44	27.5	27.63	27.94	28.19	28.19	26.19	26.19
23/7/18 20:11:23	26.94	27.63	27.38	27.38	27.5	27.88	28.19	28.19	26.31	26.31
23/7/18 21:11:31	26.88	27.5	27.31	27.31	27.44	27.81	28.13	28.19	25.94	25.94
23/7/18 22:11:39	26.81	27.44	27.25	27.25	27.31	27.69	28	28.13	26.25	26.25
23/7/18 23:11:47	26.75	27.38	27.19	27.13	27.25	27.63	27.94	28.06	26.63	26.63
28/7/18 0:25:06	27.56	28.25	28.19	28.13	28	28	28.06	27.88	25.31	25.31
28/7/18 1:25:14	27.31	28.19	28	28.06	28	28	28.13	27.94	25.31	25.31
28/7/18 2:25:23	27.13	28.06	27.81	27.88	27.94	28.06	28.19	28	25.38	25.38
28/7/18 3:25:31	27	27.94	27.7	27.75	27.88	28.06	28.19	28	25.31	25.31
28/7/18 4:25:39	26.81	27.88	27.5	27.56	27.75	28	28.19	28.06	25.5	25.5
28/7/18 5:25:47	26.69	27.75	27.38	27.44	27.63	27.94	28.19	28.06	25.31	25.19
28/7/18 6:25:55	26.5	27.63	27.25	27.31	27.5	27.88	28.13	28.06	25.5	25.44
28/7/18 7:26:04	26.38	27.5	27.13	27.19	27.38	27.75	28.06	28.06	25.63	25.63
28/7/18 8:26:12	26.31	27.38	27	27.06	27.25	27.63	28	28	26	26
28/7/18 9:26:20	26.31	27.31	26.94	26.94	27.13	27.56	27.94	28	26.69	26.63
28/7/18 10:26:28	26.31	27.19	26.88	26.88	27	27.44	27.81	27.94	27.56	27.5
28/7/18 12:05:19	27.31	27.13	27	26.88	26.94	27.31	27.75	27.88	28.75	28.69
28/7/18 13:05:27	28.13	27.13	27.13	26.88	26.88	27.25	27.63	27.81	29.63	29.5
28/7/18 14:05:36	28.19	27.25	27.38	27	26.94	27.25	27.63	27.81	29.38	29.31
28/7/18 15:05:44	28.38	27.31	27.56	27.13	27	27.25	27.56	27.75	29.69	29.63
28/7/18 16:05:52	28.69	27.44	27.81	27.31	27.06	27.25	27.56	27.75	30.5	30.31
28/7/18 17:06:01	28.63	27.56	28	27.44	27.19	27.31	27.56	27.69	30.44	30.31
28/7/18 18:06:09	28.31	27.75	28.13	27.63	27.38	27.44	27.63	27.69	29.5	29.44
28/7/18 19:06:17	27.81	27.88	28.25	27.81	27.5	27.5	27.69	27.69	28.31	28.31
28/7/18 20:06:25	27.81	27.94	28.25	27.94	27.69	27.69	27.81	27.69	27.75	27.81
28/7/18 21:06:34	27.81	28	28.25	28	27.75	27.75	27.88	27.75	27.56	27.63
28/7/18 22:06:42	27.75	28.06	28.19	28	27.81	27.81	27.94	27.81	27.56	27.56
28/7/18 23:06:50	27.75	28.06	28.13	28	27.88	27.88	28	27.88	27.63	27.63
2018-04-08 00:26:00	27.56	28.19	28	27.94	27.94	28.13	28.31	28.19	26.25	26.31
2018-04-08 01:26:00	27.5	28.13	27.88	27.88	27.88	28.13	28.31	28.25	26.13	26.13
2018-04-08 02:27:00	27.44	28.06	27.75	27.75	27.81	28.06	28.31	28.25	26.31	26.31
2018-04-08 03:27:00	27.38	28	27.69	27.69	27.75	28	28.25	28.25	26.44	26.5
2018-04-08 04:27:00	27.31	27.94	27.63	27.63	27.69	27.94	28.19	28.19	26.25	26.25
2018-04-08 05:27:00	27.25	27.88	27.56	27.56	27.56	27.88	28.19	28.19	26.13	26.13
2018-04-08 06:27:00	27.19	27.81	27.5	27.5	27.5	27.81	28.13	28.13	26.19	26.25
2018-04-08 07:27:00	27.13	27.75	27.44	27.38	27.44	27.75	28.06	28.06	26.69	26.69
2018-04-08 08:27:00	27.13	27.69	27.44	27.38	27.38	27.69	28	28.06	27.38	27.38
2018-04-08 09:28:00	27.38	27.63	27.5	27.31	27.38	27.63	27.94	28	29.44	29.25
2018-04-08 10:28:00	27.81	27.63	27.63	27.38	27.31	27.63	27.88	28	30.88	30.69
2018-04-08 11:28:00	28.63	27.69	27.88	27.5	27.38	27.63	27.88	28	32.81	32.38
2018-04-08 12:28:00	28.56	27.81	28.25	27.69	27.5	27.69	27.88	28	30.88	30.75
2018-04-08 13:28:00	28.94	27.94	28.69	28	27.63	27.75	27.94	28.06	34.13	33.81
2018-04-08 14:28:00	29.13	28.13	29.13	28.25	27.88	27.88	28.06	28.13	34.94	34.38
2018-04-08 15:28:00	29.31	28.38	29.5	28.63	28.13	28.06	28.19	28.19	34.19	33.81
2018-04-08 16:29:00	29.69	28.63	29.81	29	28.44	28.25	28.38	28.25	33.06	32.94
2018-04-08 17:29:00	29.81	28.88	30.06	29.31	28.69	28.5	28.56	28.38	31.63	31.63
2018-04-08 18:29:00	29.88	29.13	30.25	29.69	29.13	28.81	28.81	28.5	31.25	31.25
2018-04-08 19:29:00	29.94	29.38	30.31	29.81	29.31	29.06	29	28.69	30.5	30.5
2018-04-08 20:29:00	29.88	29.5	30.31	29.94	29.5	29.25	29.25	28.88	30.06	30.06
2018-04-08 21:29:00	29.81	29.63	30.21	29.94	29.63	29.44	29.38	29.06	29.19	29.19
2018-04-08 22:29:00	29.75	29.69	30.15	29.94	29.69	29.56	29.56	29.25	28.56	28.63
2018-04-08 23:29:00	29.69	29.75	30	29.94	29.75	29.69	29.69	29.38	28.25	28.31
2018-11-08 00:50:00	30.25	30.63	30.63	30.63	30.56	30.63	30.63	30.31	28.13	28.06
2018-11-08 01:50:00	30.06	30.63	30.5	30.5	30.56	30.69	30.69	30.44	27.94	27.94
2018-11-08 02:50:00	29.88	30.56	30.31	30.38	30.44	30.63	30.75	30.5	27.63	27.63
2018-11-08 03:50:00	29.69	30.44	30.19	30.19	30.38	30.63	30.75	30.56	27.56	27.56
2018-11-08 04:50:00	29.5	30.38	30	30.06	30.25	30.56	30.75	30.63	27.25	27.25
2018-11-08 05:50:00	29.31	30.25	29.81	29.88	30.06	30.44	30.69	30.63	27.06	27.06
2018-11-08 06:50:00	29.19	30.19	29.69	29.75	29.94	30.38	30.63	30.56	27.63	27.63
2018-11-08 07:51:00	29.06	30.06	29.56	29.56	29.81	30.25	30.56	30.56	28.06	28
2018-11-08 08:51:00	29.25	29.94	29.5	29.5	29.69	30.13	30.44	30.5	30.81	30.44
2018-11-08 09:51:00	29.63	29.88	29.56	29.44	29.56	30	30.38	30.5	32	31.56
2018-11-08 10:51:00	30	29.88	29.69	29.5	29.5	29.94	30.31	30.44	31.75	31.5
2018-11-08 11:51:00	30.25	29.94	29.81	29.63	29.56	29.88	30.25	30.44	32.69	32.38
2018-11-08 12:51:00	30.5	30	30.06	29.88	29.63	29.88	30.19	30.38	32.13	32
2018-11-08 13:51:00	30.69	30.13	30.19	29.94	29.69	29.94	30.25	30.44	33.06	32.81
2018-11-08 14:51:00	30.88	30.25	30.25	30	29.81	29.94	30.25	30.44	34.25	33.88
2018-11-08 15:52:00	31.06	30.31	30.31	30.06	29.88	30	30.31	30.5	34.94	34.56
2018-11-08 16:52:00	31.25	30.44	30.38	30.06	29.94	30.06	30.38	30.56	32.81	32.63
2018-11-08 17:52:00	31.31	30.5	30.44	30.13	29.94	30.13	30.44	30.63	31.5	31.38
2018-11-08 18:52:00	31.25	30.63	30.44	30.19	30	30.19	30.44	30.63	30.38	30.38
2018-11-08 19:52:00	31.13	30.75	30.5	30.19	30	30.19	30.5	30.63	29.75	29.75
2018-11-08 20:52:00	31	30.81	30.5	30.19	30.06	30.25	30.5	30.63	29.25	29.25
2018-11-08 21:52:00	30.88	30.81	30.5	30.25	30.06	30.25	30.5	30.56	29.13	29.13
2018-11-08 22:53:00	30.75	30.88	30.69	30.38	30.19	30.31	30.5	30.5	28.75	28.69
2018-11-08 23:53:00	30.56	30.81	30.63	30.44	30.25	30.31	30.5	30.44	28.44	28.44
23/8/18 0:29:43	30.56	30.88	30.81	30.69	30.69	30.75	30.81	30.5	28.38	28.38
23/8/18 1:29:52	30.44	30.81	30.75	30.63	30.63	30.75	30.88	30.63	27	27.06
23/8/18 2:30:00	30.19	30.75	30.63	30.44	30.56	30.75	30.88	30.69	26.56	26.56
23/8/18 3:30:08	30.06	30.63	30.5	30.25	30.44	30.69	30.88	30.69	26.81	26.81
23/8/18 4:30:16	29.88	30.5	30.38	30.06	30.31	30.63	30.81	30.69	27	27
23/8/18 5:30:24	29.56	30.44	30.25	29.94	30.19	30.56	30.81	30.75	26.56	26.63
23/8/18 6:30:33	29.38	30.25	30.13	29.75	30	30.44	30.69	30.69	26.75	26.81
23/8/18 7:30:41	29.25	30.13	30	29.63	29.88	30.25	30.63	30.63	27.06	27.13
23/8/18 8:30:49	29.13	30	29.88	29.5	29.69	30.13	30.5	30.56	27.81	27.88
23/8/18 9:30:57	29.13	29.94	29.75	29.38	29.56	30	30.38	30.5	28.81	28.75
23/8/18 10:31:06	29.13	29.81	29.69	29.31	29.5	29.88	30.31	30.44	29.63	29.56
23/8/18 11:31:14	29.25	29.81	29.69	29.38	29.44	29.81	30.19	30.38	33.88	33.56
23/8/18 12:31:22	29.63	29.81	29.69	29.5	29.44	29.75	30.13	30.38	34.75	34.25
23/8/18 13:31:31	30	29.88	29.81	29.81	29.56	29.75	30.06	30.31	32.69	32.5
23/8/18 14:31:39	30.38	30.06	30.06	30.06	29.81	29.88	30.06	30.25	33.06	32.94
23/8/18 15:31:47	30.69	30.25	30.31	30.25	30	30	30.13	30.25	35.63	35.38
23/8/18 16:31:56	31.06	30.44	30.63	30.5	30.19	30.13	30.25	30.31	33.56	33.5
23/8/18 17:32:04	31.31	30.63	30.88	30.75	30.44	30.31	30.44	30.38	32.56	32.56
23/8/18 18:32:13	31.31	30.81	31.13	31	30.63	30.5	30.56	30.44	30.81	30.88
23/8/18 19:32:21	31.25	31	31.25	31.19	30.81	30.69	30.75	30.56	30.06	30.13
23/8/18 20:32:29	31.19	31.06	31.31	31.25	30.94	30.81	30.88	30.63	29.63	29.69
23/8/18 21:32:38	31.06	31.13	31.31	31.25	31	30.94	31	30.75	29.56	29.56
23/8/18 22:32:46	30.94	31.19	31.25	31.19	31.06	31.06	31.13	30.81	29	29.06
23/8/18 23:32:54	30.81	31.13	31.19	31.06	31.06	31.06	31.19	30.94	28.63	28.63
