# Supplementary material for: A simplistic approach of algal biofuels production from wastewater using a Hybrid Anaerobic Baffled Reactor and Photobioreactor (HABR-PBR) System
Source: PLoS One. 2019 Dec 5;14(12):e0225458. doi: 10.1371/journal.pone.0225458 (PMC6894839; doi:10.1371/journal.pone.0225458)
Supplement: S3 File — (XLSX) [file pone.0225458.s006.xlsx]

## Sheet: NH4-N
Ammonia-N data of both HABR (U) and HABR (I).
Day	U-R	U-E	I-R	I-E
7	95.2	52.64	87.36	96.32
15	53.76	66.08	41.44	68.32
18	63.84	22.4	76.16	26.88
29	63.84	48.16	62.72	48.16
35	45.92	41.44	50.4	58.24
45	24.64	26.88	24.64	25.76
108	52.6	3.6	60.4	4.6
113	55	53	58	55.5
120	23.2	2.8	16.2	1.4
139	66.3	60.9	66.3	64.2

## Sheet: NO3-N
Nitrate-N data of both HABR (U) and HABR (I).
Day	U-R	U-E	I-R	I-E
7	11.4	1.6	1.6	2.2
15	41.6	10.1	60.3	7.7
18	7.9	126	10.2	96.8
29	6	30	36	4
35	178	26	159	19
45	5	7	15	0
50	19.8	2.1	14.2	1.1
108	10	8	18	11
113	3	13	6	8
120	14	11	0	3
127	41	14	26	18
139	36	48	36	8

## Sheet: PO43-
Orthophosphate (PO43-) data of both HABR (U) and HABR (I).
Day	U-R	U-E	I-R	I-E
9	24.4	19.4	28.4	21.5
18	19.8	17.4	22.8	19.2
27	42.9	74.6	54.2	51.4
35	23.4	18.4	2.8	20.8
45	21	12.6	19	98.6
50	24.4	17.8	20.4	15.6
108	38.2	33.2	39.8	28.6
113	31.8	25.4	43	17.4
120	49	15.4	60.8	16.8
127	29.6	7.6	35.2	11.4
139	58	37.6	79.6	40.2
