# Supplementary material for: A simplistic approach of algal biofuels production from wastewater using a Hybrid Anaerobic Baffled Reactor and Photobioreactor (HABR-PBR) System
Source: PLoS One. 2019 Dec 5;14(12):e0225458. doi: 10.1371/journal.pone.0225458 (PMC6894839; doi:10.1371/journal.pone.0225458)
Supplement: S4 File — (XLSX) [file pone.0225458.s007.xlsx]

## Sheet: FTIR
FTIR data for microalgae dry cells and biodiesel samples
Wavelenght (cm-1)	Microalgae Dry Cell 1	Microalgae Dry Cell 2	Biodiesel (Veg. Oil)	Biodiesel 1	Biodiesel 2
499.563	0.0231638	0.00165386	0.018955	0.007552	0.00036
501.492	0.0283297	0.00697587	0.022429	0.006985	0.001229
503.421	0.0207003	0.00541771	0.022315	0.001464	-0.00086
505.349	0.0171523	0.00451821	0.016394	-0.00028	-0.00458
507.278	0.017074	0.00524227	0.015115	-0.00201	-0.00556
509.207	0.0138357	0.00391137	0.012558	-0.0037	-0.00552
511.136	0.0113722	0.00482283	0.012296	-0.00541	-0.00109
513.065	0.0117863	0.00808828	0.014265	-0.00519	0.000598
514.994	0.0156261	0.0103338	0.018641	2.25e-05	0.004073
516.922	0.0206053	0.0120563	0.020019	0.002376	0.006173
518.851	0.0177979	0.0110954	0.01802	-0.00181	0.005171
520.78	0.0124206	0.0088259	0.016616	-0.00634	0.002138
522.709	0.0110544	0.00880915	0.016498	-0.00531	0.001586
524.638	0.0119556	0.0101042	0.016073	-0.00177	0.003355
526.566	0.0125785	0.00978042	0.015311	-0.00314	0.004401
528.495	0.0116271	0.00747985	0.015466	-0.00521	0.002921
530.424	0.00952085	0.0062861	0.016065	-0.00558	0.002367
532.353	0.00887052	0.00586985	0.016135	-0.00807	0.000715
534.282	0.0111614	0.00698465	0.018586	-0.00814	0.001583
536.211	0.0121951	0.00940962	0.019602	-0.00635	0.002261
538.139	0.00976172	0.00893275	0.017562	-0.00823	0.002209
540.068	0.00782008	0.00813214	0.016198	-0.00859	0.002247
541.997	0.00795322	0.00731159	0.017809	-0.00806	0.001425
543.926	0.00920572	0.00725657	0.018271	-0.00685	0.001704
545.855	0.0109667	0.00720394	0.01846	-0.00614	0.002523
547.783	0.0109246	0.00614735	0.016793	-0.00618	0.001818
549.712	0.00930809	0.00497434	0.015367	-0.00807	0.000696
551.641	0.00818338	0.00595995	0.01591	-0.00819	0.000876
553.57	0.00788364	0.0072167	0.017263	-0.0075	0.002244
555.499	0.00815796	0.00799738	0.018475	-0.00706	0.002782
557.427	0.0082717	0.00794873	0.019609	-0.00748	0.00184
559.356	0.00700917	0.00618164	0.019953	-0.0082	0.000306
561.285	0.00745276	0.00673585	0.020703	-0.0078	0.001996
563.214	0.00776856	0.00609392	0.020655	-0.00778	0.001993
565.143	0.00791308	0.0066593	0.020892	-0.00869	0.001341
567.072	0.00829579	0.00784188	0.021986	-0.00852	0.001889
569	0.00956233	0.00833788	0.024048	-0.0075	0.003028
570.929	0.00920438	0.00746071	0.024879	-0.00679	0.003394
572.858	0.00829646	0.00647509	0.024048	-0.00723	0.004032
574.787	0.00971354	0.00723823	0.024724	-0.00672	0.004439
576.716	0.00943989	0.00817361	0.026328	-0.0065	0.003568
578.644	0.00723732	0.00718799	0.026694	-0.0075	0.001687
580.573	0.00631066	0.00682357	0.02655	-0.00822	0.001523
582.502	0.00595873	0.00695275	0.02635	-0.00884	0.001723
584.431	0.00758524	0.00804363	0.027481	-0.00721	0.00418
586.36	0.00771303	0.00846945	0.027692	-0.00704	0.004649
588.288	0.00779532	0.00832591	0.027415	-0.00779	0.003546
590.217	0.00894545	0.00838253	0.027067	-0.00713	0.003994
592.146	0.0085139	0.00847902	0.026476	-0.00665	0.004483
594.075	0.00702924	0.00713935	0.025533	-0.00825	0.003421
596.004	0.00634144	0.00594321	0.02523	-0.00915	0.003546
597.933	0.00686532	0.00625341	0.025315	-0.00827	0.003405
599.861	0.00753305	0.00731159	0.025896	-0.00734	0.003563
601.79	0.00623572	0.00638658	0.024927	-0.00901	0.002351
603.719	0.00597412	0.00590653	0.024406	-0.00969	0.002231
605.648	0.00707407	0.00666408	0.024783	-0.00898	0.003088
607.577	0.00702723	0.00667604	0.024299	-0.00846	0.003374
609.505	0.0058858	0.00594161	0.02278	-0.00904	0.002564
611.434	0.00624041	0.00621912	0.022651	-0.00925	0.003233
613.363	0.00716038	0.0066569	0.023342	-0.00856	0.004109
615.292	0.00791642	0.00764731	0.023856	-0.00682	0.005496
617.221	0.00852595	0.008672	0.023135	-0.00597	0.005935
619.149	0.00762872	0.00752211	0.020932	-0.00615	0.005062
621.078	0.0083734	0.00693441	0.020289	-0.00755	0.00356
623.007	0.00937366	0.00583795	0.020208	-0.00936	0.002818
624.936	0.00916089	0.00567448	0.019886	-0.00835	0.003626
626.865	0.00802816	0.00571275	0.019849	-0.0079	0.003634
628.793	0.00743403	0.00677492	0.020286	-0.00782	0.003383
630.722	0.007891	0.00777091	0.020703	-0.00779	0.003759
632.651	0.00801076	0.007928	0.02067	-0.00718	0.004447
634.58	0.00823557	0.00786022	0.020733	-0.00659	0.004805
636.509	0.00749692	0.00766325	0.020858	-0.00656	0.004745
638.438	0.00752569	0.00822065	0.021727	-0.00625	0.005133
640.366	0.00836403	0.00906513	0.022651	-0.00543	0.005712
642.295	0.0086999	0.00921504	0.022943	-0.00523	0.006077
644.224	0.00924252	0.00973018	0.023445	-0.00475	0.006675
646.153	0.00994504	0.0103099	0.024635	-0.00377	0.007803
648.082	0.0102053	0.0108011	0.025253	-0.00301	0.008952
650.01	0.0103866	0.0111217	0.02604	-0.00298	0.008829
651.939	0.0104569	0.0114391	0.027245	-0.00292	0.009048
653.868	0.0105144	0.0114167	0.028338	-0.00292	0.009485
655.797	0.0102562	0.0112828	0.028763	-0.00255	0.009384
657.726	0.00991761	0.0110539	0.029702	-0.00258	0.00881
659.654	0.00927932	0.0104893	0.030726	-0.00282	0.007879
661.583	0.00872131	0.00961934	0.031683	-0.00321	0.007467
663.512	0.0080121	0.0087031	0.032441	-0.00379	0.007025
665.441	0.00825364	0.00911457	0.033878	-0.00235	0.007543
667.37	0.016985	0.0187211	0.042035	0.010766	0.020722
669.299	0.0216163	0.0229587	0.047663	0.015291	0.027389
671.227	0.0131653	0.0138082	0.042696	0.002734	0.014986
673.156	0.0106128	0.0111966	0.042515	-0.00115	0.011134
675.085	0.0107653	0.011333	0.044614	-0.00104	0.011543
677.014	0.0113401	0.0117198	0.047113	-0.0004	0.012362
678.943	0.0115675	0.012325	0.049936	4.5e-05	0.013077
680.871	0.0113601	0.0125858	0.052183	-0.00025	0.013086
682.8	0.0107794	0.0122596	0.053839	-0.00097	0.012845
684.729	0.0103331	0.0117836	0.056115	-0.00091	0.012103
686.658	0.010034	0.0111655	0.057734	-0.00126	0.011191
688.587	0.00980989	0.0105755	0.0595	-0.00174	0.011308
690.516	0.00979316	0.0103562	0.061337	-0.00212	0.011087
692.444	0.0100327	0.0103043	0.06286	-0.00206	0.011065
694.373	0.00986007	0.0102078	0.063477	-0.00222	0.010522
696.302	0.0094874	0.00986255	0.064453	-0.00273	0.009651
698.231	0.00891735	0.00958266	0.065402	-0.00341	0.009378
700.16	0.00848379	0.0089806	0.066123	-0.00425	0.009695
702.088	0.00857613	0.00851969	0.067091	-0.00478	0.009324
704.017	0.00851056	0.00866083	0.069301	-0.005	0.009222
705.946	0.0078435	0.00854441	0.071692	-0.00475	0.0094
707.875	0.00767623	0.00840805	0.074028	-0.00462	0.009198
709.804	0.00779599	0.00854042	0.076419	-0.00467	0.009356
711.732	0.00811313	0.00868157	0.079635	-0.00456	0.009853
713.661	0.00856275	0.008794	0.083012	-0.00406	0.009941
715.59	0.0087909	0.00886338	0.086364	-0.00367	0.009979
717.519	0.0090806	0.00883786	0.089528	-0.0033	0.010798
719.448	0.00992564	0.0102541	0.094088	-0.00163	0.013026
721.377	0.00939239	0.010152	0.096524	-0.00215	0.012794
723.305	0.00838076	0.00854202	0.095507	-0.00382	0.01109
725.234	0.00825966	0.00800934	0.091712	-0.00374	0.01059
727.163	0.00819476	0.00800934	0.08584	-0.00351	0.010257
729.092	0.00774715	0.00782194	0.07969	-0.00357	0.010044
731.021	0.00795189	0.00788334	0.074424	-0.00342	0.009662
732.949	0.00841689	0.00806516	0.069449	-0.00316	0.00919
734.878	0.0078823	0.00767761	0.063617	-0.00324	0.008679
736.807	0.00717911	0.00736183	0.05797	-0.00312	0.007986
738.736	0.00709481	0.00721032	0.053026	-0.0028	0.007126
740.665	0.00699043	0.00713376	0.048262	-0.00199	0.006804
742.593	0.00670006	0.00721749	0.044008	-0.00103	0.00643
744.522	0.00641905	0.00682277	0.040205	0.000497	0.005307
746.451	0.00625178	0.0065971	0.037367	0.003032	0.004835
748.38	0.0066017	0.00692803	0.035098	0.006139	0.005283
750.309	0.00649666	0.00706598	0.032932	0.009976	0.005261
752.238	0.00618086	0.00694796	0.030726	0.014246	0.00489
754.166	0.00598148	0.00657477	0.028989	0.017766	0.004538
756.095	0.00562219	0.0060078	0.027581	0.019581	0.004005
758.024	0.00580551	0.00599983	0.026953	0.020387	0.003893
759.953	0.00618956	0.00639694	0.026369	0.020194	0.004352
761.882	0.00616547	0.00635867	0.025297	0.017985	0.00415
763.811	0.00605909	0.00646632	0.024443	0.014587	0.003929
765.739	0.00619959	0.00672548	0.023737	0.010682	0.004106
767.668	0.00610726	0.00660268	0.022621	0.006748	0.004374
769.597	0.00597144	0.00649662	0.022034	0.003058	0.004761
771.526	0.00600824	0.00659391	0.021701	-6.4e-06	0.00486
773.455	0.00558539	0.00637621	0.020903	-0.0025	0.004507
775.383	0.00560278	0.00632757	0.020178	-0.00388	0.004497
777.312	0.00589115	0.00646871	0.019602	-0.00456	0.004693
779.241	0.00583027	0.00657716	0.018926	-0.00542	0.004281
781.17	0.00570181	0.00635388	0.018194	-0.00629	0.00388
783.099	0.00559342	0.00604448	0.01744	-0.00697	0.003686
785.027	0.00565564	0.00595039	0.016911	-0.00748	0.003904
786.956	0.00582625	0.00605884	0.016394	-0.00773	0.004062
788.885	0.00591658	0.00656679	0.016146	-0.00746	0.00424
790.814	0.00573593	0.00674542	0.016043	-0.00757	0.004688
792.743	0.00574463	0.0066258	0.015884	-0.00765	0.004786
794.672	0.00578343	0.00669837	0.015818	-0.00714	0.004625
796.6	0.00618153	0.00724221	0.016198	-0.00681	0.004262
798.529	0.00620093	0.00659311	0.015851	-0.00712	0.003541
800.458	0.00579079	0.0061322	0.015322	-0.0079	0.003197
802.387	0.00564494	0.0060708	0.015526	-0.00841	0.003107
804.316	0.00531508	0.00579568	0.015522	-0.00879	0.003055
806.244	0.005107	0.00581961	0.015189	-0.0088	0.003183
808.173	0.00503073	0.0059767	0.015215	-0.00869	0.00282
810.102	0.00525085	0.00604448	0.015267	-0.00876	0.002577
812.031	0.00531977	0.00587304	0.015241	-0.00891	0.002457
813.96	0.00518395	0.00559075	0.015393	-0.00896	0.002523
815.889	0.00547834	0.00568644	0.015555	-0.00875	0.002932
817.817	0.00589383	0.00617127	0.015688	-0.00849	0.003331
819.746	0.00539403	0.00626138	0.015773	-0.00885	0.003148
821.675	0.00511303	0.00608116	0.01618	-0.00882	0.002747
823.604	0.00516454	0.00598547	0.016534	-0.00856	0.003104
825.533	0.00559208	0.00621114	0.017019	-0.00869	0.003011
827.461	0.00587041	0.00621912	0.017444	-0.0087	0.002809
829.39	0.00562553	0.00592965	0.017761	-0.00893	0.002897
831.319	0.005293	0.00602933	0.018127	-0.0091	0.002905
833.248	0.0053947	0.00636983	0.018478	-0.00877	0.003033
835.177	0.0056456	0.00641768	0.018778	-0.00863	0.003112
837.105	0.00571786	0.00627095	0.019328	-0.0085	0.00323
839.034	0.00586171	0.00631401	0.020056	-0.00823	0.003298
840.963	0.00594735	0.00639694	0.020711	-0.00826	0.003265
842.892	0.00570047	0.0065971	0.021176	-0.00837	0.003552
844.821	0.0057734	0.0067805	0.02159	-0.00824	0.003342
846.75	0.00602497	0.00677891	0.021723	-0.00812	0.003279
848.678	0.00589651	0.00660826	0.021354	-0.00836	0.003178
850.607	0.00585971	0.00666727	0.021091	-0.00841	0.003284
852.536	0.0058577	0.00663139	0.021121	-0.0084	0.003364
854.465	0.00581421	0.00665611	0.021328	-0.00847	0.003331
856.394	0.00559676	0.00660108	0.021165	-0.00868	0.003129
858.322	0.00512373	0.00624384	0.020762	-0.00902	0.002697
860.251	0.00491699	0.00595039	0.020707	-0.00926	0.002474
862.18	0.00518796	0.00607718	0.021032	-0.00924	0.002591
864.109	0.00544555	0.00649822	0.021631	-0.00905	0.002771
866.038	0.00571719	0.00686025	0.022278	-0.00868	0.002949
867.966	0.00592594	0.00713057	0.022688	-0.00837	0.002815
869.895	0.00600556	0.00736342	0.02254	-0.00854	0.002875
871.824	0.00636753	0.00757713	0.022381	-0.00844	0.003421
873.753	0.00686732	0.00779961	0.022544	-0.00813	0.00391
875.682	0.00670809	0.00778127	0.022466	-0.008	0.003647
877.611	0.0059333	0.00696949	0.021897	-0.00843	0.003156
879.539	0.00566434	0.00629009	0.021295	-0.00853	0.003413
881.468	0.00572389	0.00650938	0.021198	-0.00853	0.00347
883.397	0.00559208	0.00646233	0.021324	-0.00858	0.003658
885.326	0.00589918	0.0065963	0.021609	-0.00801	0.004226
887.255	0.00623037	0.00696949	0.022226	-0.00747	0.004614
889.183	0.00616346	0.00690331	0.022407	-0.00747	0.004404
891.112	0.00607247	0.00723185	0.022266	-0.00761	0.00418
893.041	0.00595137	0.00736103	0.022237	-0.00761	0.003899
894.97	0.00583629	0.00689214	0.022392	-0.00795	0.003566
896.899	0.00594334	0.00678688	0.022769	-0.00824	0.003825
898.827	0.00610191	0.00699421	0.023172	-0.00837	0.004123
900.756	0.00603902	0.00696232	0.023567	-0.00842	0.00385
902.685	0.00597345	0.00685546	0.024	-0.00849	0.003339
904.614	0.00583562	0.00664973	0.024561	-0.00856	0.003246
906.543	0.0059594	0.00684191	0.025393	-0.00821	0.003863
908.471	0.00615142	0.00708193	0.026276	-0.00789	0.004363
910.4	0.00629393	0.00706758	0.027019	-0.00774	0.004521
912.329	0.00640098	0.00718958	0.027677	-0.0076	0.004688
914.258	0.00646588	0.00743041	0.027906	-0.00759	0.004685
916.187	0.00651874	0.0075867	0.027599	-0.00754	0.004595
918.116	0.00653078	0.00757155	0.02682	-0.00735	0.004551
920.044	0.00655554	0.00751892	0.025903	-0.00719	0.004521
921.973	0.00664988	0.0076481	0.025164	-0.00711	0.004557
923.902	0.00670809	0.00773821	0.024628	-0.00702	0.004535
925.831	0.00670742	0.00772545	0.024144	-0.00689	0.004595
927.76	0.00665188	0.0076816	0.023734	-0.007	0.004671
929.688	0.00660906	0.00768638	0.023508	-0.00714	0.00466
931.617	0.00639362	0.00759149	0.023357	-0.00738	0.004316
933.546	0.00644447	0.00754843	0.023538	-0.00753	0.004155
935.475	0.00667597	0.00765927	0.024114	-0.00751	0.004374
937.404	0.0067576	0.00778446	0.024879	-0.00737	0.004521
939.332	0.00680577	0.00793199	0.025563	-0.00716	0.00463
941.261	0.00687736	0.00794714	0.026143	-0.007	0.004587
943.19	0.00687468	0.00784826	0.026701	-0.00704	0.004486
945.119	0.00679239	0.00771269	0.027318	-0.00718	0.004573
947.048	0.00691817	0.00778287	0.028043	-0.00715	0.004791
948.977	0.0071403	0.00805718	0.02883	-0.00697	0.005108
950.905	0.00708812	0.00815846	0.029562	-0.00691	0.005256
952.834	0.00692286	0.00805878	0.030205	-0.00691	0.005234
954.763	0.00702991	0.00809865	0.031033	-0.00676	0.005444
956.692	0.00722394	0.00825415	0.032038	-0.00656	0.005821
958.621	0.00736846	0.0083913	0.033139	-0.00639	0.006178
960.549	0.00733902	0.00844314	0.034399	-0.00617	0.006498
962.478	0.00733367	0.00850773	0.035745	-0.0059	0.006834
964.407	0.00750093	0.00859146	0.036846	-0.00563	0.007251
966.336	0.00761334	0.0085771	0.037312	-0.00554	0.007582
968.265	0.00751699	0.00851809	0.037138	-0.00537	0.007868
970.194	0.00743536	0.00849497	0.036539	-0.0051	0.008076
972.122	0.00747216	0.00843755	0.035685	-0.00498	0.008343
974.051	0.0074909	0.00841602	0.034736	-0.00486	0.008802
975.98	0.00739857	0.008424	0.033889	-0.00477	0.008999
977.909	0.00729553	0.00842719	0.033276	-0.00463	0.009018
979.838	0.00731627	0.00855159	0.03305	-0.00451	0.009217
981.766	0.00739054	0.00867997	0.032991	-0.00447	0.009515
983.695	0.0073069	0.00858986	0.032862	-0.00447	0.009561
985.624	0.00716506	0.00838811	0.032651	-0.00457	0.009389
987.553	0.00716774	0.00843357	0.032526	-0.00456	0.009318
989.482	0.00725873	0.00867678	0.032441	-0.00448	0.009435
991.41	0.00737849	0.00875573	0.03237	-0.00447	0.009493
993.339	0.00741462	0.00867838	0.03223	-0.00446	0.009313
995.268	0.00737916	0.00865924	0.032097	-0.0044	0.009171
997.197	0.0073611	0.00867359	0.032212	-0.0045	0.009228
999.126	0.00734772	0.00860103	0.032389	-0.00451	0.009154
1001.05	0.00722327	0.00853404	0.032322	-0.00444	0.008914
1002.98	0.00715101	0.00851889	0.032407	-0.00441	0.009012
1004.91	0.00708143	0.00843835	0.032633	-0.00438	0.00934
1006.84	0.00708611	0.00843596	0.032917	-0.00424	0.009616
1008.77	0.00702188	0.00832591	0.033065	-0.00427	0.009785
1010.7	0.00682919	0.00806755	0.033272	-0.00451	0.009782
1012.63	0.00649666	0.00774619	0.03369	-0.00469	0.009542
1014.56	0.00595806	0.00728049	0.034082	-0.00494	0.009258
1016.49	0.00564494	0.00699262	0.034762	-0.00507	0.009195
1018.41	0.00573794	0.00710187	0.035756	-0.00484	0.009455
1020.34	0.00600891	0.00731398	0.03672	-0.0045	0.009951
1022.27	0.0063314	0.00767362	0.037799	-0.00402	0.010579
1024.2	0.00680309	0.00803804	0.038808	-0.00347	0.011147
1026.13	0.00712358	0.00820072	0.039418	-0.00317	0.011505
1028.06	0.00730423	0.00828445	0.039706	-0.00306	0.011745
1029.99	0.00750026	0.00855238	0.040002	-0.00266	0.012051
1031.92	0.00778462	0.0089176	0.040312	-0.00213	0.01249
1033.84	0.0079278	0.00909144	0.040401	-0.00201	0.012728
1035.77	0.00769162	0.00887694	0.040312	-0.00229	0.012425
1037.7	0.00752167	0.00884105	0.039954	-0.00239	0.012234
1039.63	0.0075558	0.008857	0.039688	-0.00232	0.012283
1041.56	0.00766552	0.00884265	0.039647	-0.00215	0.01251
1043.49	0.00781673	0.00893754	0.039762	-0.00204	0.012638
1045.42	0.00793783	0.00909862	0.040179	-0.00199	0.012815
1047.35	0.00788364	0.0090723	0.040686	-0.00198	0.013034
1049.28	0.00775919	0.00898538	0.041277	-0.0019	0.01305
1051.2	0.0078348	0.00909782	0.042171	-0.00175	0.013118
1053.13	0.0080489	0.00922621	0.04321	-0.00159	0.013506
1055.06	0.00811715	0.00920707	0.044226	-0.00134	0.013935
1056.99	0.00829311	0.00942875	0.045213	-0.00105	0.014243
1058.92	0.00843161	0.00957149	0.045985	-0.0009	0.014492
1060.85	0.00846506	0.00944869	0.046606	-0.0008	0.014819
1062.78	0.00841756	0.00939367	0.047109	-0.00083	0.014907
1064.7	0.00842157	0.00950531	0.047567	-0.00073	0.014934
1066.63	0.00835199	0.00950371	0.047818	-0.00068	0.014792
1068.56	0.00831118	0.00951647	0.048114	-0.00072	0.014601
1070.49	0.00846841	0.00951248	0.048923	-0.00078	0.014598
1072.42	0.00864571	0.00951169	0.050165	-0.00079	0.014625
1074.35	0.00869924	0.00954039	0.051813	-0.00073	0.014393
1076.28	0.00872131	0.00967277	0.054131	-0.00078	0.014292
1078.21	0.00894545	0.00980195	0.057324	-0.0009	0.01438
1080.14	0.00902909	0.00990641	0.06116	-0.00095	0.014429
1082.07	0.0091823	0.0100236	0.065218	-0.00086	0.014535
1083.99	0.00947736	0.0102565	0.069091	-0.00074	0.014653
1085.92	0.00957572	0.0104096	0.072956	-0.00065	0.014691
1087.85	0.00960783	0.010451	0.0769	-0.00061	0.014781
1089.78	0.00982996	0.0104534	0.080758	-0.0006	0.015027
1091.71	0.0100728	0.0105292	0.08435	-0.00054	0.015226
1093.64	0.0101966	0.0106377	0.087684	-0.00059	0.015223
1095.57	0.0102963	0.0107254	0.090263	-0.00073	0.015002
1097.49	0.0103706	0.0108099	0.091557	-0.0008	0.014778
1099.42	0.0103291	0.0108003	0.091461	-0.00092	0.014568
1101.35	0.0101832	0.0106839	0.089997	-0.00111	0.014284
1103.28	0.010119	0.0106121	0.087248	-0.0013	0.014022
1105.21	0.0100534	0.0105898	0.083744	-0.00152	0.013621
1107.14	0.00994705	0.0105244	0.080218	-0.00171	0.013269
1109.07	0.00986141	0.0104447	0.077517	-0.00179	0.013058
1111	0.00973027	0.0102852	0.076216	-0.00195	0.012875
1112.93	0.00955631	0.010042	0.076508	-0.00225	0.012643
1114.86	0.00965065	0.00998775	0.078408	-0.00226	0.01254
1116.78	0.00977443	0.0100483	0.080721	-0.0022	0.01257
1118.71	0.00980521	0.0101744	0.082159	-0.00209	0.012687
1120.64	0.00985539	0.010341	0.082192	-0.00211	0.012703
1122.57	0.00987345	0.0103593	0.080935	-0.00221	0.012673
1124.5	0.0097945	0.0102637	0.079391	-0.00231	0.012521
1126.43	0.00972626	0.0101879	0.078725	-0.00242	0.012168
1128.36	0.00964463	0.0101496	0.080145	-0.00268	0.011775
1130.29	0.00978045	0.0102421	0.084542	-0.00279	0.011543
1132.21	0.0100916	0.0104582	0.091649	-0.00281	0.011491
1134.14	0.0105572	0.0107389	0.100231	-0.00276	0.01174
1136.07	0.0110129	0.0109813	0.108982	-0.00268	0.012067
1138	0.0113414	0.0113529	0.116695	-0.00251	0.012286
1139.93	0.0116692	0.0116185	0.122722	-0.00217	0.012774
1141.86	0.0119375	0.0117931	0.126599	-0.00188	0.013452
1143.79	0.0121021	0.0119095	0.129127	-0.00166	0.01397
1145.72	0.0122466	0.0119614	0.13133	-0.0014	0.014429
1147.64	0.0123851	0.0120778	0.134016	-0.00109	0.014997
1149.57	0.0125624	0.012215	0.137742	-0.0007	0.015873
1151.5	0.0128241	0.0123425	0.142069	-0.00025	0.016801
1153.43	0.0130462	0.0125913	0.146319	0.000172	0.017549
1155.36	0.013366	0.0128417	0.150307	0.000616	0.018467
1157.29	0.0136222	0.0130291	0.153485	0.001148	0.019564
1159.22	0.0138196	0.0131328	0.155281	0.001587	0.020624
1161.15	0.0139829	0.0132373	0.155385	0.002112	0.021691
1163.08	0.0139487	0.0132277	0.154017	0.002662	0.022729
1165	0.0137962	0.0131392	0.151146	0.003085	0.023698
1166.93	0.0137969	0.0131113	0.147332	0.003545	0.024476
1168.86	0.0138062	0.0130865	0.142838	0.004043	0.024962
1170.79	0.0136945	0.0129518	0.137705	0.004204	0.02509
1172.72	0.0135212	0.0127652	0.132272	0.004163	0.02485
1174.65	0.0132543	0.0126169	0.126651	0.004046	0.024187
1176.58	0.0129592	0.0123721	0.120705	0.003609	0.023135
1178.51	0.0126307	0.0120906	0.114803	0.00295	0.021923
1180.43	0.0122333	0.0118202	0.109233	0.002283	0.020861
1182.36	0.0117689	0.0115547	0.104122	0.001728	0.020018
1184.29	0.011524	0.0114343	0.099292	0.001498	0.019635
1186.22	0.0115107	0.0113657	0.094931	0.001632	0.019594
1188.15	0.0113882	0.0112245	0.090899	0.001784	0.019881
1190.08	0.0111333	0.0111033	0.087137	0.001997	0.020501
1192.01	0.0108101	0.0109112	0.083722	0.002369	0.021178
1193.94	0.010574	0.0106935	0.080544	0.002762	0.021757
1195.87	0.0103706	0.010526	0.077402	0.00307	0.022125
1197.79	0.0101157	0.010333	0.074453	0.00309	0.022071
1199.72	0.00990824	0.0100914	0.071936	0.003024	0.021751
1201.65	0.00982126	0.0100196	0.069944	0.003001	0.021358
1203.58	0.0098962	0.0101672	0.068448	0.002882	0.020875
1205.51	0.0100896	0.0102557	0.067291	0.002795	0.020514
1207.44	0.010038	0.0101369	0.066282	0.002675	0.019903
1209.37	0.00986743	0.0100595	0.065473	0.002762	0.01922
1211.3	0.0098962	0.0101959	0.064948	0.003517	0.019048
1213.22	0.00975168	0.0101273	0.064412	0.004249	0.018756
1215.15	0.00940577	0.0099096	0.063769	0.004504	0.018284
1217.08	0.00941982	0.00985219	0.06358	0.004299	0.01824
1219.01	0.00963259	0.00991439	0.063891	0.003773	0.01845
1220.94	0.00979718	0.0100029	0.064623	0.003262	0.018467
1222.87	0.00990891	0.0101536	0.065595	0.002831	0.018366
1224.8	0.00995575	0.0102373	0.066652	0.002431	0.018104
1226.73	0.00989754	0.0102222	0.067734	0.002037	0.017571
1228.65	0.00985338	0.0101496	0.068832	0.001603	0.016919
1230.58	0.00994303	0.0101688	0.069848	0.001297	0.016517
1232.51	0.00994571	0.0102214	0.070698	0.001132	0.016315
1234.44	0.00995976	0.0103059	0.071249	0.001006	0.016283
1236.37	0.0100989	0.010416	0.071707	0.000911	0.016441
1238.3	0.0102642	0.0105061	0.071704	0.000926	0.016698
1240.23	0.0102629	0.0104471	0.070961	0.00096	0.016867
1242.16	0.0101826	0.0104742	0.069693	0.001034	0.017124
1244.09	0.0101063	0.0105029	0.067764	0.001137	0.017372
1246.01	0.00985405	0.0102397	0.065395	0.000955	0.0172
1247.94	0.00957772	0.00999174	0.062997	0.000707	0.016949
1249.87	0.00944859	0.00992635	0.060787	0.00053	0.016807
1251.8	0.00942852	0.00996622	0.059212	0.000434	0.016744
1253.73	0.00946532	0.0100204	0.058122	0.000442	0.016591
1255.66	0.00953423	0.0100444	0.05742	0.000455	0.016479
1257.59	0.00963326	0.0100779	0.057021	0.00053	0.016457
1259.52	0.00986342	0.0102278	0.056825	0.000817	0.016556
1261.44	0.00976975	0.0101664	0.0563	0.000677	0.016294
1263.37	0.00941782	0.00995346	0.055439	0.000178	0.015603
1265.3	0.00938102	0.010101	0.054685	-1.4e-05	0.01515
1267.23	0.00959445	0.0103235	0.053846	-0.00013	0.014888
1269.16	0.00976573	0.0103897	0.052837	-0.00024	0.014666
1271.09	0.00973228	0.0103681	0.051954	-0.00049	0.014243
1273.02	0.00949074	0.0101193	0.051148	-0.00107	0.013462
1274.95	0.00923315	0.00978839	0.050439	-0.00163	0.012788
1276.88	0.00909867	0.00968393	0.049781	-0.00184	0.012387
1278.8	0.00902775	0.00968552	0.048983	-0.00194	0.012114
1280.73	0.00899095	0.00973496	0.047811	-0.0021	0.011873
1282.66	0.00878086	0.00961615	0.046085	-0.00251	0.011412
1284.59	0.00862965	0.00954677	0.044071	-0.00267	0.01103
1286.52	0.00886583	0.00981072	0.042323	-0.0024	0.011166
1288.45	0.00911071	0.00999094	0.040996	-0.00218	0.011284
1290.38	0.00876614	0.0096002	0.039839	-0.00263	0.010713
1292.31	0.00845904	0.00934423	0.039171	-0.00297	0.01026
1294.23	0.00831251	0.0092605	0.038794	-0.00312	0.010118
1296.16	0.00833928	0.00927326	0.03852	-0.003	0.010317
1298.09	0.0083279	0.00921504	0.038343	-0.00304	0.010254
1300.02	0.00834128	0.00919989	0.038217	-0.00319	0.010184
1301.95	0.00837741	0.00923259	0.03794	-0.00328	0.010211
1303.88	0.00843361	0.00931472	0.037452	-0.00326	0.010219
1305.81	0.00853732	0.00940962	0.036938	-0.00316	0.010156
1307.74	0.00864839	0.00960738	0.036524	-0.00298	0.010224
1309.66	0.00853197	0.0095372	0.03621	-0.00313	0.009992
1311.59	0.0089963	0.0100356	0.036535	-0.00257	0.01053
1313.52	0.00952286	0.010518	0.036887	-0.00195	0.011027
1315.45	0.00926527	0.0102748	0.036691	-0.00228	0.010615
1317.38	0.00958709	0.0106975	0.03709	-0.00192	0.010912
1319.31	0.00995508	0.0110507	0.037408	-0.00162	0.011112
1321.24	0.00917896	0.0101863	0.036499	-0.00274	0.009919
1323.17	0.00847644	0.00941998	0.035227	-0.00368	0.008868
1325.1	0.00822286	0.00917836	0.034048	-0.00411	0.008376
1327.02	0.00812919	0.00909065	0.032914	-0.00429	0.008103
1328.95	0.00814324	0.00908666	0.032067	-0.00428	0.008002
1330.88	0.00813588	0.00908586	0.03162	-0.00429	0.007898
1332.81	0.00799203	0.00893515	0.031483	-0.00448	0.007707
1334.74	0.00834664	0.00931871	0.032016	-0.00401	0.008305
1336.67	0.00980922	0.0110268	0.033841	-0.00195	0.010424
1338.6	0.0122426	0.0137021	0.036624	0.0014	0.01385
1340.53	0.0120914	0.0134183	0.037485	0.001018	0.013648
1342.45	0.00934154	0.0104088	0.035948	-0.00267	0.010047
1344.38	0.0082717	0.00930675	0.03563	-0.00385	0.008955
1346.31	0.00816465	0.00925412	0.036088	-0.0037	0.009332
1348.24	0.00838544	0.00948138	0.036813	-0.00327	0.00999
1350.17	0.00862831	0.0096321	0.037411	-0.00298	0.010347
1352.1	0.00859085	0.00958505	0.03757	-0.00299	0.010366
1354.03	0.00899965	0.00999732	0.037921	-0.00236	0.011084
1355.96	0.00909532	0.00996542	0.038117	-0.00202	0.011513
1357.88	0.00883573	0.0096943	0.038095	-0.00194	0.011641
1359.81	0.00952018	0.0106432	0.038993	-0.00065	0.013108
1361.74	0.0118131	0.0131918	0.041222	0.002477	0.016586
1363.67	0.0120031	0.0132117	0.04158	0.002386	0.016883
1365.6	0.00968745	0.0107278	0.039766	-0.0006	0.013932
1367.53	0.00959779	0.0107007	0.039847	-0.0005	0.013891
1369.46	0.00982996	0.0109327	0.040146	-0.00021	0.014058
1371.39	0.00956367	0.0106385	0.040257	-0.00058	0.013514
1373.32	0.0114545	0.0126567	0.042807	0.001807	0.015974
1375.24	0.0121617	0.0134159	0.045915	0.002668	0.017222
1377.17	0.0105592	0.0117716	0.046274	0.000762	0.015428
1379.1	0.010036	0.0111616	0.044599	-0.00014	0.014317
1381.03	0.00921709	0.0102772	0.040032	-0.00164	0.012196
1382.96	0.00857345	0.00976048	0.035575	-0.00279	0.010383
1384.89	0.00896686	0.0104287	0.032962	-0.00244	0.010222
1386.82	0.0111527	0.0127149	0.032278	-5.1e-05	0.01228
1388.75	0.0105787	0.0119574	0.030064	-0.00124	0.010956
1390.67	0.00863367	0.010089	0.027932	-0.00357	0.008406
1392.6	0.00878889	0.0104423	0.02805	-0.00324	0.008513
1394.53	0.0117703	0.0135427	0.030811	0.000379	0.012092
1396.46	0.0127638	0.0145227	0.032127	0.001399	0.013198
1398.39	0.0123985	0.014195	0.031857	0.000714	0.012616
1400.32	0.0107352	0.0123944	0.029891	-0.00149	0.010325
1402.25	0.00868385	0.0102804	0.026993	-0.00389	0.007754
1404.18	0.00947402	0.0112182	0.025988	-0.0028	0.008671
1406.11	0.00934489	0.0111233	0.024521	-0.00297	0.008439
1408.03	0.00799002	0.00977723	0.023065	-0.00454	0.006896
1409.96	0.00804555	0.00996462	0.023937	-0.00421	0.007194
1411.89	0.00829779	0.0102341	0.026225	-0.00391	0.007653
1413.82	0.00814458	0.0100468	0.028752	-0.00421	0.00756
1415.75	0.00963459	0.011656	0.032112	-0.0021	0.009788
1417.68	0.0129706	0.0151798	0.035885	0.002032	0.014025
1419.61	0.0141695	0.0162276	0.036454	0.002956	0.015084
1421.54	0.0110871	0.0130546	0.03298	-0.00078	0.011431
1423.46	0.0106563	0.01288	0.031886	-0.001	0.0113
1425.39	0.0099136	0.0120307	0.031443	-0.00173	0.010847
1427.32	0.00879759	0.010853	0.031583	-0.00265	0.010306
1429.25	0.0102689	0.012333	0.034702	-0.00027	0.013432
1431.18	0.0108316	0.0127779	0.03784	0.00155	0.016482
1433.11	0.0102334	0.0121296	0.039721	0.002249	0.018349
1435.04	0.0112691	0.0132628	0.04253	0.00461	0.021186
1436.97	0.0138564	0.0158121	0.047175	0.007509	0.024135
1438.89	0.0115622	0.0132245	0.047172	0.004054	0.020484
1440.82	0.00958575	0.0111632	0.046809	0.001395	0.01753
1442.75	0.00911339	0.0107365	0.047656	0.000691	0.016659
1444.68	0.00931277	0.0109686	0.048816	0.000828	0.016717
1446.61	0.0108249	0.0124901	0.050997	0.0025	0.018445
1448.54	0.0121048	0.0136487	0.053946	0.003884	0.020173
1450.47	0.0113628	0.0127787	0.056034	0.003258	0.019832
1452.4	0.011872	0.0132652	0.060654	0.004377	0.021328
1454.33	0.0134837	0.0149549	0.066374	0.007027	0.024227
1456.26	0.0196773	0.0214396	0.075259	0.014563	0.032036
1458.18	0.0226848	0.0241014	0.078988	0.016969	0.035364
1460.11	0.0158449	0.0168592	0.073814	0.009168	0.027711
1462.04	0.0120553	0.0130132	0.070624	0.005038	0.023359
1463.97	0.0132797	0.0144326	0.072062	0.006456	0.024716
1465.9	0.0141247	0.0152803	0.071656	0.007226	0.025464
1467.83	0.0116652	0.0127891	0.0633	0.004327	0.021751
1469.76	0.0106502	0.0119989	0.050915	0.002683	0.01848
1471.68	0.0144793	0.0163185	0.04097	0.006216	0.020018
1473.61	0.0168652	0.0188766	0.030704	0.007207	0.019357
1475.54	0.0137213	0.015667	0.023896	0.002619	0.014175
1477.47	0.0107031	0.012502	0.018626	-0.00148	0.009591
1479.4	0.00865106	0.0104152	0.01547	-0.0039	0.006809
1481.33	0.00875744	0.0106337	0.014321	-0.00371	0.006727
1483.26	0.00808436	0.00990163	0.012961	-0.00457	0.005725
1485.19	0.00829177	0.0101839	0.012406	-0.0042	0.005933
1487.12	0.011241	0.0134382	0.014332	-0.00047	0.009482
1489.04	0.0154542	0.0178217	0.017244	0.004488	0.01438
1490.97	0.0141996	0.0161782	0.016021	0.002453	0.012548
1492.9	0.00940376	0.0111424	0.011697	-0.00329	0.006806
1494.83	0.0091455	0.0110069	0.011039	-0.00346	0.006492
1496.76	0.0126273	0.0146383	0.013497	0.00059	0.01056
1498.69	0.0128401	0.0147914	0.013733	0.001006	0.011188
1500.62	0.0108275	0.0128066	0.012092	-0.00091	0.009318
1502.55	0.0091803	0.0111305	0.010555	-0.00277	0.007254
1504.47	0.00993099	0.0120331	0.010607	-0.00206	0.007401
1506.4	0.021718	0.0245384	0.019702	0.011762	0.02022
1508.33	0.0248512	0.0276045	0.022588	0.015191	0.024359
1510.26	0.0166404	0.0190433	0.016043	0.00538	0.014858
1512.19	0.0124908	0.014726	0.012573	0.000302	0.009684
1514.12	0.0115408	0.0137452	0.011682	-0.00056	0.008712
1516.05	0.0145489	0.0169756	0.01394	0.003514	0.012742
1517.98	0.0155779	0.0179126	0.014757	0.004339	0.013637
1519.9	0.0156863	0.0182132	0.014524	0.004172	0.013157
1521.83	0.019769	0.0224874	0.017791	0.008475	0.017383
1523.76	0.0164417	0.0187905	0.015071	0.004487	0.013703
1525.69	0.0153023	0.0175625	0.014029	0.003424	0.012641
1527.62	0.0138631	0.0158719	0.013031	0.001921	0.011308
1529.55	0.0108148	0.0125874	0.010551	-0.00151	0.007975
1531.48	0.0104308	0.0124534	0.010045	-0.00157	0.007795
1533.41	0.0139742	0.0161471	0.012939	0.002717	0.012081
1535.34	0.0119409	0.0138927	0.011412	0.000471	0.010151
1537.27	0.0100467	0.0122636	0.009601	-0.00159	0.007827
1539.19	0.016342	0.0190975	0.01421	0.00529	0.013976
1541.12	0.0236877	0.0262847	0.020275	0.012997	0.022043
1543.05	0.0200761	0.0223255	0.017311	0.009181	0.01892
1544.98	0.0159218	0.01797	0.014066	0.004786	0.014819
1546.91	0.0104509	0.0121105	0.009712	-0.00166	0.008458
1548.84	0.00990423	0.0116025	0.009221	-0.00191	0.008215
1550.77	0.0106429	0.0124031	0.010026	-0.0006	0.009583
1552.69	0.00962054	0.0114439	0.009221	-0.00166	0.008281
1554.62	0.0113675	0.0134558	0.010488	0.000352	0.01011
1556.55	0.012262	0.0146686	0.010836	0.001013	0.010377
1558.48	0.0209258	0.0239562	0.017181	0.009716	0.017604
1560.41	0.018275	0.0202937	0.015954	0.005901	0.014574
1562.34	0.0105278	0.0120938	0.009683	-0.00275	0.00643
1564.27	0.00879826	0.0103338	0.008241	-0.00467	0.004379
1566.2	0.00828575	0.00979716	0.007964	-0.00517	0.003727
1568.13	0.00889862	0.0105404	0.008459	-0.00448	0.004284
1570.06	0.011132	0.0128625	0.010496	-0.00199	0.006894
1571.98	0.00825497	0.00982667	0.008156	-0.00517	0.003751
1573.91	0.00711889	0.00879081	0.006881	-0.00647	0.002138
1575.84	0.0108275	0.0126336	0.009768	-0.00247	0.005957
1577.77	0.0109299	0.0124526	0.010174	-0.00245	0.006424
1579.7	0.00741998	0.00886497	0.007321	-0.00634	0.002692
1581.63	0.00628858	0.00776054	0.006338	-0.00748	0.001559
1583.56	0.00610793	0.00754683	0.006246	-0.00751	0.001537
1585.48	0.00607381	0.00745433	0.006327	-0.00747	0.001545
1587.41	0.0058858	0.00726853	0.006224	-0.0076	0.001444
1589.34	0.00616815	0.00759946	0.00646	-0.00724	0.001862
1591.27	0.00631601	0.00780839	0.006597	-0.00715	0.00199
1593.2	0.00643711	0.00799897	0.006667	-0.00702	0.002097
1595.13	0.00685595	0.00839449	0.006981	-0.00652	0.002585
1597.06	0.00658029	0.00793597	0.006793	-0.00684	0.002323
1598.99	0.00617551	0.00743838	0.00649	-0.00724	0.00193
1600.92	0.00662512	0.00801572	0.006955	-0.00646	0.002719
1602.84	0.00710083	0.00855717	0.007443	-0.00586	0.003486
1604.77	0.00689007	0.00836579	0.007273	-0.00615	0.003355
1606.7	0.00706336	0.00865126	0.007439	-0.00566	0.003893
1608.63	0.00770232	0.00926608	0.008023	-0.0047	0.004961
1610.56	0.00726274	0.0087007	0.007691	-0.00519	0.00471
1612.49	0.00654617	0.00796787	0.007162	-0.00582	0.004267
1614.42	0.00699512	0.00857551	0.007454	-0.00525	0.004805
1616.35	0.0107867	0.0124295	0.010588	-0.0013	0.008783
1618.28	0.0108857	0.0123481	0.011017	-0.00085	0.009542
1620.2	0.00827505	0.00974134	0.008892	-0.00332	0.007068
1622.13	0.00923315	0.0108912	0.009564	-0.00222	0.007967
1624.06	0.010766	0.0124287	0.010943	-0.00084	0.009274
1625.99	0.00913145	0.0106783	0.009705	-0.00285	0.007341
1627.92	0.00931679	0.0108266	0.009967	-0.00263	0.00762
1629.85	0.00834396	0.0097557	0.009402	-0.00355	0.006727
1631.78	0.00705333	0.0084838	0.008397	-0.00482	0.005376
1633.7	0.00817803	0.00980673	0.009058	-0.00351	0.006375
1635.63	0.0148139	0.0166327	0.014683	0.00353	0.013252
1637.56	0.0143683	0.0159868	0.015104	0.002763	0.013039
1639.49	0.0100628	0.01164	0.011981	-0.00176	0.008679
1641.42	0.00840083	0.00999572	0.011039	-0.00319	0.007276
1643.35	0.00815595	0.00979397	0.011276	-0.00305	0.007412
1645.28	0.0110978	0.0130315	0.014047	0.000698	0.011063
1647.21	0.0173791	0.0193918	0.020053	0.00798	0.018721
1649.14	0.0135982	0.0152771	0.017207	0.00363	0.014658
1651.07	0.0108516	0.0127062	0.014487	0.00059	0.011175
1652.99	0.0196452	0.0215999	0.021084	0.009709	0.019734
1654.92	0.0179398	0.019375	0.020655	0.008051	0.01972
1656.85	0.0110356	0.0124406	0.015101	0.000952	0.012878
1658.78	0.00821884	0.0097852	0.012643	-0.00181	0.009976
1660.71	0.00852929	0.0102254	0.012473	-0.00128	0.010246
1662.64	0.0108041	0.0124558	0.013903	0.001231	0.012553
1664.57	0.00958241	0.0110706	0.012691	-0.00018	0.011262
1666.49	0.008263	0.00990003	0.01132	-0.00137	0.00987
1668.42	0.0112383	0.0130818	0.013393	0.002043	0.012856
1670.35	0.0142592	0.0159852	0.015873	0.004869	0.015726
1672.28	0.0117502	0.0133776	0.013855	0.001746	0.012733
1674.21	0.0108951	0.0126966	0.013293	0.00081	0.01165
1676.14	0.0117214	0.0133792	0.014432	0.001608	0.012649
1678.07	0.0100902	0.0116719	0.01329	0.000199	0.011347
1680	0.0110497	0.0127947	0.014114	0.002053	0.013124
1681.93	0.0121724	0.0141543	0.015004	0.003691	0.014382
1683.86	0.0180481	0.0202139	0.019735	0.009716	0.019979
1685.78	0.0167488	0.0183838	0.019713	0.007525	0.018429
1687.71	0.0127076	0.0142356	0.016557	0.003334	0.014287
1689.64	0.0114036	0.0129175	0.016021	0.002284	0.013405
1691.57	0.00928199	0.0107126	0.015067	0.000241	0.011592
1693.5	0.00834061	0.0098155	0.014676	-0.00029	0.011049
1695.43	0.0126227	0.0143497	0.018604	0.005187	0.016668
1697.36	0.0161574	0.0179939	0.022525	0.009356	0.021475
1699.29	0.0161921	0.018021	0.022917	0.009092	0.021112
1701.21	0.0170198	0.0184636	0.025042	0.010021	0.023103
1703.14	0.0132482	0.0147803	0.022555	0.006276	0.019848
1705.07	0.013374	0.0149421	0.023312	0.006567	0.020258
1707	0.0126735	0.0139956	0.023907	0.006075	0.019955
1708.93	0.0103371	0.0115746	0.02295	0.004049	0.017964
1710.86	0.00965533	0.0108833	0.023168	0.003739	0.017631
1712.79	0.0101799	0.0116049	0.024646	0.004969	0.01877
1714.72	0.0136477	0.0154182	0.028775	0.009623	0.023168
1716.64	0.0179578	0.0198423	0.034573	0.014775	0.028194
1718.57	0.0176628	0.0190919	0.03818	0.01401	0.028052
1720.5	0.0123798	0.0134039	0.037238	0.008448	0.022761
1722.43	0.010584	0.0115619	0.039474	0.007287	0.021538
1724.36	0.0104756	0.0114231	0.045812	0.008268	0.022778
1726.29	0.00996913	0.010829	0.053114	0.008676	0.023534
1728.22	0.0113119	0.012136	0.064231	0.011378	0.026764
1730.15	0.0145924	0.0153385	0.081312	0.016205	0.03247
1732.08	0.0172386	0.0178783	0.099451	0.019713	0.037089
1734	0.0234087	0.0235073	0.133691	0.025317	0.046396
1735.93	0.0227898	0.0217601	0.168061	0.023253	0.049094
1737.86	0.0213754	0.0200209	0.187404	0.021541	0.049632
1739.79	0.0250954	0.0230974	0.2182	0.024193	0.056539
1741.72	0.0276245	0.0248996	0.238512	0.025319	0.060659
1743.65	0.0298318	0.0267034	0.244639	0.025692	0.061606
1745.58	0.0302413	0.0270112	0.237192	0.023492	0.057533
1747.51	0.0313318	0.0283094	0.220957	0.022116	0.052381
1749.43	0.0315948	0.0289258	0.193798	0.019695	0.04519
1751.36	0.0281959	0.0259785	0.159047	0.014188	0.035107
1753.29	0.0219475	0.0202219	0.126614	0.006744	0.024225
1755.22	0.0184027	0.0172826	0.10383	0.003242	0.018554
1757.15	0.0172366	0.016789	0.080303	0.002895	0.016261
1759.08	0.0146279	0.0145889	0.062202	0.000719	0.01275
1761.01	0.0139528	0.0143521	0.050173	0.000469	0.011557
1762.94	0.0131097	0.0137907	0.039056	-0.00013	0.010216
1764.87	0.0103291	0.0110746	0.031025	-0.00312	0.006875
1766.79	0.0101765	0.0110762	0.026864	-0.00297	0.006722
1768.72	0.0114136	0.0124486	0.02438	-0.00142	0.007838
1770.65	0.0126006	0.0137612	0.023043	-0.00052	0.008207
1772.58	0.0151317	0.0163863	0.023068	0.001783	0.010295
1774.51	0.0127959	0.0140347	0.019927	-0.0007	0.007904
1776.44	0.0102515	0.0115332	0.016934	-0.00332	0.005032
1778.37	0.00937767	0.010644	0.015356	-0.00424	0.003888
1780.3	0.0103779	0.0116384	0.015463	-0.00313	0.004988
1782.22	0.00978781	0.0109821	0.014461	-0.00388	0.004174
1784.15	0.00930809	0.0105619	0.013593	-0.00438	0.003612
1786.08	0.00899563	0.0101983	0.012913	-0.00481	0.003131
1788.01	0.00793717	0.00915284	0.011634	-0.00596	0.001818
1789.94	0.00909465	0.0105986	0.012107	-0.00441	0.003175
1791.87	0.0124882	0.0141846	0.014524	-0.00067	0.006754
1793.8	0.0123523	0.0137947	0.014184	-0.00115	0.006383
1795.73	0.010503	0.0119526	0.012491	-0.00306	0.00445
1797.65	0.00945997	0.0109311	0.011423	-0.00433	0.002998
1799.58	0.0100006	0.0114478	0.011586	-0.00395	0.003295
1801.51	0.0109968	0.0124813	0.012199	-0.00266	0.004633
1803.44	0.00930809	0.0107612	0.010788	-0.00457	0.002763
1805.37	0.00788632	0.00927963	0.00955	-0.00624	0.001029
1807.3	0.00794453	0.00934981	0.009383	-0.00614	0.001018
1809.23	0.00888323	0.0102581	0.009801	-0.00526	0.001786
1811.16	0.00968611	0.0111057	0.010259	-0.00435	0.002624
1813.09	0.00869188	0.0101002	0.009457	-0.00549	0.001482
1815.01	0.00747752	0.00886577	0.00843	-0.00697	-4.1e-05
1816.94	0.00770032	0.00904838	0.008474	-0.00669	0.000257
1818.87	0.00752034	0.0088267	0.008245	-0.00687	0.000106
1820.8	0.00724267	0.00857232	0.00796	-0.0071	-0.00016
1822.73	0.0075016	0.00899416	0.008027	-0.00665	0.000281
1824.66	0.00914617	0.0107485	0.009239	-0.00469	0.00219
1826.59	0.00938704	0.0108019	0.009302	-0.00462	0.002168
1828.52	0.00996511	0.0114742	0.009505	-0.00414	0.002506
1830.44	0.0113206	0.0128314	0.01054	-0.00284	0.003874
1832.37	0.00898493	0.0103115	0.008663	-0.00562	0.00128
1834.3	0.00753572	0.00894472	0.007469	-0.00708	-0.00017
1836.23	0.00774046	0.00921185	0.007598	-0.00664	0.000328
1838.16	0.00783814	0.00922621	0.007694	-0.00641	0.000565
1840.09	0.00734972	0.0087326	0.007199	-0.00678	6.28e-05
1842.02	0.00817469	0.00977563	0.007661	-0.00565	0.001089
1843.95	0.0110403	0.0127054	0.009867	-0.00251	0.00409
1845.88	0.0111628	0.0127205	0.01003	-0.00251	0.004065
1847.8	0.0093857	0.0108697	0.008552	-0.00465	0.002034
1849.73	0.00807165	0.00943354	0.007532	-0.00635	0.000412
1851.66	0.00721256	0.00844553	0.006855	-0.00743	-0.00064
1853.59	0.00702255	0.0083004	0.006693	-0.00754	-0.00077
1855.52	0.00694226	0.00827089	0.006504	-0.00756	-0.0008
1857.45	0.00726877	0.00857391	0.006726	-0.00711	-0.00034
1859.38	0.00751364	0.00875413	0.006907	-0.00679	2.73e-06
1861.31	0.00749625	0.00873101	0.006863	-0.00678	-1.1e-05
1863.23	0.00717443	0.00842798	0.006501	-0.00707	-0.00039
1865.16	0.00759594	0.00898299	0.006807	-0.00643	0.000175
1867.09	0.00972626	0.0113306	0.008485	-0.00393	0.002733
1869.02	0.0118378	0.0134255	0.010281	-0.00169	0.005051
1870.95	0.00981993	0.0111552	0.008733	-0.00423	0.00246
1872.88	0.00761334	0.00886338	0.006892	-0.00684	-0.00024
1874.81	0.00705132	0.00832512	0.006479	-0.00743	-0.00084
1876.74	0.00707206	0.00832432	0.006538	-0.00738	-0.00071
1878.66	0.00711689	0.00836579	0.006504	-0.00729	-0.00059
1880.59	0.00705801	0.00838811	0.006442	-0.00731	-0.00064
1882.52	0.00707206	0.00840167	0.006456	-0.0073	-0.00069
1884.45	0.00725405	0.00857312	0.006571	-0.00705	-0.00043
1886.38	0.00708879	0.00839051	0.006368	-0.00725	-0.00061
1888.31	0.00790438	0.00929399	0.007022	-0.00624	0.000311
1890.24	0.00883773	0.0102445	0.007835	-0.00517	0.001428
1892.17	0.00780268	0.0091058	0.006944	-0.00649	0.000117
1894.1	0.00791442	0.009168	0.006892	-0.00644	6.55e-05
1896.02	0.00820948	0.00937852	0.007062	-0.00622	0.000224
1897.95	0.00738853	0.00859385	0.006449	-0.00715	-0.00065
1899.88	0.00696702	0.00825893	0.006157	-0.00756	-0.00093
1901.81	0.00700181	0.00832751	0.006131	-0.00743	-0.00086
1903.74	0.00699512	0.00830757	0.006131	-0.00733	-0.00088
1905.67	0.0070473	0.00833309	0.006157	-0.00725	-0.00084
1907.6	0.00765214	0.00904519	0.006645	-0.00651	-4.9e-05
1909.53	0.00835199	0.00979477	0.007251	-0.00572	0.000797
1911.45	0.00781205	0.00913371	0.006907	-0.00645	0.000106
1913.38	0.00709949	0.00833389	0.006283	-0.00729	-0.00078
1915.31	0.00701653	0.00840406	0.006131	-0.00727	-0.0008
1917.24	0.00808838	0.00964565	0.007	-0.00588	0.000549
1919.17	0.00849918	0.0100141	0.007362	-0.00539	0.001037
1921.1	0.00822687	0.00979716	0.007092	-0.00565	0.000745
1923.03	0.00919234	0.0107485	0.007942	-0.00449	0.001903
1924.96	0.00819743	0.00957309	0.007192	-0.00587	0.000541
1926.88	0.00722996	0.00857312	0.006368	-0.0071	-0.0007
1928.81	0.0070172	0.00836818	0.006168	-0.00733	-0.00093
1930.74	0.00705667	0.00842719	0.006194	-0.00726	-0.00082
1932.67	0.00709548	0.00850215	0.006201	-0.00715	-0.00069
1934.6	0.00709681	0.00844314	0.006224	-0.00712	-0.00074
1936.53	0.00691014	0.00828126	0.00609	-0.00732	-0.00093
1938.46	0.00685461	0.00824378	0.00602	-0.00734	-0.00088
1940.39	0.00742934	0.00888331	0.00639	-0.00653	-0.00014
1942.32	0.00908663	0.0105491	0.007683	-0.00454	0.001764
1944.24	0.00885446	0.010223	0.007576	-0.00509	0.001291
1946.17	0.00795456	0.00927963	0.006911	-0.00639	6.01e-05
1948.1	0.00741328	0.00872861	0.006479	-0.00699	-0.00062
1950.03	0.00710284	0.00843436	0.006168	-0.0072	-0.00091
1951.96	0.00696702	0.00836499	0.006065	-0.00721	-0.00098
1953.89	0.00712558	0.00853803	0.006201	-0.00698	-0.00075
1955.82	0.0073156	0.00868316	0.006331	-0.00684	-0.00054
1957.75	0.00714967	0.00847264	0.006127	-0.00716	-0.00074
1959.67	0.0070473	0.00838891	0.006005	-0.00721	-0.00078
1961.6	0.00699645	0.0083913	0.00602	-0.00716	-0.00073
1963.53	0.0070172	0.00840885	0.006039	-0.00717	-0.00073
1965.46	0.00766419	0.00909623	0.006467	-0.00637	-1.1e-05
1967.39	0.00835734	0.00977803	0.006989	-0.00558	0.000737
1969.32	0.00760731	0.00897023	0.006471	-0.00657	-0.00023
1971.25	0.00696835	0.00837456	0.005987	-0.00738	-0.00097
1973.18	0.00686264	0.00829721	0.005869	-0.00751	-0.00111
1975.11	0.00690278	0.00829242	0.005887	-0.00741	-0.0011
1977.03	0.00696434	0.00832193	0.005939	-0.00731	-0.00102
1978.96	0.00695297	0.0083004	0.005902	-0.00734	-0.00099
1980.89	0.00693557	0.00824218	0.005928	-0.00737	-0.00108
1982.82	0.00686465	0.00816882	0.005898	-0.00737	-0.00123
1984.75	0.00689208	0.00826611	0.005987	-0.00731	-0.00111
1986.68	0.00714499	0.00867598	0.006227	-0.00689	-0.00069
1988.61	0.00744473	0.00906034	0.006397	-0.00641	-0.00026
1990.54	0.0078261	0.00949015	0.006608	-0.00593	0.000191
1992.46	0.00844566	0.0101568	0.007155	-0.00526	0.000958
1994.39	0.00762872	0.00917996	0.006475	-0.00644	-0.00016
1996.32	0.00705533	0.00849656	0.006024	-0.00723	-0.00094
1998.25	0.00707607	0.00847025	0.006098	-0.00718	-0.00089
2000.18	0.00709748	0.00847982	0.00612	-0.00711	-0.00086
2002.11	0.00704128	0.00845908	0.006083	-0.00713	-0.00094
2004.04	0.00692955	0.00848859	0.005998	-0.00721	-0.00098
2005.97	0.00691282	0.00847025	0.006017	-0.00726	-0.00103
2007.89	0.00702991	0.00857631	0.00622	-0.00708	-0.00088
2009.82	0.0069717	0.00856753	0.006183	-0.00713	-0.00088
2011.75	0.0068787	0.00843915	0.006098	-0.00719	-0.00088
2013.68	0.00685528	0.00837456	0.006153	-0.00713	-0.00081
2015.61	0.00729553	0.00890963	0.00656	-0.00659	-0.00023
2017.54	0.00787293	0.00951647	0.007003	-0.00594	0.000393
2019.47	0.00750896	0.00903483	0.00666	-0.00646	-0.00027
2021.4	0.00708678	0.00857152	0.006309	-0.00696	-0.00088
2023.33	0.00703526	0.00851171	0.00629	-0.00695	-0.00086
2025.26	0.00700649	0.00849896	0.006257	-0.00701	-0.00087
2027.18	0.00695029	0.00848939	0.006253	-0.00711	-0.00093
2029.11	0.00689743	0.00842639	0.006253	-0.00717	-0.00099
2031.04	0.00686866	0.00837456	0.006201	-0.00723	-0.00104
2032.97	0.00683789	0.0083307	0.006224	-0.00724	-0.001
2034.9	0.00691416	0.00831714	0.006231	-0.00717	-0.00096
2036.83	0.00697839	0.00837217	0.006235	-0.00701	-0.00094
2038.76	0.00698107	0.00848301	0.006253	-0.00693	-0.00089
2040.68	0.0073156	0.00876769	0.006482	-0.00661	-0.0005
2042.61	0.00735775	0.00874935	0.006556	-0.00666	-0.00046
2044.54	0.00704663	0.00848699	0.006349	-0.00702	-0.0008
2046.47	0.00694962	0.00841682	0.00629	-0.00702	-0.00084
2048.4	0.00686264	0.00834426	0.006153	-0.00712	-0.00096
2050.33	0.00682584	0.00834346	0.006061	-0.00719	-0.00109
2052.26	0.0068874	0.00830837	0.006094	-0.00713	-0.00108
2054.19	0.00692219	0.00830997	0.00612	-0.00706	-0.001
2056.12	0.00690546	0.00835781	0.006157	-0.00706	-0.001
2058.05	0.00686866	0.00838811	0.006187	-0.00704	-0.001
2059.97	0.00686866	0.00836818	0.006161	-0.00698	-0.00095
2061.9	0.00691884	0.0083929	0.006083	-0.00697	-0.00091
2063.83	0.00719115	0.00869831	0.00622	-0.00661	-0.00058
2065.76	0.00737381	0.00889767	0.006412	-0.00636	-0.00036
2067.69	0.00705533	0.00857152	0.006179	-0.00681	-0.00083
2069.62	0.00689342	0.0084232	0.006054	-0.00702	-0.00107
2071.55	0.00686197	0.00841363	0.006031	-0.00707	-0.00106
2073.47	0.00692018	0.0084846	0.006039	-0.00703	-0.00098
2075.4	0.00689409	0.00843516	0.005976	-0.00697	-0.00099
2077.33	0.00683922	0.00842798	0.005957	-0.00695	-0.00097
2079.26	0.00679908	0.00837854	0.005891	-0.007	-0.00103
2081.19	0.00680912	0.00831395	0.00585	-0.00704	-0.00108
2083.12	0.00681647	0.0083004	0.005884	-0.00708	-0.00113
2085.05	0.00681781	0.00836658	0.005832	-0.0071	-0.00116
2086.98	0.00674555	0.0084232	0.005743	-0.00704	-0.00119
2088.91	0.00688137	0.00858747	0.005872	-0.00681	-0.00096
2090.83	0.00691215	0.00860342	0.005924	-0.00679	-0.00085
2092.76	0.00668868	0.0084543	0.005754	-0.00703	-0.00108
2094.69	0.00665791	0.00837934	0.00564	-0.00712	-0.00125
2096.62	0.00665657	0.00836499	0.005658	-0.00715	-0.00132
2098.55	0.00664452	0.00843516	0.005673	-0.00711	-0.00131
2100.48	0.00666527	0.00849736	0.00571	-0.00705	-0.00121
2102.41	0.00665456	0.00846546	0.005721	-0.00709	-0.00123
2104.34	0.00675224	0.00844792	0.005721	-0.00708	-0.00127
2106.26	0.00675894	0.00843596	0.005669	-0.00705	-0.00128
2108.19	0.00663449	0.00835303	0.005569	-0.0071	-0.00131
2110.12	0.00660438	0.00831954	0.005566	-0.00711	-0.00132
2112.05	0.00665791	0.00840167	0.00558	-0.00708	-0.00131
2113.98	0.00669002	0.00848141	0.005584	-0.00701	-0.00129
2115.91	0.00672214	0.00843835	0.005562	-0.00699	-0.00126
2117.84	0.00667396	0.00832352	0.005466	-0.00709	-0.00134
2119.77	0.0066298	0.00833389	0.005444	-0.00712	-0.00135
2121.7	0.00666393	0.00837615	0.005459	-0.00711	-0.00135
2123.62	0.00675024	0.00845031	0.005532	-0.00702	-0.00126
2125.55	0.00673083	0.00846068	0.005514	-0.00705	-0.00131
2127.48	0.00672682	0.00846068	0.005473	-0.00708	-0.00137
2129.41	0.00665857	0.0083618	0.005425	-0.00711	-0.00143
2131.34	0.0065455	0.00823102	0.005381	-0.00713	-0.00144
2133.27	0.0065067	0.00821507	0.005344	-0.00713	-0.0014
2135.2	0.00658297	0.00834266	0.005385	-0.00702	-0.00135
2137.13	0.0066947	0.00841842	0.005459	-0.00697	-0.00132
2139.05	0.00676161	0.00845749	0.005499	-0.00703	-0.00127
2140.98	0.0067489	0.00842719	0.005473	-0.00711	-0.00131
2142.91	0.00675559	0.00841842	0.005536	-0.0071	-0.00135
2144.84	0.00678971	0.0084838	0.005606	-0.00707	-0.00132
2146.77	0.00680978	0.00850135	0.005584	-0.00701	-0.00132
2148.7	0.00679172	0.0083929	0.005536	-0.007	-0.00144
2150.63	0.00671946	0.00825175	0.005403	-0.00704	-0.00152
2152.56	0.00662044	0.00824378	0.005318	-0.00701	-0.00148
2154.49	0.00668868	0.00833229	0.005447	-0.00693	-0.0014
2156.41	0.00673752	0.00837057	0.00554	-0.00694	-0.00132
2158.34	0.00677633	0.00838971	0.005551	-0.00693	-0.00125
2160.27	0.00677432	0.00838811	0.005532	-0.00689	-0.00124
2162.2	0.0068419	0.00842958	0.005566	-0.00679	-0.00114
2164.13	0.00685996	0.00842639	0.005577	-0.00682	-0.00118
2166.06	0.0068593	0.00846626	0.005536	-0.00686	-0.00126
2167.99	0.00682785	0.00843835	0.005507	-0.00686	-0.00131
2169.92	0.006777	0.00838253	0.005529	-0.00683	-0.00133
2171.84	0.00678637	0.00841283	0.005525	-0.00689	-0.00132
2173.77	0.0066927	0.00838971	0.005477	-0.00696	-0.00135
2175.7	0.00672816	0.00840566	0.005459	-0.0069	-0.0013
2177.63	0.00682852	0.00846387	0.005459	-0.00684	-0.00126
2179.56	0.00683119	0.00843835	0.005451	-0.00688	-0.0013
2181.49	0.00685595	0.00842798	0.00544	-0.0069	-0.00134
2183.42	0.00688004	0.00840087	0.005388	-0.0069	-0.00139
2185.35	0.00693022	0.00845669	0.005374	-0.00687	-0.00134
2187.28	0.00689609	0.00847902	0.005392	-0.00689	-0.0013
2189.2	0.00681915	0.00844074	0.005425	-0.00689	-0.00138
2191.13	0.00678302	0.00843436	0.005425	-0.00688	-0.00144
2193.06	0.00675827	0.00838732	0.005385	-0.00689	-0.00142
2194.99	0.0067208	0.00839609	0.005418	-0.0069	-0.00143
2196.92	0.00674555	0.00847424	0.00547	-0.00688	-0.0014
2198.85	0.00676964	0.00840805	0.005366	-0.00689	-0.00141
2200.78	0.00672414	0.00837376	0.005252	-0.00685	-0.00146
2202.71	0.00660906	0.00834585	0.005215	-0.0069	-0.00151
2204.63	0.00662044	0.00840885	0.005266	-0.00693	-0.00148
2206.56	0.00665724	0.00841204	0.0053	-0.00689	-0.00147
2208.49	0.00663181	0.00828923	0.005274	-0.00695	-0.0016
2210.42	0.00661776	0.00822145	0.005237	-0.007	-0.00161
2212.35	0.00658163	0.00825335	0.00524	-0.00696	-0.00148
2214.28	0.0065823	0.0082988	0.005266	-0.00694	-0.00145
2216.21	0.00667731	0.00836738	0.005322	-0.00689	-0.00143
2218.14	0.00673819	0.0084224	0.005322	-0.00683	-0.00145
2220.07	0.00673953	0.00843835	0.005318	-0.00684	-0.00146
2221.99	0.00665991	0.00840964	0.00527	-0.00689	-0.0015
2223.92	0.00664921	0.00835542	0.005289	-0.00684	-0.0015
2225.85	0.00667196	0.00831236	0.005274	-0.00683	-0.00144
2227.78	0.00671009	0.00833788	0.005311	-0.00676	-0.00143
2229.71	0.00675024	0.0083929	0.00544	-0.00664	-0.00138
2231.64	0.00681581	0.00849975	0.005492	-0.00662	-0.00127
2233.57	0.00684458	0.00852846	0.005459	-0.00667	-0.00122
2235.49	0.00686599	0.00852208	0.00547	-0.00667	-0.00128
2237.42	0.00687268	0.00854999	0.005507	-0.00666	-0.00135
2239.35	0.00692888	0.00863771	0.005521	-0.00659	-0.00124
2241.28	0.00697103	0.00864329	0.005555	-0.00651	-0.00118
2243.21	0.00695631	0.00860422	0.005584	-0.00644	-0.00117
2245.14	0.0069436	0.00861299	0.005521	-0.00634	-0.00113
2247.07	0.00698307	0.00863213	0.005518	-0.00627	-0.00105
2249	0.00706202	0.00870389	0.005599	-0.00621	-0.00098
2250.93	0.00714097	0.00884823	0.005717	-0.0061	-0.00089
2252.86	0.00726676	0.00895269	0.005817	-0.00596	-0.00076
2254.78	0.0073698	0.00908586	0.005869	-0.00582	-0.00059
2256.71	0.00747283	0.00920149	0.005665	-0.00538	-0.00051
2258.64	0.0075471	0.00920787	0.005244	-0.0061	-0.00115
2260.57	0.00753104	0.00917358	0.005126	-0.00637	-0.00142
2262.5	0.00759728	0.00929638	0.005122	-0.00642	-0.00154
2264.43	0.00768626	0.00940483	0.005093	-0.00644	-0.00164
2266.36	0.00774715	0.00945427	0.005141	-0.00633	-0.00161
2268.28	0.00781272	0.0094766	0.005152	-0.00626	-0.00159
2270.21	0.00794185	0.00959382	0.005119	-0.00628	-0.00155
2272.14	0.00805291	0.00968552	0.005111	-0.00637	-0.0016
2274.07	0.00804823	0.00965442	0.005059	-0.00648	-0.00173
2276	0.00797129	0.00958664	0.005022	-0.00648	-0.00177
2277.93	0.00792245	0.00954199	0.00513	-0.00637	-0.00162
2279.86	0.00782209	0.00946065	0.005185	-0.0063	-0.00156
2281.79	0.00771771	0.00941839	0.005163	-0.0063	-0.00161
2283.72	0.00774514	0.00949574	0.005115	-0.00629	-0.00161
2285.64	0.00722528	0.00908108	0.005082	-0.00632	-0.00164
2287.57	0.00677365	0.00859863	0.005107	-0.00634	-0.00172
2289.5	0.00658297	0.00840964	0.005104	-0.00634	-0.0017
2291.43	0.0065997	0.00836419	0.005093	-0.00633	-0.00163
2293.36	0.00659033	0.00834824	0.005119	-0.00629	-0.00158
2295.29	0.00663449	0.00840885	0.005137	-0.00625	-0.0015
2297.22	0.0066753	0.00841842	0.005163	-0.00621	-0.0015
2299.15	0.00668266	0.00837137	0.005141	-0.00621	-0.00153
2301.07	0.00665724	0.0083602	0.005185	-0.00612	-0.00151
2303	0.00658899	0.00835781	0.005274	-0.00609	-0.00147
2304.93	0.00654684	0.00830359	0.00527	-0.0061	-0.00153
2306.86	0.00656022	0.00834107	0.005181	-0.00611	-0.00156
2308.79	0.00659568	0.00844553	0.00517	-0.00609	-0.00146
2310.72	0.00661575	0.00846307	0.005229	-0.0061	-0.00137
2312.65	0.00656892	0.00840805	0.005248	-0.00606	-0.00137
2314.58	0.00654684	0.008361	0.005222	-0.00601	-0.00139
2316.51	0.0065736	0.00836898	0.005248	-0.00596	-0.00137
2318.43	0.00660505	0.00838253	0.005311	-0.00589	-0.00125
2320.36	0.00659434	0.00842161	0.005303	-0.0059	-0.00121
2322.29	0.00662111	0.00847264	0.005285	-0.00591	-0.00121
2324.22	0.00669604	0.00850135	0.005314	-0.00582	-0.00117
2326.15	0.00672414	0.00850135	0.005296	-0.00576	-0.00119
2328.08	0.0066666	0.00849417	0.005274	-0.00581	-0.00127
2330.01	0.00667463	0.00848141	0.005204	-0.00581	-0.00129
2331.94	0.00669203	0.00844314	0.005266	-0.0057	-0.00126
2333.86	0.00671946	0.00844872	0.005392	-0.00567	-0.00119
2335.79	0.00675827	0.00848301	0.005459	-0.0057	-0.00112
2337.72	0.00678503	0.00851969	0.005355	-0.00578	-0.00112
2339.65	0.00679172	0.00854202	0.005277	-0.00577	-0.00113
2341.58	0.00683053	0.00859544	0.005255	-0.00576	-0.00123
2343.51	0.00680176	0.00855079	0.005233	-0.00581	-0.00124
2345.44	0.0067964	0.00858109	0.005192	-0.00586	-0.00129
2347.37	0.00681045	0.00870469	0.005207	-0.00592	-0.00133
2349.3	0.00683588	0.00867359	0.005233	-0.00594	-0.00134
2351.22	0.00684993	0.00859066	0.005311	-0.00585	-0.00125
2353.15	0.00685996	0.00860342	0.00534	-0.00579	-0.00118
2355.08	0.00682517	0.00860581	0.00527	-0.00578	-0.00122
2357.01	0.0068245	0.00860023	0.005185	-0.00582	-0.00127
2358.94	0.0068593	0.00862415	0.00524	-0.00583	-0.00126
2360.87	0.00687468	0.00866562	0.00517	-0.00583	-0.00127
2362.8	0.00687468	0.00866323	0.005196	-0.00576	-0.00123
2364.73	0.00691617	0.00871745	0.0053	-0.00567	-0.00114
2366.66	0.00689074	0.00872941	0.005307	-0.00572	-0.00115
2368.58	0.00685394	0.00869432	0.005285	-0.00574	-0.00111
2370.51	0.00683655	0.00863771	0.005333	-0.00566	-0.00105
2372.44	0.00680912	0.00860501	0.005359	-0.00562	-0.00099
2374.37	0.00670006	0.00853006	0.005337	-0.00562	-0.00099
2376.3	0.00666326	0.0084846	0.005337	-0.00566	-0.00104
2378.23	0.00667798	0.00847583	0.005362	-0.0056	-0.00109
2380.16	0.00674823	0.00853643	0.00537	-0.00553	-0.001
2382.09	0.00677432	0.00852766	0.005403	-0.0055	-0.00085
2384.01	0.00673083	0.0085157	0.005403	-0.00555	-0.0009
2385.94	0.00722528	0.0102852	0.005348	-0.00555	-0.00094
2387.87	0.00722528	0.00908108	0.005665	-0.00538	-0.00051
2389.8	0.00677365	0.00859863	0.005244	-0.0061	-0.00115
2391.73	0.00658297	0.00840964	0.005126	-0.00637	-0.00142
2393.66	0.0065997	0.00836419	0.005122	-0.00642	-0.00154
2395.59	0.00659033	0.00834824	0.005093	-0.00644	-0.00164
2397.52	0.00663449	0.00840885	0.005141	-0.00633	-0.00161
2399.45	0.0066753	0.00841842	0.005152	-0.00626	-0.00159
2401.37	0.00668266	0.00837137	0.005119	-0.00628	-0.00155
2403.3	0.00665724	0.0083602	0.005111	-0.00637	-0.0016
2405.23	0.00658899	0.00835781	0.005059	-0.00648	-0.00173
2407.16	0.00654684	0.00830359	0.005022	-0.00648	-0.00177
2409.09	0.00656022	0.00834107	0.00513	-0.00637	-0.00162
2411.02	0.00659568	0.00844553	0.005185	-0.0063	-0.00156
2412.95	0.00661575	0.00846307	0.005163	-0.0063	-0.00161
2414.88	0.00656892	0.00840805	0.005115	-0.00629	-0.00161
2416.8	0.00654684	0.008361	0.005082	-0.00632	-0.00164
2418.73	0.0065736	0.00836898	0.005107	-0.00634	-0.00172
2420.66	0.00660505	0.00838253	0.005104	-0.00634	-0.0017
2422.59	0.00659434	0.00842161	0.005093	-0.00633	-0.00163
2424.52	0.00662111	0.00847264	0.005119	-0.00629	-0.00158
2426.45	0.00669604	0.00850135	0.005137	-0.00625	-0.0015
2428.38	0.00672414	0.00850135	0.005163	-0.00621	-0.0015
2430.31	0.0066666	0.00849417	0.005141	-0.00621	-0.00153
2432.23	0.00667463	0.00848141	0.005185	-0.00612	-0.00151
2434.16	0.00669203	0.00844314	0.005274	-0.00609	-0.00147
2436.09	0.00671946	0.00844872	0.00527	-0.0061	-0.00153
2438.02	0.00675827	0.00848301	0.005181	-0.00611	-0.00156
2439.95	0.00678503	0.00851969	0.00517	-0.00609	-0.00146
2441.88	0.00679172	0.00854202	0.005229	-0.0061	-0.00137
2443.81	0.00683053	0.00859544	0.005248	-0.00606	-0.00137
2445.74	0.00680176	0.00855079	0.005222	-0.00601	-0.00139
2447.66	0.0067964	0.00858109	0.005248	-0.00596	-0.00137
2449.59	0.00681045	0.00870469	0.005311	-0.00589	-0.00125
2451.52	0.00683588	0.00867359	0.005303	-0.0059	-0.00121
2453.45	0.00684993	0.00859066	0.005285	-0.00591	-0.00121
2455.38	0.00685996	0.00860342	0.005314	-0.00582	-0.00117
2457.31	0.00682517	0.00860581	0.005296	-0.00576	-0.00119
2459.24	0.0068245	0.00860023	0.005274	-0.00581	-0.00127
2461.17	0.0068593	0.00862415	0.005204	-0.00581	-0.00129
2463.09	0.00687468	0.00866562	0.005266	-0.0057	-0.00126
2465.02	0.00687468	0.00866323	0.005392	-0.00567	-0.00119
2466.95	0.00691617	0.00871745	0.005459	-0.0057	-0.00112
2468.88	0.00689074	0.00872941	0.005355	-0.00578	-0.00112
2470.81	0.00685394	0.00869432	0.005277	-0.00577	-0.00113
2472.74	0.00683655	0.00863771	0.005255	-0.00576	-0.00123
2474.67	0.00680912	0.00860501	0.005233	-0.00581	-0.00124
2476.6	0.00670006	0.00853006	0.005192	-0.00586	-0.00129
2478.53	0.00666326	0.0084846	0.005207	-0.00592	-0.00133
2480.45	0.00667798	0.00847583	0.005233	-0.00594	-0.00134
2482.38	0.00674823	0.00853643	0.005311	-0.00585	-0.00125
2484.31	0.00677432	0.00852766	0.00534	-0.00579	-0.00118
2486.24	0.00673083	0.0085157	0.00527	-0.00578	-0.00122
2488.17	0.00673686	0.00851251	0.005185	-0.00582	-0.00127
2490.1	0.0068138	0.00851331	0.00524	-0.00583	-0.00126
2492.03	0.00676429	0.0084838	0.00517	-0.00583	-0.00127
2493.96	0.00670474	0.00848939	0.005196	-0.00576	-0.00123
2495.89	0.0067034	0.0084846	0.0053	-0.00567	-0.00114
2497.81	0.00671946	0.0084543	0.005307	-0.00572	-0.00115
2499.74	0.00673083	0.00846148	0.005285	-0.00574	-0.00111
2501.67	0.0067402	0.00852128	0.005333	-0.00566	-0.00105
2503.6	0.00674087	0.00856514	0.005359	-0.00562	-0.00099
2505.53	0.00679908	0.00860023	0.005337	-0.00562	-0.00099
2507.46	0.00682718	0.00861219	0.005337	-0.00566	-0.00104
2509.39	0.00680845	0.00858428	0.005362	-0.0056	-0.00109
2511.32	0.0067857	0.00858906	0.00537	-0.00553	-0.001
2513.24	0.0068526	0.00868316	0.005403	-0.0055	-0.00085
2515.17	0.00680577	0.00859305	0.005403	-0.00555	-0.0009
2517.1	0.00672682	0.00856195	0.005348	-0.00555	-0.00094
2519.03	0.00677566	0.00863691	0.005403	-0.00553	-0.00092
2520.96	0.00687937	0.00866641	0.005447	-0.00549	-0.00086
2522.89	0.00694226	0.00866801	0.005422	-0.00539	-0.0008
2524.82	0.00695899	0.0086401	0.005462	-0.00533	-0.00073
2526.75	0.00693624	0.00870868	0.005514	-0.00531	-0.00069
2528.68	0.00695096	0.00876051	0.005514	-0.00535	-0.00074
2530.6	0.00692553	0.0087023	0.005507	-0.00534	-0.00072
2532.53	0.00697705	0.00866243	0.005588	-0.00526	-0.00067
2534.46	0.00711421	0.00873898	0.00568	-0.00523	-0.00063
2536.39	0.00714967	0.00876928	0.005643	-0.00523	-0.00066
2538.32	0.00700381	0.00866801	0.005551	-0.00528	-0.00074
2540.25	0.00696099	0.00866721	0.005573	-0.00524	-0.0007
2542.18	0.00695297	0.00865206	0.005606	-0.00518	-0.00063
2544.11	0.00702054	0.00865366	0.005669	-0.00509	-0.00062
2546.03	0.00702188	0.00865685	0.005702	-0.00506	-0.00064
2547.96	0.00704262	0.00865764	0.005688	-0.00511	-0.00058
2549.89	0.00703927	0.00864568	0.005658	-0.00512	-0.00055
2551.82	0.00698976	0.00862016	0.005621	-0.00513	-0.0006
2553.75	0.00692219	0.00856036	0.005558	-0.00522	-0.0007
2555.68	0.00702054	0.00863133	0.005603	-0.00516	-0.00066
2557.61	0.00707741	0.00869034	0.005665	-0.00509	-0.00061
2559.54	0.00703526	0.00871745	0.005699	-0.00509	-0.00061
2561.47	0.00701452	0.00869592	0.005736	-0.00503	-0.00055
2563.39	0.00698107	0.00864169	0.005799	-0.00506	-0.00061
2565.32	0.0069824	0.0087031	0.005817	-0.00509	-0.00064
2567.25	0.00702924	0.00874695	0.005784	-0.0051	-0.00062
2569.18	0.00708745	0.00875254	0.005732	-0.00505	-0.00057
2571.11	0.00710953	0.00875333	0.00578	-0.00498	-0.0005
2573.04	0.00711153	0.00875652	0.005876	-0.00495	-0.00045
2574.97	0.0071015	0.00884743	0.005906	-0.00493	-0.0004
2576.89	0.00706604	0.00878762	0.005854	-0.00499	-0.00037
2578.82	0.00714231	0.00875812	0.00585	-0.00494	-0.00034
2580.75	0.00717175	0.00881713	0.005891	-0.00486	-0.00026
2582.68	0.00715904	0.00884344	0.005932	-0.00487	-0.00025
2584.61	0.00716305	0.00886418	0.005957	-0.0049	-0.00029
2586.54	0.00713361	0.00888571	0.005898	-0.00495	-0.00035
2588.47	0.00711756	0.00887534	0.00585	-0.00494	-0.00027
2590.4	0.00715837	0.00889607	0.005976	-0.00492	-0.00019
2592.33	0.00718982	0.00892797	0.006094	-0.00484	-0.00019
2594.26	0.00719985	0.00891282	0.006054	-0.00474	-0.00023
2596.18	0.00719182	0.00886258	0.006017	-0.00476	-0.00022
2598.11	0.00712425	0.00888092	0.006013	-0.00486	-0.00021
2600.04	0.00709146	0.00891681	0.006005	-0.0049	-0.00021
2601.97	0.00717108	0.00899655	0.006013	-0.00479	-0.00019
2603.9	0.00718714	0.00898778	0.00598	-0.00472	-0.00017
2605.83	0.007149	0.00897661	0.006039	-0.00473	-0.00011
2607.76	0.00714365	0.00896066	0.006131	-0.00471	-0.00014
2609.68	0.00714231	0.00898698	0.00615	-0.00473	-0.0002
2611.61	0.00710484	0.00902765	0.006135	-0.00473	-0.00022
2613.54	0.00712826	0.00908825	0.006194	-0.00468	-0.00021
2615.47	0.00713094	0.00908427	0.006127	-0.00469	-0.00019
2617.4	0.00715502	0.00912015	0.006098	-0.00471	-0.00011
2619.33	0.0071858	0.00909463	0.006183	-0.00466	-6.3e-05
2621.26	0.00720922	0.0091034	0.006235	-0.00465	-4.6e-05
2623.19	0.00710083	0.00905237	0.006194	-0.00471	-9.8e-05
2625.12	0.00704663	0.0090412	0.006264	-0.0047	-7.9e-05
2627.05	0.0070192	0.00903403	0.006301	-0.00467	-1.1e-05
2628.97	0.00705266	0.00907789	0.006338	-0.00462	-4.4e-05
2630.9	0.00707875	0.00908028	0.00639	-0.0046	-6.6e-05
2632.83	0.00707474	0.00905237	0.00646	-0.00462	-8.2e-06
2634.76	0.00705333	0.00900612	0.006467	-0.00458	-1.9e-05
2636.69	0.00704128	0.00897821	0.00639	-0.00457	-9.3e-05
2638.62	0.0070279	0.00902845	0.006405	-0.00454	-2.5e-05
2640.55	0.00701987	0.00905875	0.006405	-0.00457	6.28e-05
2642.47	0.0071296	0.00913769	0.006456	-0.00454	0.000101
2644.4	0.00717242	0.00914088	0.006497	-0.00445	9.01e-05
2646.33	0.00710685	0.00905237	0.006527	-0.00447	5.73e-05
2648.26	0.00707607	0.0090747	0.006564	-0.00442	0.000115
2650.19	0.00716038	0.00913929	0.006549	-0.00435	0.000213
2652.12	0.00717443	0.00911616	0.006604	-0.00441	0.000172
2654.05	0.00712625	0.00909623	0.006656	-0.00437	0.00012
2655.98	0.00713763	0.00910101	0.00666	-0.00437	0.000128
2657.91	0.00710953	0.00904041	0.00666	-0.00442	0.000134
2659.83	0.00705132	0.00902526	0.006711	-0.00441	0.000172
2661.76	0.00706537	0.00907151	0.006826	-0.00434	0.000221
2663.69	0.00716305	0.00914487	0.006966	-0.00421	0.000248
2665.62	0.00716974	0.00907789	0.007022	-0.00417	0.000227
2667.55	0.00718179	0.0090436	0.007059	-0.00423	0.000254
2669.48	0.00708343	0.00895429	0.007025	-0.00429	0.000292
2671.41	0.00713361	0.00902765	0.007173	-0.00418	0.000379
2673.34	0.00717309	0.00915284	0.007232	-0.00409	0.000379
2675.26	0.00721992	0.00916879	0.00721	-0.0041	0.000377
2677.19	0.00721792	0.00908347	0.00717	-0.00411	0.000325
2679.12	0.00721323	0.00906513	0.00717	-0.00415	0.000322
2681.05	0.00717309	0.00904519	0.007074	-0.00424	0.00039
2682.98	0.00721859	0.00907629	0.007066	-0.00421	0.000448
2684.91	0.00728349	0.00915045	0.007125	-0.00409	0.000475
2686.84	0.00723063	0.00908267	0.007099	-0.0041	0.000404
2688.77	0.00714766	0.00896385	0.007	-0.00423	0.000303
2690.7	0.00713964	0.0089814	0.006989	-0.00425	0.00033
2692.62	0.0071577	0.00901329	0.006929	-0.00414	0.000388
2694.55	0.00724736	0.00904679	0.006841	-0.00409	0.000377
2696.48	0.00718045	0.00901728	0.006763	-0.00416	0.000273
2698.41	0.00710217	0.00890883	0.006763	-0.00416	0.000251
2700.34	0.00705533	0.00883467	0.006711	-0.0042	0.000199
2702.27	0.00706336	0.00889129	0.006671	-0.00421	0.000188
2704.2	0.00705935	0.00893355	0.00666	-0.00419	0.000235
2706.13	0.0070366	0.00889607	0.006708	-0.00419	0.000273
2708.05	0.00709079	0.00887694	0.006711	-0.0042	0.00027
2709.98	0.00710351	0.00891362	0.0067	-0.00418	0.000309
2711.91	0.00696835	0.00887694	0.00666	-0.0042	0.000298
2713.84	0.00697036	0.00891441	0.006741	-0.00416	0.000344
2715.77	0.00703593	0.0090125	0.006841	-0.00412	0.000434
2717.7	0.00700515	0.00896625	0.006844	-0.00414	0.000401
2719.63	0.00692486	0.00893594	0.006782	-0.00417	0.000319
2721.56	0.00695029	0.00895907	0.006778	-0.00412	0.000366
2723.49	0.00700315	0.0089176	0.006959	-0.00407	0.000464
2725.41	0.00694427	0.00882749	0.007055	-0.00409	0.000532
2727.34	0.00689074	0.00881633	0.006992	-0.00407	0.000511
2729.27	0.00684123	0.00881952	0.006926	-0.00408	0.000429
2731.2	0.0068051	0.008794	0.006892	-0.00416	0.000407
2733.13	0.0067944	0.00876769	0.006874	-0.00417	0.000404
2735.06	0.00674756	0.00874377	0.006819	-0.00416	0.000292
2736.99	0.00681982	0.00879879	0.006885	-0.00409	0.000281
2738.92	0.00683922	0.00881952	0.006874	-0.0041	0.000278
2740.84	0.00679506	0.00875971	0.006774	-0.00416	0.000186
2742.77	0.00678436	0.00872861	0.006745	-0.00417	0.000175
2744.7	0.00687067	0.00877486	0.006822	-0.00417	0.000322
2746.63	0.00681982	0.00880118	0.006793	-0.00421	0.00033
2748.56	0.00684658	0.00878045	0.006722	-0.0042	0.000227
2750.49	0.00686398	0.00875413	0.006708	-0.0042	0.000197
2752.42	0.00686264	0.00880198	0.006715	-0.00416	0.000292
2754.35	0.00684658	0.00878603	0.006708	-0.00415	0.00033
2756.28	0.00683655	0.00873659	0.006704	-0.00421	0.000349
2758.2	0.00676563	0.00871665	0.006759	-0.0043	0.000309
2760.13	0.00680309	0.0087964	0.006837	-0.00424	0.000325
2762.06	0.00685729	0.00881314	0.006904	-0.00416	0.000374
2763.99	0.00690278	0.00881314	0.00694	-0.00412	0.000322
2765.92	0.00684123	0.00884105	0.006911	-0.00412	0.000349
2767.85	0.00677633	0.00887215	0.006948	-0.00413	0.000396
2769.78	0.00682517	0.00887614	0.006996	-0.00405	0.000434
2771.71	0.00688606	0.00890086	0.007011	-0.00404	0.000464
2773.63	0.00681313	0.00888092	0.007033	-0.00413	0.000491
2775.56	0.00692219	0.00888969	0.007184	-0.00402	0.000568
2777.49	0.00692754	0.00886258	0.007314	-0.00394	0.000636
2779.42	0.00690145	0.00886178	0.007428	-0.00397	0.000663
2781.35	0.00692486	0.00887215	0.007628	-0.00388	0.000762
2783.28	0.00686866	0.0088562	0.007798	-0.00376	0.000901
2785.21	0.00694293	0.00893515	0.007927	-0.00364	0.001029
2787.14	0.00701853	0.00904758	0.00809	-0.00358	0.001185
2789.07	0.00697973	0.00907549	0.008256	-0.00348	0.001305
2790.99	0.00696501	0.00903562	0.00843	-0.00335	0.001403
2792.92	0.00696635	0.00901967	0.008555	-0.00333	0.001469
2794.85	0.00695029	0.00903562	0.008722	-0.00334	0.001567
2796.78	0.00698374	0.00915125	0.008973	-0.00328	0.001676
2798.71	0.00709748	0.00921026	0.00928	-0.00315	0.001745
2800.64	0.00715302	0.0092294	0.00952	-0.00303	0.001911
2802.57	0.00717844	0.00919511	0.009701	-0.00298	0.00211
2804.49	0.00711555	0.0091664	0.009956	-0.00294	0.002217
2806.42	0.00710083	0.00914407	0.010366	-0.00283	0.002386
2808.35	0.00715302	0.00901489	0.010843	-0.0027	0.002605
2810.28	0.00720989	0.00908985	0.011361	-0.00254	0.002921
2812.21	0.00718982	0.00928601	0.011871	-0.00231	0.00329
2814.14	0.00722996	0.00942636	0.012488	-0.00204	0.003697
2816.07	0.00725672	0.00940483	0.013153	-0.00186	0.004054
2818	0.00745209	0.00944789	0.013918	-0.00163	0.004442
2819.93	0.00760665	0.00959302	0.014823	-0.00129	0.004912
2821.86	0.00768024	0.00969988	0.015851	-0.00097	0.005408
2823.78	0.00776053	0.00964326	0.016926	-0.00072	0.005856
2825.71	0.00788297	0.00971264	0.018312	-0.00044	0.006394
2827.64	0.00800073	0.00986016	0.019994	-6.3e-05	0.007104
2829.57	0.00823089	0.0100491	0.021993	0.000373	0.00801
2831.5	0.00842224	0.0101696	0.024229	0.000855	0.008969
2833.43	0.00862028	0.010337	0.026834	0.001485	0.010156
2835.36	0.00889996	0.0105388	0.029839	0.002251	0.011704
2837.28	0.00929872	0.0107453	0.033723	0.003266	0.013673
2839.21	0.00977242	0.0110667	0.03893	0.00461	0.01613
2841.14	0.0103853	0.0115459	0.046259	0.006306	0.019269
2843.07	0.0112544	0.0121567	0.056459	0.008468	0.023296
2845	0.0124494	0.012939	0.069841	0.010918	0.028153
2846.93	0.0137795	0.0138584	0.085677	0.013757	0.033791
2848.86	0.0152655	0.0148608	0.102104	0.017049	0.039929
2850.79	0.0169622	0.0160282	0.116288	0.020438	0.045747
2852.72	0.0185192	0.0172076	0.124467	0.02319	0.049875
2854.64	0.0191555	0.0177443	0.124023	0.024233	0.050795
2856.57	0.018833	0.0175593	0.115956	0.02342	0.048561
2858.5	0.0178996	0.0168831	0.103701	0.021407	0.04457
2860.43	0.0166786	0.015982	0.090374	0.018887	0.040008
2862.36	0.0153377	0.0150434	0.078245	0.0165	0.035724
2864.29	0.014126	0.0142739	0.068666	0.014572	0.032473
2866.22	0.013277	0.0136096	0.062113	0.013222	0.03034
2868.15	0.0127531	0.0131336	0.058466	0.012447	0.02909
2870.07	0.0124922	0.0129462	0.056862	0.012166	0.028467
2872	0.0123691	0.0129007	0.055298	0.01182	0.027755
2873.93	0.011967	0.0126671	0.052327	0.011052	0.026414
2875.86	0.0115174	0.0123872	0.048849	0.01011	0.02482
2877.79	0.0112323	0.0120658	0.046137	0.0093	0.023488
2879.72	0.0111005	0.0119614	0.044806	0.008854	0.022696
2881.65	0.0110296	0.0120164	0.044773	0.008684	0.022576
2883.58	0.0111025	0.0121224	0.045734	0.008846	0.022963
2885.51	0.0112002	0.0121998	0.04753	0.00929	0.02366
2887.43	0.0113508	0.0122437	0.050043	0.009856	0.024689
2889.36	0.0115996	0.0123298	0.053133	0.01056	0.026076
2891.29	0.0119456	0.0126041	0.056817	0.011475	0.027725
2893.22	0.0124039	0.012939	0.060883	0.012444	0.029551
2895.15	0.0128026	0.0132309	0.065033	0.013386	0.03137
2897.08	0.0131613	0.0135084	0.06939	0.014416	0.033267
2899.01	0.013647	0.0138784	0.074017	0.015532	0.035377
2900.94	0.0141635	0.014293	0.079121	0.01672	0.037575
2902.86	0.0147369	0.0147715	0.085045	0.017951	0.039833
2904.79	0.0153792	0.0152173	0.09169	0.019314	0.042429
2906.72	0.0161948	0.0157396	0.099137	0.020932	0.045367
2908.65	0.0168833	0.0162762	0.1076	0.022673	0.048646
2910.58	0.0177009	0.0168608	0.117552	0.024635	0.052493
2912.51	0.0187573	0.0173823	0.129005	0.026859	0.057142
2914.44	0.0199931	0.0180928	0.141696	0.02967	0.062551
2916.37	0.0214363	0.0191207	0.155267	0.033105	0.068808
2918.3	0.0231377	0.0203503	0.168142	0.036894	0.075525
2920.22	0.0249677	0.0216421	0.178383	0.040793	0.081954
2922.15	0.0267119	0.0229443	0.183997	0.044268	0.086972
2924.08	0.0277737	0.0237505	0.184352	0.046388	0.089459
2926.01	0.0280942	0.0240121	0.179835	0.046924	0.089178
2927.94	0.0278554	0.0239251	0.171435	0.046149	0.086554
2929.87	0.0271361	0.0235185	0.160551	0.04422	0.082293
2931.8	0.0259866	0.0227186	0.148071	0.041463	0.07687
2933.73	0.0246572	0.0217051	0.134796	0.03819	0.070788
2935.66	0.0229765	0.0205361	0.121536	0.03469	0.064577
2937.58	0.0211814	0.0192538	0.108904	0.031078	0.058505
2939.51	0.0197262	0.0181621	0.097784	0.027903	0.053083
2941.44	0.0185988	0.017411	0.088515	0.025323	0.04872
2943.37	0.0175343	0.0166686	0.080958	0.023216	0.04543
2945.3	0.0166458	0.0159126	0.075351	0.02175	0.043336
2947.23	0.016073	0.0154493	0.071899	0.021195	0.042443
2949.16	0.0157526	0.0153935	0.070351	0.02116	0.042421
2951.09	0.015693	0.015431	0.070122	0.021404	0.042801
2953.01	0.01578	0.0154517	0.070373	0.021626	0.042989
2954.94	0.0158021	0.0153265	0.070211	0.021522	0.042547
2956.87	0.0156094	0.0150825	0.068788	0.020909	0.041384
2958.8	0.0152655	0.0149063	0.065942	0.019998	0.039773
2960.73	0.0148098	0.0147181	0.062121	0.018927	0.03775
2962.66	0.0142485	0.0143497	0.057372	0.017553	0.035197
2964.59	0.0135801	0.0137962	0.051958	0.015881	0.032175
2966.52	0.0128341	0.0132293	0.046388	0.014095	0.028994
2968.45	0.0120747	0.0126846	0.041144	0.012171	0.025683
2970.37	0.0114471	0.0122484	0.036425	0.010372	0.022639
2972.3	0.0109687	0.0119997	0.03237	0.008803	0.019998
2974.23	0.0105191	0.0117341	0.029085	0.007404	0.017705
2976.16	0.0101424	0.0114399	0.026383	0.006175	0.015663
2978.09	0.00976038	0.0110986	0.023904	0.005192	0.013962
2980.02	0.00956167	0.0109088	0.021978	0.004446	0.012638
2981.95	0.00937633	0.0107405	0.02053	0.003701	0.011437
2983.88	0.0091154	0.0106058	0.019269	0.003058	0.010484
2985.8	0.00894478	0.0105316	0.018275	0.00267	0.009823
2987.73	0.00884175	0.0104263	0.017606	0.002371	0.009272
2989.66	0.00874875	0.0103227	0.017211	0.002132	0.008838
2991.59	0.00874139	0.010298	0.017155	0.002061	0.008605
2993.52	0.00871663	0.0102932	0.017384	0.002087	0.008515
2995.45	0.00876949	0.0103306	0.018157	0.002008	0.008362
2997.38	0.00873336	0.0103123	0.019351	0.001982	0.008251
2999.31	0.00890196	0.0103753	0.021021	0.002133	0.008529
3001.23	0.0092278	0.0105946	0.023312	0.002532	0.009176
3003.16	0.00958174	0.0110459	0.026021	0.003022	0.009995
3005.09	0.00999455	0.0113585	0.028627	0.003614	0.010803
3007.02	0.0103084	0.0114399	0.030537	0.004217	0.011439
3008.95	0.0103799	0.0115108	0.03124	0.004623	0.011909
3010.88	0.0103712	0.011518	0.030578	0.004795	0.012026
3012.81	0.0100421	0.0113402	0.028494	0.004553	0.011524
3014.74	0.00957638	0.0110938	0.025559	0.004043	0.010481
3016.66	0.00917294	0.0106959	0.022307	0.003461	0.009261
3018.59	0.00868385	0.0101528	0.019088	0.002696	0.007907
3020.52	0.00823289	0.0098801	0.016379	0.002099	0.006765
3022.45	0.00799404	0.00984581	0.014273	0.001683	0.006015
3024.38	0.00786424	0.00970466	0.012643	0.001307	0.005411
3026.31	0.00765013	0.00953082	0.011287	0.00092	0.00475
3028.24	0.0074173	0.00936097	0.010182	0.000469	0.004177
3030.17	0.00753104	0.00947102	0.009627	0.000278	0.004016
3032.09	0.00762605	0.00955714	0.009191	9.48e-05	0.003942
3034.02	0.00735574	0.00938729	0.008633	-0.00046	0.003432
3035.95	0.00715168	0.00921983	0.008149	-0.00088	0.00294
3037.88	0.00707206	0.00909383	0.007754	-0.00108	0.002667
3039.81	0.00696768	0.00905955	0.007399	-0.00125	0.002446
3041.74	0.0069155	0.00915364	0.007207	-0.00154	0.002274
3043.67	0.00681915	0.00907549	0.007018	-0.00179	0.00222
3045.6	0.00683454	0.00894392	0.006929	-0.00185	0.00222
3047.53	0.0069068	0.00900293	0.006874	-0.00176	0.002206
3049.45	0.00695832	0.00911218	0.006833	-0.00166	0.002176
3051.38	0.00682383	0.0089503	0.006556	-0.00184	0.001952
3053.31	0.0067857	0.00876769	0.006368	-0.00208	0.001821
3055.24	0.00695297	0.00892398	0.006575	-0.00187	0.001968
3057.17	0.00712358	0.00914487	0.006778	-0.00165	0.002067
3059.1	0.00693825	0.0089814	0.006626	-0.00172	0.001944
3061.03	0.00684123	0.00893275	0.006564	-0.00173	0.001821
3062.96	0.00690479	0.00900213	0.006552	-0.00172	0.001821
3064.89	0.00719918	0.00921744	0.006697	-0.00158	0.002059
3066.81	0.00732296	0.00926847	0.006737	-0.00152	0.002116
3068.74	0.00710551	0.00903881	0.006512	-0.00165	0.001914
3070.67	0.00686933	0.00883786	0.00609	-0.0019	0.001753
3072.6	0.00683119	0.00885381	0.005909	-0.00199	0.001709
3074.53	0.00682718	0.00884743	0.005869	-0.00189	0.001668
3076.46	0.00682317	0.00897183	0.005902	-0.0018	0.001706
3078.39	0.00690011	0.00917916	0.00585	-0.00179	0.001813
3080.32	0.00708009	0.00928043	0.005887	-0.00172	0.00193
3082.24	0.00696568	0.00906194	0.005736	-0.00186	0.001769
3084.17	0.0066947	0.00876131	0.005529	-0.00213	0.001526
3086.1	0.00659301	0.00869512	0.005407	-0.00219	0.001436
3088.03	0.00661843	0.0087956	0.005311	-0.00214	0.001384
3089.96	0.00661375	0.00881394	0.005229	-0.00208	0.00128
3091.89	0.00665389	0.00880836	0.005174	-0.00207	0.001199
3093.82	0.00677834	0.00889129	0.005152	-0.00204	0.001346
3095.75	0.00699177	0.00909942	0.005322	-0.00182	0.001654
3097.68	0.00688004	0.00905317	0.00527	-0.00189	0.001633
3099.6	0.00692353	0.00912493	0.005344	-0.00182	0.00157
3101.53	0.0070754	0.00919909	0.005473	-0.00173	0.00163
3103.46	0.00686799	0.00897502	0.005337	-0.00201	0.001327
3105.39	0.00667865	0.00882112	0.005063	-0.00222	0.001136
3107.32	0.00686331	0.00890724	0.00507	-0.00209	0.001253
3109.25	0.00702924	0.0088889	0.005096	-0.00201	0.00133
3111.18	0.00702456	0.00893834	0.005056	-0.00197	0.001439
3113.11	0.00690814	0.00897582	0.005022	-0.00194	0.001507
3115.03	0.00694761	0.00897342	0.005144	-0.0018	0.001635
3116.96	0.00698307	0.00905396	0.005229	-0.00166	0.001783
3118.89	0.00706604	0.00918634	0.00517	-0.00168	0.001791
3120.82	0.00713428	0.00915524	0.005074	-0.00171	0.001638
3122.75	0.00712358	0.00916879	0.005207	-0.00166	0.001597
3124.68	0.00701653	0.00923976	0.005218	-0.0017	0.001624
3126.61	0.00702857	0.00925571	0.0051	-0.0017	0.001633
3128.54	0.006963	0.00901409	0.004908	-0.00176	0.001491
3130.47	0.00689074	0.00896066	0.004819	-0.00188	0.001357
3132.39	0.00685194	0.00917278	0.004919	-0.00186	0.001466
3134.32	0.00689877	0.00917677	0.005004	-0.00173	0.001482
3136.25	0.00682785	0.00893834	0.004867	-0.00178	0.001371
3138.18	0.00676563	0.00889368	0.004812	-0.00182	0.001469
3140.11	0.00660438	0.00881553	0.004634	-0.00189	0.001436
3142.04	0.0066385	0.00874377	0.004568	-0.00198	0.001395
3143.97	0.00668801	0.00871027	0.004623	-0.00206	0.001392
3145.89	0.00657026	0.00862973	0.004694	-0.0021	0.001392
3147.82	0.00659769	0.00855797	0.004771	-0.00199	0.001469
3149.75	0.00672214	0.00871745	0.004841	-0.0019	0.001548
3151.68	0.00670407	0.00877885	0.004753	-0.00195	0.001575
3153.61	0.00672615	0.00868157	0.00476	-0.00181	0.001614
3155.54	0.00664051	0.00865525	0.004701	-0.00182	0.001491
3157.47	0.00670474	0.00867758	0.004668	-0.00181	0.001548
3159.4	0.00670273	0.00865764	0.004653	-0.00175	0.001665
3161.33	0.00656424	0.00874616	0.004657	-0.00181	0.001685
3163.26	0.00650335	0.00880676	0.004649	-0.00182	0.001794
3165.18	0.00661375	0.0087629	0.004738	-0.00169	0.001829
3167.11	0.00663716	0.00873978	0.004712	-0.00175	0.001837
3169.04	0.00668601	0.00890086	0.004797	-0.00179	0.001966
3170.97	0.00659234	0.00889528	0.004745	-0.00163	0.002075
3172.9	0.00665924	0.00881952	0.004531	-0.00152	0.002023
3174.83	0.00667196	0.00871506	0.004427	-0.00153	0.00196
3176.76	0.00673886	0.00880437	0.004542	-0.00144	0.002119
3178.68	0.00697638	0.00909543	0.004827	-0.00118	0.002337
3180.61	0.00685595	0.00911297	0.004797	-0.00122	0.002244
3182.54	0.00670809	0.00903961	0.004749	-0.00133	0.002113
3184.47	0.00684926	0.00905955	0.004845	-0.00135	0.00211
3186.4	0.00682986	0.0089822	0.004793	-0.00138	0.002187
3188.33	0.00671411	0.00892558	0.004771	-0.00135	0.002206
3190.26	0.00671411	0.00893036	0.004664	-0.0013	0.002233
3192.19	0.00672481	0.00890564	0.004464	-0.00122	0.002271
3194.12	0.0066017	0.0088259	0.004427	-0.00119	0.002351
3196.05	0.00674622	0.00900612	0.004694	-0.00109	0.002558
3197.97	0.00703861	0.00921983	0.004934	-0.00076	0.002837
3199.9	0.00696032	0.00911058	0.004782	-0.00087	0.002763
3201.83	0.00679172	0.00900373	0.004553	-0.00105	0.00261
3203.76	0.00664386	0.00881394	0.004435	-0.00121	0.002408
3205.69	0.00653011	0.00869911	0.004427	-0.00129	0.002318
3207.62	0.0064244	0.00871267	0.004549	-0.00116	0.002386
3209.55	0.00665657	0.00897422	0.004786	-0.00086	0.002703
3211.47	0.00686331	0.00906991	0.00486	-0.00076	0.002771
3213.4	0.0068981	0.00914009	0.004771	-0.00079	0.002798
3215.33	0.00690814	0.0091042	0.004653	-0.00093	0.002818
3217.26	0.0068138	0.00898857	0.004568	-0.00104	0.002774
3219.19	0.00690011	0.00910181	0.004775	-0.00084	0.003003
3221.12	0.00681581	0.00904758	0.004664	-0.00083	0.00291
3223.05	0.00664051	0.00886178	0.004527	-0.00096	0.002697
3224.98	0.00656156	0.00875254	0.004453	-0.00099	0.002637
3226.91	0.00671009	0.00893355	0.004645	-0.00075	0.002815
3228.83	0.00683922	0.00903004	0.004793	-0.00062	0.003011
3230.76	0.00689208	0.00909702	0.004867	-0.00056	0.003101
3232.69	0.00686331	0.00917677	0.004878	-0.00054	0.003159
3234.62	0.00675894	0.00902127	0.004719	-0.00077	0.003156
3236.55	0.00661174	0.00897821	0.004512	-0.00077	0.003145
3238.48	0.00655688	0.0089822	0.004524	-0.00076	0.003082
3240.41	0.00648194	0.00891362	0.004398	-0.00078	0.003
3242.34	0.00653547	0.0089495	0.004324	-0.00073	0.002897
3244.26	0.00674622	0.00906911	0.004524	-0.00055	0.003175
3246.19	0.00692486	0.00907151	0.004642	-0.00036	0.003424
3248.12	0.00680912	0.0089511	0.004479	-0.00053	0.003282
3250.05	0.0066927	0.00892717	0.004527	-0.00066	0.003241
3251.98	0.00663716	0.00885859	0.004542	-0.00063	0.003268
3253.91	0.00679573	0.00903722	0.004623	-0.00031	0.003577
3255.84	0.00679841	0.00902207	0.004616	-0.00032	0.003642
3257.77	0.00666727	0.00890724	0.004527	-0.00054	0.00356
3259.7	0.00658698	0.00880756	0.004516	-0.00053	0.003388
3261.62	0.0066104	0.00878683	0.004668	-0.00035	0.003407
3263.55	0.00663583	0.00882749	0.004638	-0.00032	0.003596
3265.48	0.00659301	0.00883866	0.004494	-0.00045	0.003612
3267.41	0.00639496	0.00880118	0.004354	-0.0005	0.00365
3269.34	0.00638559	0.00884823	0.004368	-0.00033	0.003759
3271.27	0.00652811	0.00887534	0.004439	-0.00021	0.003937
3273.2	0.0067964	0.00895668	0.004516	3.7e-05	0.004194
3275.13	0.00698307	0.00907151	0.004568	0.000286	0.004483
3277.05	0.00706671	0.00911776	0.004645	0.000273	0.004469
3278.98	0.00691684	0.00906911	0.004575	0.000172	0.004248
3280.91	0.00675425	0.00895748	0.004682	0.000167	0.004245
3282.84	0.00672749	0.00895987	0.004771	0.000185	0.004445
3284.77	0.00666058	0.00893754	0.004597	0.000161	0.004431
3286.7	0.0065629	0.00874935	0.004368	0.00013	0.00442
3288.63	0.00666326	0.00872861	0.004468	0.000349	0.004559
3290.56	0.00670407	0.00875014	0.004572	0.0005	0.004636
3292.49	0.00691617	0.00895987	0.004845	0.000551	0.004835
3294.41	0.00691148	0.00915284	0.004819	0.000516	0.004742
3296.34	0.00697438	0.00917118	0.004642	0.000363	0.0046
3298.27	0.00694561	0.00916082	0.004546	0.000326	0.004598
3300.2	0.00671478	0.0089822	0.004487	0.000318	0.004415
3302.13	0.0066365	0.00888969	0.004546	0.000386	0.004423
3304.06	0.00664854	0.0088251	0.004586	0.000384	0.004412
3305.99	0.00663516	0.00867838	0.00439	0.000225	0.004368
3307.92	0.0067944	0.00891681	0.004594	0.000391	0.004617
3309.84	0.00691215	0.00918793	0.004856	0.000612	0.004794
3311.77	0.0069175	0.00917517	0.004812	0.000543	0.004644
3313.7	0.00692219	0.00899097	0.004671	0.000519	0.004442
3315.63	0.00688204	0.00887534	0.004505	0.000397	0.004469
3317.56	0.0068593	0.00887694	0.004398	0.000291	0.004688
3319.49	0.00670809	0.00878762	0.004413	0.000273	0.004516
3321.42	0.00655755	0.00891441	0.004427	0.000362	0.004442
3323.35	0.00657293	0.00912334	0.004501	0.000415	0.00451
3325.28	0.00658297	0.00903243	0.004483	0.000367	0.004469
3327.2	0.00659033	0.00888411	0.004464	0.000376	0.004396
3329.13	0.00659635	0.00877646	0.00442	0.000391	0.004415
3331.06	0.00660572	0.00884025	0.004464	0.000444	0.004521
3332.99	0.00662311	0.00892239	0.004472	0.000403	0.004529
3334.92	0.00679373	0.00913849	0.004657	0.000624	0.004598
3336.85	0.00696434	0.00939207	0.004819	0.000911	0.004835
3338.78	0.00686933	0.00923897	0.004642	0.000654	0.004685
3340.71	0.00664854	0.00892797	0.004431	0.000432	0.004431
3342.64	0.00669805	0.0089503	0.004479	0.000495	0.004469
3344.56	0.00672013	0.00900054	0.004416	0.000465	0.004357
3346.49	0.00673017	0.00872383	0.004331	0.000408	0.004275
3348.42	0.00681915	0.00869353	0.004398	0.00055	0.004464
3350.35	0.00669939	0.00880198	0.004379	0.000666	0.004603
3352.28	0.00661107	0.00888172	0.004276	0.000601	0.004589
3354.21	0.00686933	0.0091369	0.004479	0.000711	0.004767
3356.14	0.00705868	0.00932589	0.00462	0.000828	0.005026
3358.07	0.00692219	0.00918634	0.004734	0.000661	0.004903
3359.99	0.0068506	0.0090412	0.004653	0.000662	0.004811
3361.92	0.00704597	0.00908267	0.004586	0.000974	0.00501
3363.85	0.00711756	0.00905955	0.004597	0.001032	0.004876
3365.78	0.00712893	0.00931392	0.004767	0.001034	0.004816
3367.71	0.00693022	0.00920547	0.004642	0.000868	0.004734
3369.64	0.00660438	0.0087653	0.004379	0.000502	0.004341
3371.57	0.00639028	0.00851969	0.00418	0.00024	0.004008
3373.5	0.00649934	0.0086401	0.004176	0.000143	0.004166
3375.42	0.00659033	0.00871586	0.004176	0.000217	0.004374
3377.35	0.00655219	0.0087629	0.004246	0.00042	0.004352
3379.28	0.00656089	0.00877805	0.004224	0.000635	0.004382
3381.21	0.00670675	0.00880517	0.00425	0.000786	0.004338
3383.14	0.00685996	0.00895907	0.004409	0.000855	0.004346
3385.07	0.00702924	0.00915683	0.004605	0.000932	0.004644
3387	0.00669805	0.00891681	0.004383	0.000767	0.004611
3388.93	0.00658899	0.00886178	0.004379	0.00081	0.004551
3390.86	0.00678771	0.00907629	0.004472	0.001032	0.004789
3392.78	0.00700248	0.0092278	0.00456	0.001201	0.005045
3394.71	0.00678101	0.0090117	0.004339	0.0009	0.004693
3396.64	0.00693891	0.00921026	0.004564	0.000985	0.004772
3398.57	0.00723732	0.00949015	0.004886	0.001249	0.005051
3400.5	0.00704998	0.00938808	0.004897	0.001122	0.004879
3402.43	0.00686465	0.0092278	0.004793	0.001093	0.004696
3404.36	0.00678704	0.00920149	0.004716	0.001045	0.004625
3406.28	0.00668199	0.00900373	0.004483	0.000731	0.004423
3408.21	0.00675158	0.00877805	0.00428	0.00045	0.00427
3410.14	0.00686197	0.00859704	0.00435	0.000477	0.004286
3412.07	0.00676763	0.00853006	0.004394	0.000553	0.004366
3414	0.00654952	0.0085149	0.004195	0.000521	0.004243
3415.93	0.00657829	0.00869991	0.004209	0.000601	0.004123
3417.86	0.00668266	0.00893036	0.004365	0.000825	0.004278
3419.79	0.00731895	0.00971264	0.004875	0.001608	0.005048
3421.72	0.00763475	0.0099415	0.005207	0.001887	0.005305
3423.64	0.0072875	0.00934662	0.005078	0.001255	0.004753
3425.57	0.00689676	0.00900293	0.00466	0.000821	0.004292
3427.5	0.00678971	0.00892398	0.004505	0.000764	0.004139
3429.43	0.0069804	0.00892478	0.00456	0.000911	0.004128
3431.36	0.00702857	0.00889209	0.004609	0.000977	0.004114
3433.29	0.00694895	0.00886418	0.004605	0.000926	0.004292
3435.22	0.00693891	0.00887056	0.004875	0.001034	0.00451
3437.15	0.00691951	0.00894551	0.004849	0.001103	0.004548
3439.07	0.00694025	0.00901489	0.004712	0.000955	0.004507
3441	0.00698307	0.00911616	0.004815	0.001047	0.004494
3442.93	0.00742934	0.00947102	0.005303	0.001603	0.004761
3444.86	0.00749959	0.00961216	0.005281	0.001855	0.004882
3446.79	0.00802214	0.0103936	0.005762	0.002578	0.005728
3448.72	0.0079666	0.0101145	0.005595	0.002181	0.005428
3450.65	0.0071383	0.0089798	0.004815	0.000823	0.004024
3452.58	0.00696501	0.0087015	0.00466	0.000481	0.003792
3454.51	0.00701987	0.00893993	0.004775	0.000669	0.004169
3456.43	0.00712893	0.0091656	0.004886	0.000989	0.004428
3458.36	0.00713562	0.00913371	0.004997	0.001056	0.004275
3460.29	0.00718714	0.00927645	0.005115	0.001154	0.004254
3462.22	0.0075277	0.00967516	0.005507	0.001455	0.004622
3464.15	0.00735976	0.00967436	0.005396	0.001165	0.004518
3466.08	0.00724802	0.0095994	0.005366	0.001026	0.004308
3468.01	0.00739455	0.00940643	0.005514	0.001063	0.004467
3469.94	0.0072333	0.0089495	0.005277	0.000656	0.004194
3471.86	0.0070085	0.00878364	0.005026	0.000633	0.003942
3473.79	0.0070734	0.00900931	0.005133	0.000928	0.003951
3475.72	0.0070734	0.00903004	0.005218	0.001083	0.004177
3477.65	0.00680042	0.00888331	0.005052	0.000897	0.003874
3479.58	0.0073437	0.00957548	0.005359	0.001445	0.004284
3481.51	0.00831318	0.0104614	0.005928	0.002263	0.00519
3483.44	0.00827237	0.0103865	0.005832	0.002064	0.005108
3485.37	0.00763475	0.0098482	0.005444	0.00131	0.004417
3487.3	0.0076876	0.0100571	0.005544	0.001445	0.004636
3489.22	0.00763608	0.0100173	0.005488	0.001281	0.004524
3491.15	0.00716506	0.00956192	0.005011	0.000767	0.003789
3493.08	0.00693423	0.00922222	0.00479	0.000558	0.003388
3495.01	0.00702857	0.00921744	0.004882	0.00087	0.003506
3496.94	0.00722929	0.00956113	0.005233	0.001336	0.004043
3498.87	0.00716305	0.00954837	0.005133	0.001137	0.004163
3500.8	0.0077418	0.0102286	0.005451	0.001678	0.004781
3502.73	0.00930675	0.011817	0.006593	0.003424	0.006309
3504.66	0.00937433	0.0117708	0.006645	0.003144	0.005976
3506.58	0.00780201	0.0102007	0.005366	0.001323	0.004194
3508.51	0.00790906	0.010396	0.005555	0.001691	0.004573
3510.44	0.00846908	0.0110706	0.00602	0.00254	0.005239
3512.37	0.00756316	0.0101831	0.005266	0.001284	0.003929
3514.3	0.007147	0.00943752	0.004786	0.000408	0.003216
3516.23	0.00699043	0.00917597	0.004701	0.000166	0.003014
3518.16	0.0069824	0.00933067	0.004849	0.000442	0.003282
3520.09	0.00703593	0.00943752	0.004878	0.00076	0.003481
3522.01	0.00815261	0.0104574	0.005632	0.002167	0.004707
3523.94	0.00992631	0.0121488	0.007029	0.004213	0.006705
3525.87	0.00976774	0.01225	0.007025	0.004085	0.006514
3527.8	0.00985739	0.0124326	0.007099	0.003842	0.006391
3529.73	0.00954092	0.0118792	0.006678	0.003091	0.005709
3531.66	0.00826033	0.0104231	0.005736	0.001455	0.004136
3533.59	0.00739054	0.00947819	0.004978	0.000519	0.003164
3535.52	0.00807098	0.0102134	0.005691	0.001477	0.003972
3537.45	0.0083172	0.0104534	0.005972	0.001874	0.004262
3539.37	0.00723866	0.00929399	0.005104	0.000682	0.003009
3541.3	0.00697839	0.009042	0.004882	0.000579	0.002998
3543.23	0.0082891	0.0104869	0.00595	0.002252	0.004666
3545.16	0.0103893	0.0129741	0.007964	0.004927	0.007462
3547.09	0.0108737	0.01349	0.00853	0.005229	0.007811
3549.02	0.00922312	0.0115666	0.006904	0.002832	0.005119
3550.95	0.00882703	0.0109702	0.006297	0.002038	0.004035
3552.88	0.00992363	0.0119032	0.007203	0.003086	0.005215
3554.8	0.00873135	0.0107557	0.006279	0.001588	0.004093
3556.73	0.00753372	0.00969589	0.005115	0.000336	0.002951
3558.66	0.00761334	0.00997579	0.005281	0.000965	0.003339
3560.59	0.00838745	0.0107501	0.006157	0.002339	0.004516
3562.52	0.00876949	0.0110116	0.006349	0.002587	0.004884
3564.45	0.0102294	0.0127628	0.007188	0.00425	0.006593
3566.38	0.0152093	0.0181566	0.011331	0.009811	0.01195
3568.31	0.016261	0.0190369	0.012484	0.010444	0.012458
3570.24	0.0113561	0.0136894	0.00826	0.004419	0.006416
3572.16	0.00826099	0.0105611	0.005525	0.001056	0.002943
3574.09	0.0077157	0.0100236	0.005189	0.000598	0.002403
3576.02	0.00797597	0.0103769	0.005422	0.001071	0.00288
3577.95	0.00793315	0.0104383	0.00527	0.001127	0.002919
3579.88	0.00813922	0.0107469	0.005377	0.001514	0.003265
3581.81	0.00808838	0.0105571	0.005381	0.001354	0.003123
3583.74	0.0081419	0.0105021	0.005148	0.001489	0.003142
3585.66	0.0103451	0.0129231	0.006767	0.004228	0.005709
3587.59	0.0154214	0.0181199	0.011165	0.009783	0.011347
3589.52	0.0138992	0.0163233	0.010226	0.007604	0.009476
3591.45	0.0101618	0.0125754	0.007044	0.003395	0.005223
3593.38	0.0104709	0.0129693	0.007037	0.003945	0.00558
3595.31	0.0121423	0.0146296	0.008334	0.005866	0.007399
3597.24	0.0115742	0.0142883	0.008186	0.005191	0.006607
3599.17	0.0111547	0.0140163	0.00782	0.004488	0.005965
3601.1	0.0114177	0.0140905	0.007879	0.004594	0.006222
3603.02	0.00986275	0.0124151	0.006578	0.003004	0.00477
3604.95	0.00839882	0.0111608	0.005455	0.001604	0.003238
3606.88	0.0101812	0.0131687	0.006819	0.003815	0.005327
3608.81	0.0127538	0.0156718	0.009102	0.006871	0.008305
3610.74	0.0118974	0.0146758	0.008504	0.005832	0.007123
3612.67	0.012531	0.0152579	0.008884	0.006499	0.007579
3614.6	0.0133386	0.0160099	0.009287	0.007145	0.008398
3616.53	0.0116799	0.0144557	0.007772	0.004977	0.006116
3618.45	0.0134677	0.0163504	0.009284	0.0068	0.007664
3620.38	0.0148701	0.0174963	0.010876	0.008268	0.009242
3622.31	0.0114565	0.0141368	0.008082	0.004874	0.00611
3624.24	0.00876146	0.0114885	0.005551	0.002276	0.003448
3626.17	0.00880696	0.0117875	0.005307	0.002738	0.003536
3628.1	0.0140611	0.0174014	0.009786	0.008475	0.008794
3630.03	0.019403	0.0222625	0.014646	0.013484	0.014413
3631.96	0.0140625	0.016647	0.010071	0.00698	0.008221
3633.89	0.0113855	0.0139486	0.007672	0.00404	0.005026
3635.81	0.00973027	0.0121456	0.006423	0.002259	0.003186
3637.74	0.00846573	0.0106959	0.005396	0.000926	0.001944
3639.67	0.00808904	0.0103067	0.005192	0.000778	0.001952
3641.6	0.0080315	0.0104383	0.005122	0.001252	0.002269
3643.53	0.00763809	0.0102716	0.00469	0.001149	0.001998
3645.46	0.00740325	0.0103625	0.004272	0.001116	0.001586
3647.39	0.0134182	0.0166343	0.009236	0.007538	0.007582
3649.32	0.0213594	0.0240328	0.015611	0.014942	0.01495
3651.24	0.0195837	0.021729	0.014247	0.01231	0.013088
3653.17	0.0119007	0.0143353	0.008016	0.003964	0.004996
3655.1	0.00939975	0.0119614	0.005876	0.001151	0.001725
3657.03	0.0114491	0.0138505	0.007861	0.003453	0.004163
3658.96	0.00948941	0.0117046	0.006397	0.001493	0.002561
3660.89	0.00759594	0.00980992	0.004623	-0.00027	0.000748
3662.82	0.0068332	0.00921744	0.004069	-0.00086	0.000287
3664.75	0.00623773	0.0086696	0.003485	-0.00122	-7.6e-05
3666.68	0.00610191	0.00858269	0.00313	-0.00124	-0.00042
3668.6	0.00934957	0.0120539	0.005854	0.002601	0.00302
3670.53	0.015408	0.0180808	0.011457	0.009439	0.010118
3672.46	0.0127993	0.0154756	0.008977	0.006064	0.006866
3674.39	0.0131251	0.0159102	0.008555	0.005549	0.005414
3676.32	0.0202106	0.022729	0.014461	0.012423	0.012422
3678.25	0.0151785	0.0177148	0.010488	0.006957	0.007691
3680.18	0.0112705	0.0138919	0.007306	0.003212	0.003929
3682.11	0.00865842	0.0112245	0.005433	0.001112	0.001865
3684.03	0.00728951	0.00980992	0.004405	0.00041	0.001114
3685.96	0.00698776	0.00967595	0.004047	0.000424	0.000923
3687.89	0.0107519	0.0136096	0.006841	0.004151	0.004259
3689.82	0.0175791	0.0199436	0.012358	0.01064	0.010678
3691.75	0.0164986	0.0186007	0.011368	0.009087	0.009657
3693.68	0.0120693	0.0142316	0.007717	0.004435	0.005245
3695.61	0.00964731	0.0118593	0.005651	0.002197	0.00285
3697.54	0.00890598	0.0111592	0.00513	0.001852	0.002419
3699.47	0.00824962	0.0107365	0.004638	0.001386	0.001687
3701.39	0.0105144	0.0133529	0.006852	0.003845	0.004136
3703.32	0.0115635	0.0142986	0.007883	0.004921	0.005624
3705.25	0.00922646	0.0119271	0.005732	0.002525	0.00326
3707.18	0.00834864	0.0111073	0.004601	0.001829	0.002228
3709.11	0.0107011	0.013376	0.006338	0.004257	0.004327
3711.04	0.0162651	0.0188121	0.011032	0.009636	0.009564
3712.97	0.0169261	0.0192777	0.011978	0.009796	0.010072
3714.9	0.0122774	0.0147603	0.008042	0.004877	0.00549
3716.82	0.00935626	0.011837	0.005433	0.001882	0.002479
3718.75	0.00984401	0.0123082	0.005843	0.00294	0.003577
3720.68	0.0110323	0.0136846	0.007048	0.004739	0.005395
3722.61	0.0134476	0.0162786	0.009062	0.007719	0.008322
3724.54	0.0145088	0.0174979	0.009827	0.00901	0.009501
3726.47	0.014959	0.017848	0.010034	0.009385	0.009859
3728.4	0.0125872	0.0152675	0.00816	0.006485	0.007167
3730.33	0.00994437	0.0128186	0.00588	0.003889	0.004224
3732.26	0.0131532	0.0161447	0.008437	0.007597	0.007563
3734.18	0.0192056	0.0222848	0.013297	0.01399	0.01397
3736.11	0.0231712	0.0261149	0.016841	0.017765	0.017839
3738.04	0.0182589	0.0207737	0.012754	0.011764	0.012207
3739.97	0.013093	0.0157005	0.008212	0.00635	0.006804
3741.9	0.0101672	0.0131615	0.005662	0.003656	0.00374
3743.83	0.0129706	0.0161957	0.008611	0.006945	0.006651
3745.76	0.019126	0.0218973	0.014247	0.013498	0.013528
3747.68	0.015402	0.0181438	0.010522	0.008862	0.008655
3749.61	0.0173021	0.0203957	0.011416	0.010005	0.009094
3751.54	0.0212898	0.0240854	0.014849	0.013942	0.012971
3753.47	0.0170218	0.019375	0.011627	0.009841	0.009738
3755.4	0.0115006	0.0140977	0.007269	0.004299	0.004666
3757.33	0.0106255	0.0133832	0.006556	0.003511	0.003724
3759.26	0.0120667	0.0148688	0.00802	0.005033	0.005152
3761.19	0.0110329	0.0138178	0.007354	0.003943	0.004412
3763.12	0.00806496	0.0107692	0.004572	0.000706	0.0013
3765.05	0.00860289	0.0113155	0.004701	0.001572	0.001996
3766.97	0.00950814	0.0120858	0.005418	0.00255	0.002826
3768.9	0.00968745	0.012313	0.005677	0.002296	0.002463
3770.83	0.0112905	0.0137723	0.007277	0.003723	0.00415
3772.76	0.00881298	0.0109845	0.005041	0.000998	0.001619
3774.69	0.00661575	0.00890484	0.003204	-0.00107	-0.0005
3776.62	0.00608384	0.00852766	0.002779	-0.00131	-0.001
3778.55	0.00782342	0.0103251	0.004294	0.000686	0.000732
3780.47	0.0100093	0.0125148	0.006338	0.003135	0.00338
3782.4	0.00836069	0.0107621	0.004864	0.001048	0.001477
3784.33	0.00845904	0.0108402	0.004793	0.001053	0.001275
3786.26	0.00877551	0.0112636	0.005226	0.001482	0.001685
3788.19	0.00726074	0.00973975	0.003973	-5.1e-05	0.000232
3790.12	0.00643912	0.00878124	0.00323	-0.00086	-0.00045
3792.05	0.00599954	0.00841762	0.002801	-0.00121	-0.00065
3793.98	0.00581822	0.00847503	0.002517	-0.00143	-0.00102
3795.91	0.00809573	0.0110316	0.004383	0.0013	0.001644
3797.84	0.0102174	0.0130841	0.00626	0.003805	0.004062
3799.76	0.00967674	0.0125594	0.005562	0.002874	0.00261
3801.69	0.0150039	0.0178878	0.01013	0.00816	0.007868
3803.62	0.0136731	0.0163632	0.00911	0.006475	0.006645
3805.55	0.00967674	0.0123505	0.00558	0.001702	0.001783
3807.48	0.0116364	0.0142125	0.007299	0.003656	0.003942
3809.41	0.00968143	0.0119877	0.005884	0.001839	0.002348
3811.34	0.00660237	0.00912174	0.00333	-0.00074	-0.00023
3813.26	0.00540139	0.0082055	0.002439	-0.00137	-0.00111
3815.19	0.00802481	0.0108729	0.004716	0.001833	0.001652
3817.12	0.0127063	0.0152189	0.008485	0.006678	0.006711
3819.05	0.0114699	0.0141981	0.00677	0.004749	0.004658
3820.98	0.0155746	0.0186223	0.010207	0.008512	0.008098
3822.91	0.0155365	0.0181287	0.010584	0.008243	0.008283
3824.84	0.0105131	0.0130132	0.00632	0.002865	0.003082
3826.77	0.00982795	0.0122979	0.00568	0.00259	0.002749
3828.7	0.00883907	0.0112844	0.005078	0.001895	0.002029
3830.62	0.00816532	0.0107597	0.004546	0.001371	0.001346
3832.55	0.00957906	0.012447	0.005806	0.003275	0.003314
3834.48	0.00999656	0.0129797	0.006046	0.003694	0.003931
3836.41	0.0123878	0.0151431	0.00768	0.005604	0.005799
3838.34	0.0164919	0.0189955	0.010865	0.009608	0.009528
3840.27	0.0165943	0.0192108	0.011128	0.009742	0.009545
3842.2	0.0133212	0.0157444	0.008341	0.006043	0.005933
3844.13	0.0116512	0.0140211	0.007273	0.004295	0.004633
3846.05	0.00913279	0.0115627	0.005433	0.002096	0.002681
3847.98	0.00690814	0.00949414	0.003714	0.000548	0.000857
3849.91	0.00699512	0.00983066	0.003574	0.00122	0.001185
3851.84	0.0112678	0.0144158	0.006708	0.005464	0.004742
3853.77	0.022179	0.0251173	0.01591	0.015943	0.014991
3855.7	0.0183486	0.0209667	0.01302	0.011323	0.011319
3857.63	0.0120854	0.0147005	0.007487	0.005057	0.005206
3859.56	0.00826434	0.0110571	0.004368	0.00119	0.001185
3861.49	0.00846238	0.01153	0.004708	0.001744	0.001892
3863.41	0.0112671	0.0142603	0.007377	0.005274	0.005641
3865.34	0.0128923	0.0158377	0.008984	0.007573	0.008059
3867.27	0.0102829	0.0131073	0.00629	0.004175	0.004507
3869.2	0.0114946	0.0144661	0.006892	0.005223	0.005026
3871.13	0.0150367	0.0178512	0.009908	0.008827	0.008963
3873.06	0.0122152	0.0148911	0.007439	0.005408	0.005821
3874.99	0.0114364	0.0139637	0.007055	0.004729	0.00498
3876.92	0.00780804	0.0105388	0.004339	0.001233	0.001398
3878.84	0.00720453	0.0102629	0.003899	0.000804	0.000754
3880.77	0.0117696	0.014801	0.007547	0.006184	0.006023
3882.7	0.0112792	0.0142293	0.007051	0.005729	0.005591
3884.63	0.0103338	0.0132803	0.006028	0.004406	0.004038
3886.56	0.0118646	0.0144142	0.00741	0.005763	0.005635
3888.49	0.00824694	0.010829	0.004365	0.001616	0.001695
3890.42	0.00841956	0.0111632	0.004379	0.001725	0.001603
3892.35	0.0115843	0.0142548	0.007299	0.005326	0.005471
3894.28	0.00934823	0.0120993	0.005665	0.003197	0.003617
3896.2	0.00677901	0.00964007	0.003426	0.0006	0.000857
3898.13	0.00783078	0.0107628	0.004298	0.002111	0.001993
3900.06	0.0113073	0.0143066	0.007129	0.006347	0.006162
3901.99	0.0134791	0.0164947	0.008777	0.008039	0.007879
3903.92	0.015123	0.0180561	0.009871	0.008792	0.008747
3905.85	0.0135406	0.0161144	0.008652	0.006732	0.006896
3907.78	0.00886583	0.0114064	0.004949	0.001866	0.002244
3909.71	0.00623505	0.00885461	0.002934	-0.00071	-0.00034
3911.64	0.0058383	0.00849497	0.002672	-0.00072	-0.00037
3913.56	0.00573794	0.00840326	0.002609	-0.00045	-0.0002
3915.49	0.00692955	0.00968313	0.003407	0.00118	0.001166
3917.42	0.00965801	0.0123681	0.00575	0.003877	0.004024
3919.35	0.00951818	0.0122556	0.005747	0.003517	0.003721
3921.28	0.00829712	0.0111616	0.00456	0.002008	0.00211
3923.21	0.007984	0.0110459	0.004117	0.001812	0.001887
3925.14	0.00915353	0.0120977	0.005462	0.003337	0.003596
3927.07	0.00807165	0.0106656	0.004601	0.001878	0.002192
3928.99	0.007519	0.0100547	0.003914	0.0013	0.001341
3930.92	0.00896887	0.0115754	0.004993	0.003172	0.003028
3932.85	0.00991694	0.0125618	0.005891	0.004123	0.004155
3934.78	0.00824561	0.0107923	0.004553	0.001958	0.002124
3936.71	0.00658297	0.00917358	0.003127	0.000199	0.000292
3938.64	0.00630798	0.00884743	0.00282	0.000114	0.00024
3940.57	0.00631534	0.00894711	0.002964	0.000241	0.000418
3942.5	0.00813922	0.0109909	0.004431	0.002439	0.002757
3944.42	0.00868853	0.0114096	0.004856	0.0029	0.003194
3946.35	0.0076856	0.0102956	0.004036	0.001657	0.001832
3948.28	0.00856877	0.0113753	0.004823	0.002596	0.003011
3950.21	0.00870793	0.0114877	0.005059	0.002559	0.003099
3952.14	0.00745343	0.0100962	0.004095	0.001011	0.001327
3954.07	0.00639095	0.00908905	0.003119	3.05e-05	0.000243
3956	0.00621699	0.00903801	0.0032	3.38e-05	0.000292
3957.93	0.00638961	0.00914088	0.003315	0.00022	0.00062
3959.86	0.00646521	0.00923498	0.003256	0.000315	0.000808
3961.78	0.00693557	0.00960817	0.003544	0.000952	0.001237
3963.71	0.00682584	0.00927485	0.003496	0.000693	0.000723
3965.64	0.00613469	0.00864887	0.00292	-0.0003	-5.7e-05
3967.57	0.00619892	0.00874616	0.002901	-0.00037	6.01e-05
3969.5	0.00660706	0.00889368	0.003027	6.43e-05	0.000407
3971.43	0.00677633	0.00920866	0.003193	0.000437	0.000576
3973.36	0.00674622	0.00937373	0.003263	0.000756	0.000814
3975.28	0.00691884	0.00942477	0.003526	0.000937	0.000912
3977.21	0.0066191	0.009105	0.003308	0.000449	0.000399
3979.14	0.00611328	0.00871825	0.003001	-0.00022	-0.00017
3981.07	0.00608518	0.00868874	0.00299	-0.00021	-0.00016
3983	0.00625646	0.00881633	0.003189	5.95e-05	-3.8e-05
3984.93	0.00596943	0.00862654	0.002971	-8.5e-05	-0.00025
3986.86	0.00581822	0.00853085	0.002909	-0.00014	-0.00043
3988.79	0.00596408	0.00869911	0.003001	-5e-05	-0.00012
3990.72	0.00636619	0.00917278	0.003285	0.000323	0.000494
3992.64	0.00626048	0.00908187	0.003049	0.000293	0.000431
3994.57	0.0063401	0.00903084	0.003034	0.000299	0.000371
3996.5	0.00620093	0.00892079	0.003079	0.000119	0.000238
3998.43	0.0058209	0.008609	0.002905	-0.00028	-0.0002
4000.36	0.00600021	0.00862973	0.002842	-0.00033	-0.00032
